# Supplementary material for: Laboratory evaluation of a bio-insecticide candidate from tangerine peel extracts against Trialeurodes vaporariorum (Homoptera: Aleyrodidae)
Source: PeerJ journal article supplement (doi:10.7717/peerj.16885), 2024-03-19
Supplement: Data.zip [file Apparatus for the extraction and recovery solvents.pdf › Data/Apparatus for the extraction and recovery solvents.pdf]

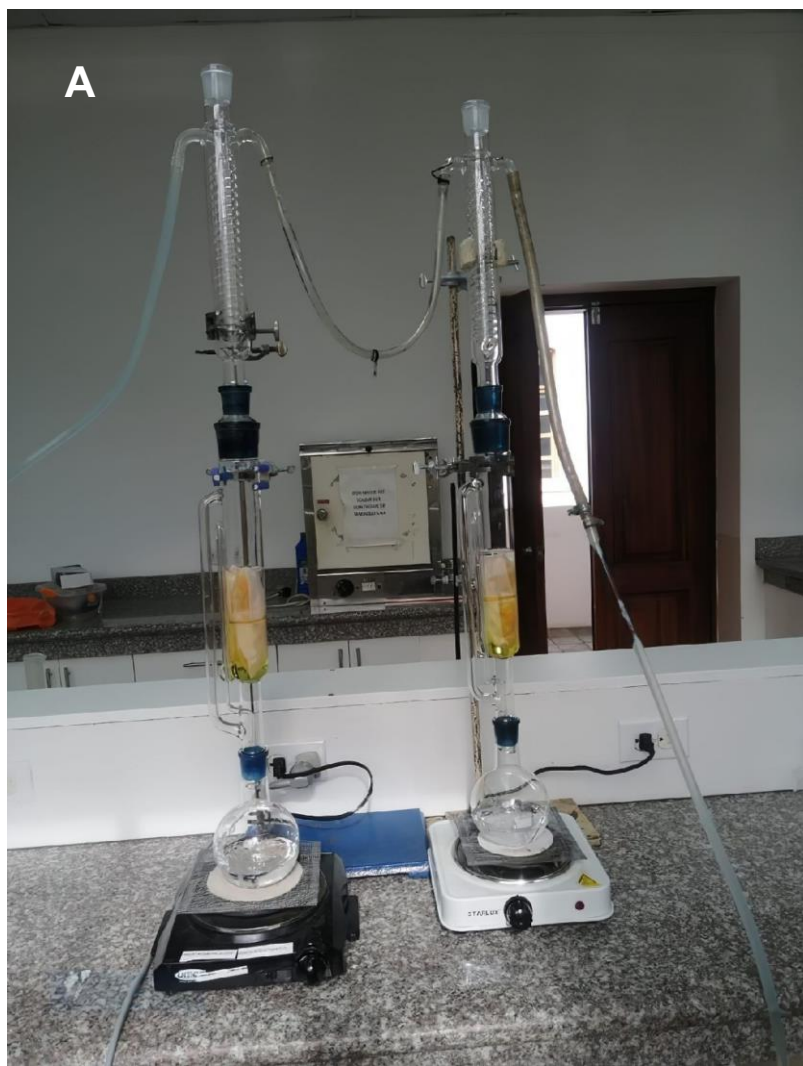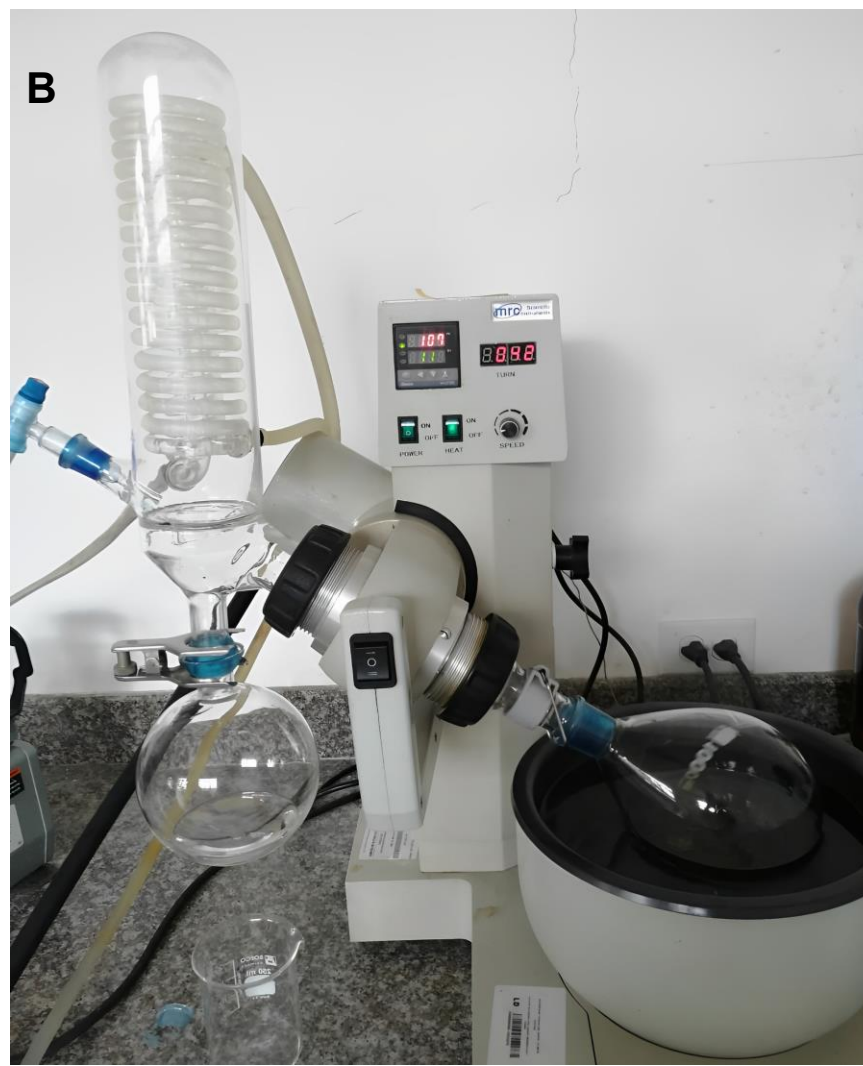

Apparatus for the extraction with solvents of the essential oil of the tangerine (*Citrus reticulata* L.) peel. (A) 250 mL Soxhlet apparatus. (B) Rotary evaporator for the removal of the solvent used.
