# Supplementary material for: Laboratory evaluation of a bio-insecticide candidate from tangerine peel extracts against Trialeurodes vaporariorum (Homoptera: Aleyrodidae)
Source: PeerJ journal article supplement (doi:10.7717/peerj.16885), 2024-03-19
Supplement: Data.zip [file data_paper.xlsx]

## Sheet: Sheet1
time	tto	tto1	conc_EO	mr	cm
0	C-	C-	NA	0	0
0	C-	C-	NA	0	0
0	C-	C-	NA	0	0
0	C+	C+	NA	0	0
0	C+	C+	NA	0	0
0	C+	C+	NA	0	0
0	PET	T1 - 12.5%	0.125	0	0
0	PET	T1 - 12.5%	0.125	0	0
0	PET	T1 - 12.5%	0.125	0	0
0	PET	T2 - 25.0%	0.25	0	0
0	PET	T2 - 25.0%	0.25	0	0
0	PET	T2 - 25.0%	0.25	0	0
0	PET	T3 - 33.3%	0.333	0	0
0	PET	T3 - 33.3%	0.333	0	0
0	PET	T3 - 33.3%	0.333	0	0
3	C-	C-	NA	0	0
3	C-	C-	NA	0	0
3	C-	C-	NA	0	0
3	C+	C+	NA	0	0
3	C+	C+	NA	0.3	30
3	C+	C+	NA	0.3	30
3	PET	T1 - 12.5%	0.125	0.4	40
3	PET	T1 - 12.5%	0.125	0.3	30
3	PET	T1 - 12.5%	0.125	0.2	20
3	PET	T2 - 25.0%	0.25	0.3	30
3	PET	T2 - 25.0%	0.25	0.3	30
3	PET	T2 - 25.0%	0.25	0.4	40
3	PET	T3 - 33.3%	0.333	0.5	50
3	PET	T3 - 33.3%	0.333	0.4	40
3	PET	T3 - 33.3%	0.333	0.6	60
6	C-	C-	NA	0	0
6	C-	C-	NA	0	0
6	C-	C-	NA	0	0
6	C+	C+	NA	0.3	30
6	C+	C+	NA	0.4	40
6	C+	C+	NA	0.3	30
6	PET	T1 - 12.5%	0.125	0.4	40
6	PET	T1 - 12.5%	0.125	0.3	30
6	PET	T1 - 12.5%	0.125	0.2	20
6	PET	T2 - 25.0%	0.25	0.4	40
6	PET	T2 - 25.0%	0.25	0.3	30
6	PET	T2 - 25.0%	0.25	0.4	40
6	PET	T3 - 33.3%	0.333	0.6	60
6	PET	T3 - 33.3%	0.333	0.6	60
6	PET	T3 - 33.3%	0.333	0.6	60
9	C-	C-	NA	0	0
9	C-	C-	NA	0	0
9	C-	C-	NA	0	0
9	C+	C+	NA	0.5	50
9	C+	C+	NA	0.4	40
9	C+	C+	NA	0.3	30
9	PET	T1 - 12.5%	0.125	0.4	40
9	PET	T1 - 12.5%	0.125	0.4	40
9	PET	T1 - 12.5%	0.125	0.3	30
9	PET	T2 - 25.0%	0.25	0.4	40
9	PET	T2 - 25.0%	0.25	0.3	30
9	PET	T2 - 25.0%	0.25	0.5	50
9	PET	T3 - 33.3%	0.333	0.7	70
9	PET	T3 - 33.3%	0.333	0.6	60
9	PET	T3 - 33.3%	0.333	0.6	60
12	C-	C-	NA	0	0
12	C-	C-	NA	0	0
12	C-	C-	NA	0	0
12	C+	C+	NA	0.6	60
12	C+	C+	NA	0.5	50
12	C+	C+	NA	0.4	40
12	PET	T1 - 12.5%	0.125	0.5	50
12	PET	T1 - 12.5%	0.125	0.6	60
12	PET	T1 - 12.5%	0.125	0.3	30
12	PET	T2 - 25.0%	0.25	0.6	60
12	PET	T2 - 25.0%	0.25	0.6	60
12	PET	T2 - 25.0%	0.25	0.5	50
12	PET	T3 - 33.3%	0.333	0.7	70
12	PET	T3 - 33.3%	0.333	0.7	70
12	PET	T3 - 33.3%	0.333	0.7	70
15	C-	C-	NA	0	0
15	C-	C-	NA	0	0
15	C-	C-	NA	0	0
15	C+	C+	NA	0.6	60
15	C+	C+	NA	0.7	70
15	C+	C+	NA	0.6	60
15	PET	T1 - 12.5%	0.125	0.6	60
15	PET	T1 - 12.5%	0.125	0.7	70
15	PET	T1 - 12.5%	0.125	0.5	50
15	PET	T2 - 25.0%	0.25	0.8	80
15	PET	T2 - 25.0%	0.25	0.8	80
15	PET	T2 - 25.0%	0.25	0.7	70
15	PET	T3 - 33.3%	0.333	0.9	90
15	PET	T3 - 33.3%	0.333	0.9	90
15	PET	T3 - 33.3%	0.333	0.9	90
0	C-	C-	NA	0	0
0	C-	C-	NA	0	0
0	C-	C-	NA	0	0
0	C+	C+	NA	0	0
0	C+	C+	NA	0	0
0	C+	C+	NA	0	0
0	HEX	T1 - 12.5%	0.125	0	0
0	HEX	T1 - 12.5%	0.125	0	0
0	HEX	T1 - 12.5%	0.125	0	0
0	HEX	T2 - 25.0%	0.25	0	0
0	HEX	T2 - 25.0%	0.25	0	0
0	HEX	T2 - 25.0%	0.25	0	0
0	HEX	T3 - 33.3%	0.333	0	0
0	HEX	T3 - 33.3%	0.333	0	0
0	HEX	T3 - 33.3%	0.333	0	0
3	C-	C-	NA	0	0
3	C-	C-	NA	0	0
3	C-	C-	NA	0	0
3	C+	C+	NA	0.2	20
3	C+	C+	NA	0.2	20
3	C+	C+	NA	0.1	10
3	HEX	T1 - 12.5%	0.125	0.2	20
3	HEX	T1 - 12.5%	0.125	0.2	20
3	HEX	T1 - 12.5%	0.125	0.1	10
3	HEX	T2 - 25.0%	0.25	0.3	30
3	HEX	T2 - 25.0%	0.25	0.3	30
3	HEX	T2 - 25.0%	0.25	0.2	20
3	HEX	T3 - 33.3%	0.333	0.2	20
3	HEX	T3 - 33.3%	0.333	0.3	30
3	HEX	T3 - 33.3%	0.333	0.3	30
6	C-	C-	NA	0	0
6	C-	C-	NA	0	0
6	C-	C-	NA	0	0
6	C+	C+	NA	0.3	30
6	C+	C+	NA	0.2	20
6	C+	C+	NA	0.3	30
6	HEX	T1 - 12.5%	0.125	0.3	30
6	HEX	T1 - 12.5%	0.125	0.3	30
6	HEX	T1 - 12.5%	0.125	0.2	20
6	HEX	T2 - 25.0%	0.25	0.5	50
6	HEX	T2 - 25.0%	0.25	0.5	50
6	HEX	T2 - 25.0%	0.25	0.2	20
6	HEX	T3 - 33.3%	0.333	0.4	40
6	HEX	T3 - 33.3%	0.333	0.3	30
6	HEX	T3 - 33.3%	0.333	0.5	50
9	C-	C-	NA	0	0
9	C-	C-	NA	0	0
9	C-	C-	NA	0	0
9	C+	C+	NA	0.3	30
9	C+	C+	NA	0.3	30
9	C+	C+	NA	0.3	30
9	HEX	T1 - 12.5%	0.125	0.3	30
9	HEX	T1 - 12.5%	0.125	0.3	30
9	HEX	T1 - 12.5%	0.125	0.2	20
9	HEX	T2 - 25.0%	0.25	0.7	70
9	HEX	T2 - 25.0%	0.25	0.5	50
9	HEX	T2 - 25.0%	0.25	0.6	60
9	HEX	T3 - 33.3%	0.333	0.4	40
9	HEX	T3 - 33.3%	0.333	0.5	50
9	HEX	T3 - 33.3%	0.333	0.7	70
12	C-	C-	NA	0	0
12	C-	C-	NA	0	0
12	C-	C-	NA	0	0
12	C+	C+	NA	0.3	30
12	C+	C+	NA	0.4	40
12	C+	C+	NA	0.5	50
12	HEX	T1 - 12.5%	0.125	0.5	50
12	HEX	T1 - 12.5%	0.125	0.5	50
12	HEX	T1 - 12.5%	0.125	0.3	30
12	HEX	T2 - 25.0%	0.25	0.6	60
12	HEX	T2 - 25.0%	0.25	0.6	60
12	HEX	T2 - 25.0%	0.25	0.5	50
12	HEX	T3 - 33.3%	0.333	0.7	70
12	HEX	T3 - 33.3%	0.333	0.7	70
12	HEX	T3 - 33.3%	0.333	0.7	70
15	C-	C-	NA	0	0
15	C-	C-	NA	0	0
15	C-	C-	NA	0	0
15	C+	C+	NA	0.5	50
15	C+	C+	NA	0.5	50
15	C+	C+	NA	0.5	50
15	HEX	T1 - 12.5%	0.125	0.6	60
15	HEX	T1 - 12.5%	0.125	0.5	50
15	HEX	T1 - 12.5%	0.125	0.5	50
15	HEX	T2 - 25.0%	0.25	1	100
15	HEX	T2 - 25.0%	0.25	0.9	90
15	HEX	T2 - 25.0%	0.25	0.8	80
15	HEX	T3 - 33.3%	0.333	0.8	80
15	HEX	T3 - 33.3%	0.333	1	100
15	HEX	T3 - 33.3%	0.333	1	100
