# Supplementary material for: Laboratory evaluation of a bio-insecticide candidate from tangerine peel extracts against Trialeurodes vaporariorum (Homoptera: Aleyrodidae)
Source: PeerJ journal article supplement (doi:10.7717/peerj.16885), 2024-03-19
Supplement: FTIRSpectra.zip [file FTIR - Extractos de cascara mandarina.xlsx]

## Sheet: FTIR-Aceite w eter de petroleo
wavenumber	%Transmittance
3999.43	99.9126
3997.57	99.8757
3995.71	100.008
3993.84	100.137
3991.98	100.126
3990.12	100.194
3988.25	100.135
3986.39	100.035
3984.52	100.089
3982.66	100.001
3980.8	99.8719
3978.93	99.8816
3977.07	99.9104
3975.21	99.9832
3973.34	100.033
3971.48	100.19
3969.61	100.195
3967.75	100.04
3965.89	100.116
3964.02	100.021
3962.16	100.046
3960.3	100.069
3958.43	100.009
3956.57	100.181
3954.71	100.155
3952.84	100.007
3950.98	100.087
3949.11	100.195
3947.25	100.137
3945.39	100.135
3943.52	100.193
3941.66	100.097
3939.8	99.9865
3937.93	100.08
3936.07	100.143
3934.21	100.129
3932.34	100.213
3930.48	100.271
3928.61	100.446
3926.75	100.455
3924.89	100.139
3923.02	100.013
3921.16	100.174
3919.3	100.227
3917.43	100.178
3915.57	100.119
3913.7	100.092
3911.84	99.9741
3909.98	99.9888
3908.11	100.326
3906.25	100.287
3904.39	99.9183
3902.52	100.114
3900.66	100.47
3898.8	100.31
3896.93	100.018
3895.07	99.9904
3893.2	99.9962
3891.34	100.029
3889.48	100.273
3887.61	100.397
3885.75	100.328
3883.89	100.312
3882.02	100.078
3880.16	100.05
3878.3	100.029
3876.43	99.8184
3874.57	99.9586
3872.7	100.341
3870.84	100.407
3868.98	100.257
3867.11	100.363
3865.25	100.41
3863.39	100.158
3861.52	100.204
3859.66	100.43
3857.79	100.372
3855.93	100.573
3854.07	100.797
3852.2	100.307
3850.34	99.9554
3848.48	99.9943
3846.61	100.067
3844.75	100.129
3842.89	100.253
3841.02	100.385
3839.16	100.131
3837.29	99.8338
3835.43	99.8079
3833.57	100.046
3831.7	100.358
3829.84	100.337
3827.98	100.109
3826.11	100.098
3824.25	100.233
3822.38	100.208
3820.52	100.189
3818.66	100.302
3816.79	100.172
3814.93	100.039
3813.07	100.072
3811.2	100.158
3809.34	100.353
3807.48	100.356
3805.61	100.263
3803.75	100.314
3801.88	100.32
3800.02	100.38
3798.16	100.453
3796.29	100.476
3794.43	100.275
3792.57	99.9228
3790.7	99.8703
3788.84	99.9469
3786.98	99.9757
3785.11	99.8548
3783.25	100.067
3781.38	100.326
3779.52	100.142
3777.66	99.9837
3775.79	100.104
3773.93	100.25
3772.07	100.406
3770.2	100.515
3768.34	100.315
3766.47	100.163
3764.61	100.143
3762.75	100.024
3760.88	99.953
3759.02	100.197
3757.16	100.459
3755.29	100.376
3753.43	100.14
3751.57	100.215
3749.7	100.475
3747.84	100.623
3745.97	100.565
3744.11	100.084
3742.25	99.9938
3740.38	100.337
3738.52	100.598
3736.66	100.902
3734.79	100.944
3732.93	100.211
3731.07	99.9243
3729.2	100.165
3727.34	100.196
3725.47	100.273
3723.61	100.424
3721.75	100.482
3719.88	100.478
3718.02	100.262
3716.16	99.9477
3714.29	100.196
3712.43	100.608
3710.56	100.543
3708.7	100.507
3706.84	100.401
3704.97	100.372
3703.11	100.177
3701.25	99.8243
3699.38	99.9882
3697.52	100.28
3695.66	100.289
3693.79	100.413
3691.93	100.616
3690.06	100.582
3688.2	100.579
3686.34	100.584
3684.47	100.279
3682.61	100.041
3680.75	100.087
3678.88	100.464
3677.02	100.554
3675.16	100.438
3673.29	100.68
3671.43	100.575
3669.56	100.04
3667.7	99.9671
3665.84	100.155
3663.97	100.148
3662.11	100.179
3660.25	100.367
3658.38	100.273
3656.52	100.216
3654.65	100.437
3652.79	100.556
3650.93	100.294
3649.06	100.045
3647.2	100.267
3645.34	100.183
3643.47	99.8119
3641.61	99.939
3639.75	100.2
3637.88	100.163
3636.02	100.194
3634.15	100.292
3632.29	100.499
3630.43	100.559
3628.56	100.154
3626.7	99.9962
3624.84	100.125
3622.97	100.359
3621.11	100.283
3619.25	99.8928
3617.38	100.037
3615.52	100.312
3613.65	100.186
3611.79	100.137
3609.93	100.07
3608.06	100.028
3606.2	100.135
3604.34	100.136
3602.47	99.9558
3600.61	99.9362
3598.74	100.144
3596.88	100.33
3595.02	100.229
3593.15	99.9099
3591.29	99.964
3589.43	100.208
3587.56	100.133
3585.7	100
3583.84	99.8628
3581.97	99.7664
3580.11	99.7694
3578.24	99.8802
3576.38	100.041
3574.52	99.8164
3572.65	99.7366
3570.79	100.006
3568.93	100.142
3567.06	99.9261
3565.2	99.8074
3563.33	99.9542
3561.47	100.148
3559.61	100.094
3557.74	99.8926
3555.88	99.6766
3554.02	99.6659
3552.15	99.8954
3550.29	99.8914
3548.43	99.7921
3546.56	99.8019
3544.7	99.9546
3542.83	100.137
3540.97	99.8426
3539.11	99.7143
3537.24	99.742
3535.38	99.7061
3533.52	99.863
3531.65	99.9287
3529.79	99.8092
3527.93	100.09
3526.06	100.602
3524.2	100.209
3522.33	99.6252
3520.47	99.6654
3518.61	99.8192
3516.74	99.8899
3514.88	99.8683
3513.02	99.8466
3511.15	99.8976
3509.29	99.8581
3507.42	99.9931
3505.56	100.187
3503.7	100.161
3501.83	99.8355
3499.97	99.6077
3498.11	99.613
3496.24	99.7224
3494.38	99.8047
3492.52	99.6762
3490.65	99.7558
3488.79	99.9425
3486.92	99.9825
3485.06	99.8374
3483.2	99.8107
3481.33	100.074
3479.47	99.9676
3477.61	99.7084
3475.74	99.544
3473.88	99.8321
3472.02	100.26
3470.15	99.9173
3468.29	99.653
3466.42	99.8437
3464.56	99.6459
3462.7	99.4912
3460.83	99.6507
3458.97	99.6957
3457.11	99.6464
3455.24	99.6749
3453.38	99.7788
3451.51	99.7277
3449.65	99.6171
3447.79	99.7494
3445.92	99.7956
3444.06	99.5279
3442.2	99.4631
3440.33	99.4783
3438.47	99.385
3436.61	99.4494
3434.74	99.6212
3432.88	99.7548
3431.01	99.7658
3429.15	99.6804
3427.29	99.6876
3425.42	99.7649
3423.56	99.7229
3421.7	99.4826
3419.83	99.3506
3417.97	99.5505
3416.11	99.7553
3414.24	99.6694
3412.38	99.5758
3410.51	99.6108
3408.65	99.7878
3406.79	99.9941
3404.92	99.963
3403.06	99.5789
3401.2	99.3229
3399.33	99.3405
3397.47	99.3818
3395.6	99.3968
3393.74	99.3614
3391.88	99.585
3390.01	99.8978
3388.15	99.7961
3386.29	99.5348
3384.42	99.4531
3382.56	99.5729
3380.7	99.6159
3378.83	99.2872
3376.97	99.2984
3375.1	99.5951
3373.24	99.5956
3371.38	99.6857
3369.51	99.6938
3367.65	99.6999
3365.79	99.7198
3363.92	99.6372
3362.06	99.7019
3360.2	99.8149
3358.33	99.7479
3356.47	99.4653
3354.6	99.2742
3352.74	99.4223
3350.88	99.8748
3349.01	100.098
3347.15	99.7317
3345.29	99.5785
3343.42	99.617
3341.56	99.4779
3339.69	99.5018
3337.83	99.5975
3335.97	99.5129
3334.1	99.4702
3332.24	99.7002
3330.38	99.6399
3328.51	99.4953
3326.65	99.6166
3324.79	99.7763
3322.92	99.9259
3321.06	99.8994
3319.19	99.6395
3317.33	99.5668
3315.47	99.5816
3313.6	99.5224
3311.74	99.5367
3309.88	99.5622
3308.01	99.4592
3306.15	99.392
3304.28	99.4276
3302.42	99.5118
3300.56	99.6456
3298.69	99.6244
3296.83	99.5689
3294.97	99.6504
3293.1	99.6867
3291.24	99.4487
3289.38	99.3427
3287.51	99.4932
3285.65	99.5248
3283.78	99.5618
3281.92	99.8107
3280.06	99.7876
3278.19	99.3928
3276.33	99.2782
3274.47	99.559
3272.6	99.6332
3270.74	99.5338
3268.88	99.693
3267.01	99.7867
3265.15	99.5912
3263.28	99.5721
3261.42	99.749
3259.56	99.7074
3257.69	99.6509
3255.83	99.7602
3253.97	99.7317
3252.1	99.5978
3250.24	99.4007
3248.37	99.2143
3246.51	99.3196
3244.65	99.5882
3242.78	99.8644
3240.92	99.9877
3239.06	99.6763
3237.19	99.3397
3235.33	99.3519
3233.47	99.4743
3231.6	99.5464
3229.74	99.5609
3227.87	99.6163
3226.01	99.6965
3224.15	99.6787
3222.28	99.6001
3220.42	99.6098
3218.56	99.6413
3216.69	99.6522
3214.83	99.7107
3212.97	99.6674
3211.1	99.6259
3209.24	99.7079
3207.37	99.6727
3205.51	99.6271
3203.65	99.6798
3201.78	99.6305
3199.92	99.4123
3198.06	99.2557
3196.19	99.3703
3194.33	99.5013
3192.46	99.5207
3190.6	99.5642
3188.74	99.6503
3186.87	99.6457
3185.01	99.6793
3183.15	99.7436
3181.28	99.6209
3179.42	99.5214
3177.56	99.6188
3175.69	99.6045
3173.83	99.4784
3171.96	99.4058
3170.1	99.3814
3168.24	99.4055
3166.37	99.4895
3164.51	99.5615
3162.65	99.4925
3160.78	99.3244
3158.92	99.2018
3157.06	99.3009
3155.19	99.6064
3153.33	99.6907
3151.46	99.5166
3149.6	99.5438
3147.74	99.5552
3145.87	99.4363
3144.01	99.5257
3142.15	99.5033
3140.28	99.2897
3138.42	99.3278
3136.55	99.4568
3134.69	99.4744
3132.83	99.427
3130.96	99.2352
3129.1	99.1542
3127.24	99.286
3125.37	99.2823
3123.51	99.2433
3121.65	99.3674
3119.78	99.4145
3117.92	99.355
3116.05	99.1978
3114.19	99.012
3112.33	98.9703
3110.46	98.9598
3108.6	99.104
3106.74	99.2545
3104.87	99.1517
3103.01	99.0621
3101.15	99.0831
3099.28	99.1794
3097.42	99.1849
3095.55	98.8669
3093.69	98.4523
3091.83	98.169
3089.96	97.751
3088.1	97.1714
3086.24	96.9176
3084.37	96.7775
3082.51	96.5821
3080.64	96.6788
3078.78	96.8424
3076.92	96.7944
3075.05	96.7569
3073.19	96.8747
3071.33	96.9429
3069.46	97.0167
3067.6	97.2712
3065.74	97.4583
3063.87	97.6018
3062.01	97.867
3060.14	97.8695
3058.28	97.7313
3056.42	97.8799
3054.55	98.0419
3052.69	97.9551
3050.83	97.8691
3048.96	97.837
3047.1	97.7673
3045.24	97.7603
3043.37	97.812
3041.51	97.8578
3039.64	97.7526
3037.78	97.6674
3035.92	97.7064
3034.05	97.8129
3032.19	97.8139
3030.33	97.6358
3028.46	97.4813
3026.6	97.3041
3024.73	97.0262
3022.87	96.6179
3021.01	96.1069
3019.14	95.7507
3017.28	95.4961
3015.42	95.1366
3013.55	94.8872
3011.69	94.8077
3009.83	94.738
3007.96	94.6683
3006.1	94.7123
3004.23	94.9563
3002.37	95.1709
3000.51	95.3069
2998.64	95.4853
2996.78	95.5111
2994.92	95.332
2993.05	95.0932
2991.19	94.7758
2989.32	94.4424
2987.46	94.1359
2985.6	93.7656
2983.73	93.3521
2981.87	92.9507
2980.01	92.3767
2978.14	91.4856
2976.28	90.5494
2974.42	89.4929
2972.55	88.0115
2970.69	86.1041
2968.82	83.9717
2966.96	81.939
2965.1	80.4282
2963.23	79.7439
2961.37	79.686
2959.51	80.1409
2957.64	81.0023
2955.78	81.9932
2953.92	83.2044
2952.05	84.4646
2950.19	85.4225
2948.32	85.8217
2946.46	85.6807
2944.6	85.3297
2942.73	84.6788
2940.87	83.692
2939.01	82.5774
2937.14	81.3817
2935.28	80.2005
2933.41	78.9501
2931.55	77.6973
2929.69	76.6726
2927.82	75.6442
2925.96	74.6993
2924.1	74.0724
2922.23	73.5765
2920.37	73.3031
2918.51	73.3226
2916.64	73.5215
2914.78	73.9516
2912.91	74.5641
2911.05	75.2649
2909.19	75.9965
2907.32	76.7833
2905.46	77.5199
2903.6	78.0015
2901.73	78.4428
2899.87	78.9956
2898.01	79.5573
2896.14	79.9971
2894.28	80.1709
2892.41	80.2275
2890.55	80.266
2888.69	80.288
2886.82	80.4234
2884.96	80.6376
2883.1	80.8269
2881.23	80.9246
2879.37	80.9323
2877.5	80.8366
2875.64	80.6457
2873.78	80.6492
2871.91	81.0113
2870.05	81.679
2868.19	82.4506
2866.32	82.9225
2864.46	83.1492
2862.6	83.3097
2860.73	82.9204
2858.87	82.1271
2857	81.5834
2855.14	81.5488
2853.28	81.8728
2851.41	82.3974
2849.55	83.1871
2847.69	84.0154
2845.82	84.6773
2843.96	85.0819
2842.1	85.101
2840.23	84.9912
2838.37	84.8668
2836.5	84.7578
2834.64	84.7794
2832.78	84.9595
2830.91	85.6165
2829.05	86.6539
2827.19	87.8149
2825.32	88.9718
2823.46	89.7971
2821.59	90.2329
2819.73	90.5341
2817.87	91.083
2816	91.725
2814.14	92.3032
2812.28	93.0199
2810.41	93.6968
2808.55	94.2412
2806.69	94.9021
2804.82	95.5522
2802.96	95.9892
2801.09	96.3056
2799.23	96.6475
2797.37	97.0484
2795.5	97.34
2793.64	97.5371
2791.78	97.6682
2789.91	97.7976
2788.05	97.9122
2786.19	97.9671
2784.32	98.0719
2782.46	98.1941
2780.59	98.2563
2778.73	98.2237
2776.87	98.3766
2775	98.631
2773.14	98.6495
2771.28	98.5844
2769.41	98.5497
2767.55	98.5759
2765.68	98.6256
2763.82	98.5666
2761.96	98.5647
2760.09	98.6658
2758.23	98.6805
2756.37	98.572
2754.5	98.5348
2752.64	98.6113
2750.78	98.6278
2748.91	98.5902
2747.05	98.5669
2745.18	98.5437
2743.32	98.4976
2741.46	98.5603
2739.59	98.6355
2737.73	98.544
2735.87	98.4329
2734	98.4465
2732.14	98.4511
2730.27	98.2657
2728.41	98.0776
2726.55	97.9917
2724.68	97.9479
2722.82	98.0022
2720.96	98.1585
2719.09	98.3725
2717.23	98.549
2715.37	98.6457
2713.5	98.7217
2711.64	98.8111
2709.77	98.8323
2707.91	98.9022
2706.05	98.9972
2704.18	98.9747
2702.32	98.9639
2700.46	98.9976
2698.59	99.0587
2696.73	99.1389
2694.87	99.1596
2693	99.1158
2691.14	99.1039
2689.27	99.1576
2687.41	99.2244
2685.55	99.2497
2683.68	99.2499
2681.82	99.1701
2679.96	99.1012
2678.09	99.1059
2676.23	99.0843
2674.36	99.0576
2672.5	99.0711
2670.64	99.0546
2668.77	99.0483
2666.91	99.0475
2665.05	98.996
2663.18	99.0262
2661.32	99.0717
2659.46	99.008
2657.59	99.0186
2655.73	99.161
2653.86	99.1829
2652	99.1436
2650.14	99.1522
2648.27	99.2125
2646.41	99.3375
2644.55	99.3461
2642.68	99.2653
2640.82	99.2819
2638.96	99.2899
2637.09	99.239
2635.23	99.2632
2633.36	99.3402
2631.5	99.3842
2629.64	99.4071
2627.77	99.4235
2625.91	99.3668
2624.05	99.2477
2622.18	99.189
2620.32	99.2257
2618.45	99.2531
2616.59	99.2122
2614.73	99.2348
2612.86	99.2918
2611	99.2122
2609.14	99.1015
2607.27	99.1824
2605.41	99.3384
2603.55	99.3853
2601.68	99.3176
2599.82	99.2556
2597.95	99.3354
2596.09	99.3871
2594.23	99.2946
2592.36	99.2714
2590.5	99.2558
2588.64	99.1874
2586.77	99.1961
2584.91	99.3074
2583.05	99.4257
2581.18	99.4738
2579.32	99.4017
2577.45	99.2975
2575.59	99.2395
2573.73	99.2342
2571.86	99.3084
2570	99.3969
2568.14	99.4427
2566.27	99.371
2564.41	99.1026
2562.54	99.0594
2560.68	99.4048
2558.82	99.3726
2556.95	99.0631
2555.09	99.1281
2553.23	99.3732
2551.36	99.5361
2549.5	99.5978
2547.64	99.4397
2545.77	99.2116
2543.91	99.3855
2542.04	99.6533
2540.18	99.5152
2538.32	99.3672
2536.45	99.3585
2534.59	99.339
2532.73	99.6137
2530.86	99.8018
2529	99.601
2527.14	99.4702
2525.27	99.4468
2523.41	99.4188
2521.54	99.4919
2519.68	99.4683
2517.82	99.4509
2515.95	99.5061
2514.09	99.5468
2512.23	99.6131
2510.36	99.572
2508.5	99.513
2506.63	99.5395
2504.77	99.4782
2502.91	99.3314
2501.04	99.3107
2499.18	99.5392
2497.32	99.5992
2495.45	99.4994
2493.59	99.5297
2491.73	99.6193
2489.86	99.5901
2488	99.4325
2486.13	99.3407
2484.27	99.4031
2482.41	99.5172
2480.54	99.5732
2478.68	99.5434
2476.82	99.4408
2474.95	99.4295
2473.09	99.4622
2471.22	99.3137
2469.36	99.3219
2467.5	99.4909
2465.63	99.4411
2463.77	99.3864
2461.91	99.6071
2460.04	99.624
2458.18	99.4721
2456.32	99.4052
2454.45	99.3165
2452.59	99.4666
2450.72	99.6505
2448.86	99.6473
2447	99.4663
2445.13	99.4392
2443.27	99.5911
2441.41	99.5828
2439.54	99.5985
2437.68	99.7953
2435.82	99.719
2433.95	99.5791
2432.09	99.5778
2430.22	99.5837
2428.36	99.614
2426.5	99.5379
2424.63	99.579
2422.77	99.6751
2420.91	99.6213
2419.04	99.5802
2417.18	99.6794
2415.31	99.6422
2413.45	99.5135
2411.59	99.6196
2409.72	99.7845
2407.86	99.6755
2406	99.4927
2404.13	99.557
2402.27	99.6339
2400.41	99.5477
2398.54	99.5044
2396.68	99.5968
2394.81	99.6898
2392.95	99.6765
2391.09	99.6086
2389.22	99.513
2387.36	99.6515
2385.5	99.7933
2383.63	99.6267
2381.77	99.5282
2379.91	99.6153
2378.04	99.6989
2376.18	99.8125
2374.31	99.7493
2372.45	99.5721
2370.59	99.5621
2368.72	99.6031
2366.86	99.5397
2365	99.3958
2363.13	99.371
2361.27	99.4768
2359.4	99.5277
2357.54	99.7257
2355.68	99.6987
2353.81	99.5881
2351.95	99.5661
2350.09	99.4759
2348.22	99.5005
2346.36	99.6085
2344.5	99.6732
2342.63	99.6634
2340.77	99.5767
2338.9	99.6332
2337.04	99.7338
2335.18	99.6729
2333.31	99.6355
2331.45	99.6761
2329.59	99.6588
2327.72	99.6422
2325.86	99.6392
2324	99.696
2322.13	99.8143
2320.27	99.819
2318.4	99.7708
2316.54	99.7655
2314.68	99.8347
2312.81	99.8418
2310.95	99.7954
2309.09	99.7513
2307.22	99.6214
2305.36	99.5771
2303.49	99.6735
2301.63	99.6725
2299.77	99.5913
2297.9	99.6828
2296.04	99.7869
2294.18	99.8148
2292.31	99.778
2290.45	99.6735
2288.59	99.6877
2286.72	99.6321
2284.86	99.6671
2282.99	99.7585
2281.13	99.6876
2279.27	99.6718
2277.4	99.7582
2275.54	99.7435
2273.68	99.6662
2271.81	99.6141
2269.95	99.5503
2268.09	99.6617
2266.22	99.6229
2264.36	99.6856
2262.49	100.037
2260.63	99.9492
2258.77	99.5668
2256.9	99.418
2255.04	99.4775
2253.18	99.601
2251.31	99.7679
2249.45	99.8364
2247.58	99.6809
2245.72	99.3608
2243.86	99.2121
2241.99	99.2193
2240.13	99.5138
2238.27	99.9188
2236.4	99.7949
2234.54	99.6311
2232.68	99.9717
2230.81	100.21
2228.95	100.027
2227.08	99.8952
2225.22	99.8017
2223.36	99.8525
2221.49	99.7793
2219.63	99.8028
2217.77	99.9031
2215.9	99.6493
2214.04	99.4369
2212.18	99.5389
2210.31	99.6707
2208.45	99.8314
2206.58	99.8641
2204.72	99.8465
2202.86	99.5063
2200.99	99.4919
2199.13	100.079
2197.27	99.9317
2195.4	99.183
2193.54	99.199
2191.67	99.9115
2189.81	100.419
2187.95	100.599
2186.08	100.326
2184.22	100.014
2182.36	99.6496
2180.49	99.7526
2178.63	100.044
2176.77	100.114
2174.9	99.963
2173.04	99.4398
2171.17	99.666
2169.31	100.052
2167.45	99.8704
2165.58	99.8335
2163.72	99.817
2161.86	99.8411
2159.99	100.267
2158.13	100.452
2156.26	99.7578
2154.4	99.4591
2152.54	99.8114
2150.67	99.8257
2148.81	99.7154
2146.95	99.7767
2145.08	99.6267
2143.22	99.6443
2141.36	99.8361
2139.49	99.9515
2137.63	100.077
2135.76	99.891
2133.9	99.8441
2132.04	99.775
2130.17	99.5543
2128.31	99.9712
2126.45	100.247
2124.58	99.9303
2122.72	99.6701
2120.86	99.5832
2118.99	99.5742
2117.13	99.7
2115.26	99.9201
2113.4	100.012
2111.54	99.9167
2109.67	99.8522
2107.81	100.047
2105.95	99.9869
2104.08	99.6957
2102.22	99.8518
2100.35	100.119
2098.49	100.089
2096.63	99.9675
2094.76	99.9113
2092.9	100.157
2091.04	99.9079
2089.17	99.5017
2087.31	99.7257
2085.45	99.7477
2083.58	99.56
2081.72	99.7003
2079.85	99.8638
2077.99	100.039
2076.13	99.981
2074.26	99.7765
2072.4	99.7673
2070.54	100.079
2068.67	100.385
2066.81	100.238
2064.95	99.8433
2063.08	99.5266
2061.22	99.3848
2059.35	99.4644
2057.49	99.7849
2055.63	100.034
2053.76	100.037
2051.9	100.154
2050.04	100.035
2048.17	99.9707
2046.31	100.342
2044.44	100.468
2042.58	100.163
2040.72	99.9417
2038.85	100.144
2036.99	100.227
2035.13	100.198
2033.26	99.9337
2031.4	99.8951
2029.54	100.517
2027.67	101.216
2025.81	101.307
2023.94	100.378
2022.08	99.874
2020.22	100.146
2018.35	100.208
2016.49	99.949
2014.63	99.6558
2012.76	99.4794
2010.9	99.4733
2009.04	99.7444
2007.17	99.9286
2005.31	99.827
2003.44	99.7123
2001.58	99.5967
1999.72	99.6953
1997.85	99.7337
1995.99	99.761
1994.13	99.8365
1992.26	99.9862
1990.4	100.115
1988.53	99.7289
1986.67	99.3162
1984.81	99.3184
1982.94	99.5424
1981.08	100.086
1979.22	100.227
1977.35	100.422
1975.49	100.963
1973.63	101.11
1971.76	100.925
1969.9	100.699
1968.03	100.229
1966.17	99.444
1964.31	98.9272
1962.44	99.2364
1960.58	99.6784
1958.72	99.6765
1956.85	99.6642
1954.99	99.565
1953.13	99.382
1951.26	99.6068
1949.4	100.21
1947.53	100.131
1945.67	99.5567
1943.81	99.3208
1941.94	99.5477
1940.08	99.7096
1938.22	99.6974
1936.35	99.7115
1934.49	99.8647
1932.62	99.779
1930.76	99.648
1928.9	99.8067
1927.03	99.6939
1925.17	99.6859
1923.31	99.9294
1921.44	100.217
1919.58	99.9981
1917.72	99.5702
1915.85	99.528
1913.99	99.6367
1912.12	99.7871
1910.26	99.7644
1908.4	99.8617
1906.53	99.936
1904.67	99.7836
1902.81	99.6764
1900.94	99.7137
1899.08	99.8812
1897.21	99.9244
1895.35	99.5951
1893.49	99.4312
1891.62	99.5825
1889.76	99.7468
1887.9	99.7552
1886.03	99.9331
1884.17	100.05
1882.31	99.9179
1880.44	99.7877
1878.58	99.608
1876.71	99.5683
1874.85	99.6491
1872.99	99.7258
1871.12	99.7738
1869.26	99.6914
1867.4	99.6768
1865.53	99.7257
1863.67	99.7021
1861.81	99.5747
1859.94	99.5593
1858.08	99.6527
1856.21	99.6579
1854.35	99.5606
1852.49	99.6031
1850.62	99.6404
1848.76	99.629
1846.9	99.7525
1845.03	99.7168
1843.17	99.5284
1841.3	99.5866
1839.44	99.6789
1837.58	99.6185
1835.71	99.5656
1833.85	99.7083
1831.99	99.8689
1830.12	99.7436
1828.26	99.575
1826.4	99.6408
1824.53	99.7204
1822.67	99.6445
1820.8	99.658
1818.94	99.7602
1817.08	99.8606
1815.21	99.7081
1813.35	99.492
1811.49	99.4969
1809.62	99.4932
1807.76	99.4469
1805.9	99.4464
1804.03	99.4856
1802.17	99.5064
1800.3	99.4132
1798.44	99.3152
1796.58	99.1901
1794.71	99.1953
1792.85	99.2406
1790.99	99.0996
1789.12	98.9725
1787.26	98.9482
1785.39	98.857
1783.53	98.726
1781.67	98.6795
1779.8	98.683
1777.94	98.64
1776.08	98.6573
1774.21	98.8485
1772.35	98.9571
1770.49	99.0041
1768.62	99.0919
1766.76	99.0905
1764.89	99.0784
1763.03	99.0892
1761.17	99.0177
1759.3	98.9209
1757.44	98.8206
1755.58	98.7031
1753.71	98.5688
1751.85	98.2941
1749.99	98.0374
1748.12	97.9088
1746.26	97.7683
1744.39	97.5188
1742.53	97.3975
1740.67	97.5286
1738.8	97.5677
1736.94	97.6442
1735.08	97.6607
1733.21	97.535
1731.35	97.6689
1729.48	97.8119
1727.62	97.8658
1725.76	97.9752
1723.89	98.0162
1722.03	98.0506
1720.17	98.0994
1718.3	97.9853
1716.44	97.8816
1714.58	97.8648
1712.71	97.8333
1710.85	97.8323
1708.98	97.9243
1707.12	98.0122
1705.26	97.9789
1703.39	97.9476
1701.53	97.7268
1699.67	97.1368
1697.8	96.7718
1695.94	96.253
1694.08	95.7818
1692.21	95.6131
1690.35	95.7188
1688.48	96.0784
1686.62	96.3287
1684.76	96.5852
1682.89	97.0322
1681.03	97.3041
1679.17	97.3498
1677.3	97.3787
1675.44	97.4227
1673.57	97.4785
1671.71	97.6164
1669.85	97.7454
1667.98	97.7425
1666.12	97.7159
1664.26	97.6583
1662.39	97.5011
1660.53	97.2265
1658.67	96.8276
1656.8	96.4591
1654.94	96.1893
1653.07	94.7959
1651.21	93.0474
1649.35	91.5733
1647.48	89.0644
1645.62	86.3069
1643.76	85.4423
1641.89	86.1598
1640.03	87.7895
1638.16	89.3617
1636.3	90.9423
1634.44	92.717
1632.57	93.7499
1630.71	94.3368
1628.85	94.8347
1626.98	95.3794
1625.12	95.7899
1623.26	96.1798
1621.39	96.5511
1619.53	96.798
1617.66	96.8729
1615.8	96.7549
1613.94	96.6617
1612.07	96.5286
1610.21	96.31
1608.35	96.0166
1606.48	95.8676
1604.62	95.9342
1602.76	96.0896
1600.89	96.2178
1599.03	96.2573
1597.16	96.2536
1595.3	96.2781
1593.44	96.3137
1591.57	96.4034
1589.71	96.459
1587.85	96.4781
1585.98	96.4406
1584.12	96.455
1582.25	96.592
1580.39	96.8056
1578.53	97.1018
1576.66	97.3767
1574.8	97.5374
1572.94	97.6698
1571.07	97.7854
1569.21	97.8317
1567.35	97.9525
1565.48	98.116
1563.62	98.297
1561.75	98.479
1559.89	98.4853
1558.03	98.5803
1556.16	98.8151
1554.3	98.7824
1552.44	98.7548
1550.57	98.7886
1548.71	98.8742
1546.85	99.0328
1544.98	99.0123
1543.12	99.0051
1541.25	99.0495
1539.39	98.7727
1537.53	98.7153
1535.66	98.8734
1533.8	98.8971
1531.94	98.7665
1530.07	98.704
1528.21	98.663
1526.34	98.3456
1524.48	97.8114
1522.62	97.2961
1520.75	96.5847
1518.89	96.0875
1517.03	95.6605
1515.16	95.3361
1513.3	95.391
1511.44	95.8373
1509.57	96.4364
1507.71	96.9029
1505.84	97.3759
1503.98	97.7141
1502.12	97.8595
1500.25	97.9134
1498.39	97.9166
1496.53	97.8279
1494.66	97.734
1492.8	97.7439
1490.94	97.7334
1489.07	97.5193
1487.21	97.1619
1485.34	96.8012
1483.48	96.3801
1481.62	95.859
1479.75	95.4355
1477.89	95.1507
1476.03	94.8695
1474.16	94.434
1472.3	93.3866
1470.43	91.965
1468.57	90.539
1466.71	89.2092
1464.84	88.1347
1462.98	87.534
1461.12	86.9718
1459.25	86.1554
1457.39	84.641
1455.53	82.867
1453.66	81.6087
1451.8	80.7983
1449.93	80.3851
1448.07	80.1629
1446.21	80.0501
1444.34	79.8783
1442.48	79.3755
1440.62	78.5078
1438.75	77.2466
1436.89	76.1838
1435.03	76.7324
1433.16	78.1351
1431.3	79.7678
1429.43	81.8726
1427.57	84.0348
1425.71	85.8794
1423.84	87.7896
1421.98	89.426
1420.12	90.5454
1418.25	91.8096
1416.39	92.8475
1414.52	93.3952
1412.66	93.4849
1410.8	93.3017
1408.93	93.1124
1407.07	93.2425
1405.21	93.7073
1403.34	94.3373
1401.48	94.8236
1399.62	95.1433
1397.75	95.2782
1395.89	95.2778
1394.02	95.1871
1392.16	95.0298
1390.3	94.719
1388.43	94.2265
1386.57	93.3607
1384.71	92.2696
1382.84	90.9388
1380.98	89.0547
1379.11	86.2665
1377.25	83.8162
1375.39	83.1186
1373.52	84.1077
1371.66	85.4865
1369.8	86.6899
1367.93	87.7677
1366.07	88.5679
1364.21	88.9326
1362.34	89.2492
1360.48	90.0255
1358.61	91.1969
1356.75	92.3181
1354.89	93.2362
1353.02	93.915
1351.16	94.5222
1349.3	95.0771
1347.43	95.5081
1345.57	95.7707
1343.71	95.8897
1341.84	95.9498
1339.98	95.9298
1338.11	95.6451
1336.25	95.2149
1334.39	94.8386
1332.52	94.6302
1330.66	94.6589
1328.8	94.8694
1326.93	95.1553
1325.07	95.5076
1323.2	95.9057
1321.34	96.2421
1319.48	96.3828
1317.61	96.3762
1315.75	96.2145
1313.89	95.8654
1312.02	95.4181
1310.16	95.0867
1308.3	94.9652
1306.43	94.9681
1304.57	95.0114
1302.7	95.1338
1300.84	95.3602
1298.98	95.6653
1297.11	95.8312
1295.25	95.8006
1293.39	95.628
1291.52	95.3348
1289.66	95.0143
1287.8	94.8532
1285.93	94.8404
1284.07	95.0083
1282.2	95.1944
1280.34	95.1825
1278.48	94.9699
1276.61	94.5959
1274.75	94.2239
1272.89	94.0369
1271.02	93.9272
1269.16	93.7447
1267.29	93.4348
1265.43	92.7726
1263.57	91.6286
1261.7	90.5495
1259.84	90.2755
1257.98	90.9309
1256.11	91.9697
1254.25	92.8287
1252.39	93.3093
1250.52	93.4284
1248.66	93.1627
1246.79	92.7017
1244.93	92.3412
1243.07	92.2895
1241.2	92.4801
1239.34	92.7656
1237.48	93.089
1235.61	93.4234
1233.75	93.6911
1231.89	93.8683
1230.02	93.8823
1228.16	93.8636
1226.29	93.9713
1224.43	94.2784
1222.57	94.6586
1220.7	94.9372
1218.84	95.1975
1216.98	95.4116
1215.11	95.5488
1213.25	95.6864
1211.38	95.7069
1209.52	95.5832
1207.66	95.4143
1205.79	95.3233
1203.93	95.3402
1202.07	95.2805
1200.2	95.0401
1198.34	94.8625
1196.48	94.9602
1194.61	95.2159
1192.75	95.3863
1190.88	95.4417
1189.02	95.5396
1187.16	95.646
1185.29	95.5738
1183.43	95.307
1181.57	95.0103
1179.7	94.7131
1177.84	94.5258
1175.98	94.38
1174.11	94.2238
1172.25	94.3679
1170.38	94.775
1168.52	95.0129
1166.66	94.9536
1164.79	94.5918
1162.93	93.9754
1161.07	93.2007
1159.2	92.2369
1157.34	91.1286
1155.47	90.4358
1153.61	90.7703
1151.75	91.4261
1149.88	91.2173
1148.02	90.4953
1146.16	90.6892
1144.29	91.9859
1142.43	93.4345
1140.57	94.3869
1138.7	94.8739
1136.84	95.1766
1134.97	95.3512
1133.11	95.3077
1131.25	95.1917
1129.38	95.0152
1127.52	94.8044
1125.66	94.7375
1123.79	94.6537
1121.93	94.4163
1120.07	94.0012
1118.2	93.4952
1116.34	93.0242
1114.47	92.5459
1112.61	92.1483
1110.75	91.8852
1108.88	91.6915
1107.02	91.6984
1105.16	91.9533
1103.29	92.2838
1101.43	92.5316
1099.56	92.7702
1097.7	92.9801
1095.84	93.1137
1093.97	93.0723
1092.11	92.7604
1090.25	92.5197
1088.38	92.5888
1086.52	92.7107
1084.66	92.6544
1082.79	92.3594
1080.93	91.8714
1079.06	91.4492
1077.2	91.3587
1075.34	91.6314
1073.47	92.2519
1071.61	93.1355
1069.75	93.9259
1067.88	94.3422
1066.02	94.5268
1064.15	94.6152
1062.29	94.5761
1060.43	94.4072
1058.56	94.1258
1056.7	93.5841
1054.84	92.7484
1052.97	91.774
1051.11	91.0755
1049.25	91.0674
1047.38	91.4924
1045.52	91.7835
1043.65	91.7792
1041.79	91.5328
1039.93	91.1868
1038.06	90.9908
1036.2	90.8749
1034.34	90.7576
1032.47	90.6378
1030.61	90.4736
1028.75	90.3339
1026.88	90.2204
1025.02	90.0031
1023.15	89.6789
1021.29	89.2273
1019.43	88.6163
1017.56	88.0917
1015.7	88.0689
1013.84	88.6936
1011.97	89.6217
1010.11	90.685
1008.24	91.9285
1006.38	93.1158
1004.52	93.9827
1002.65	94.6307
1000.79	95.0444
998.927	95.1581
997.063	95.2247
995.199	95.2887
993.336	95.2139
991.472	95.0186
989.608	94.7685
987.745	94.5981
985.881	94.6669
984.017	94.8852
982.154	95.1424
980.29	95.3649
978.426	95.5544
976.563	95.7259
974.699	95.8941
972.835	96.048
970.972	96.0941
969.108	96.0136
967.244	95.8109
965.38	95.4579
963.517	94.8923
961.653	94.0586
959.789	93.0039
957.926	92.1314
956.062	91.932
954.198	92.2369
952.335	92.0438
950.471	90.946
948.607	89.8132
946.744	89.6666
944.88	90.6417
943.016	92.1651
941.153	93.6574
939.289	94.8065
937.425	95.5664
935.562	96.0694
933.698	96.349
931.834	96.4292
929.971	96.4075
928.107	96.2447
926.243	95.8609
924.38	95.3612
922.516	94.5755
920.652	93.4188
918.789	91.967
916.925	89.4753
915.061	86.5515
913.198	86.2038
911.334	88.752
909.47	91.4137
907.607	92.7502
905.743	93.1171
903.879	92.7811
902.016	91.9289
900.152	90.7162
898.288	88.7441
896.425	85.749
894.561	81.729
892.697	76.5151
890.834	70.2935
888.97	63.9271
887.106	59.4074
885.243	59.035
883.379	63.3285
881.515	70.3399
879.652	77.2987
877.788	82.7819
875.924	86.6561
874.061	89.3032
872.197	91.1248
870.333	92.5409
868.47	93.6507
866.606	94.3789
864.742	94.875
862.879	95.247
861.015	95.5789
859.151	95.8261
857.288	95.8108
855.424	95.7964
853.56	95.8016
851.697	95.8169
849.833	95.869
847.969	95.9269
846.106	95.9301
844.242	95.9049
842.378	95.8336
840.515	95.6566
838.651	95.4445
836.787	95.1315
834.924	94.7785
833.06	94.7981
831.196	95.1869
829.333	95.4294
827.469	95.4003
825.605	95.1914
823.742	94.9181
821.878	94.6721
820.014	94.3885
818.151	93.8217
816.287	93.1445
814.423	92.5604
812.56	92.2165
810.696	91.8093
808.832	90.8979
806.969	89.499
805.105	87.6794
803.241	85.5677
801.378	83.1988
799.514	80.6983
797.65	78.7933
795.787	79.5082
793.923	83.0265
792.059	86.1893
790.196	86.8359
788.332	86.4414
786.468	87.1018
784.605	87.6368
782.741	87.2688
780.877	87.6771
779.014	89.8266
777.15	92.6434
775.286	94.647
773.423	95.6638
771.559	96.2273
769.695	96.5621
767.832	96.7025
765.968	96.6366
764.104	96.164
762.241	95.5908
760.377	95.1974
758.513	94.8185
756.65	94.8551
754.786	95.4109
752.922	95.7971
751.059	95.697
749.195	95.5838
747.331	96.016
745.468	96.8389
743.604	97.3564
741.74	97.5515
739.877	97.6999
738.013	97.7673
736.149	97.8389
734.286	97.8416
732.422	97.7564
730.558	97.6092
728.695	97.4512
726.831	97.3193
724.967	97.3291
723.104	97.3624
721.24	97.1949
719.376	97.117
717.513	97.2456
715.649	97.5362
713.785	97.6504
711.922	97.7132
710.058	97.8315
708.194	97.862
706.331	97.7703
704.467	97.4552
702.603	97.1652
700.74	97.3013
698.876	97.635
697.012	97.8485
695.149	98.0706
693.285	98.0855
691.421	98.0533
689.557	98.1144
687.694	98.1884
685.83	98.2793
683.966	98.3244
682.103	98.2312
680.239	98.2271
678.375	98.2603
676.512	98.3969
674.648	98.5628
672.784	98.5996
670.921	98.5186
669.057	98.305
667.193	98.0996
665.33	98.1346
663.466	98.1441
661.602	98.2866
659.739	98.5267
657.875	98.6525
656.011	98.5065
654.148	98.538
652.284	98.6572
650.42	98.6142
648.557	98.4417
646.693	98.413
644.829	98.3309
642.966	97.9259
641.102	97.4624
639.238	97.4129
637.375	97.7583
635.511	98.0252
633.647	98.3156
631.784	98.5468
629.92	98.5941
628.056	98.5321
626.193	98.5575
624.329	98.7604
622.465	98.7974
620.602	98.536
618.738	98.4505
616.874	98.6163
615.011	98.4688
613.147	98.294
611.283	98.3919
609.42	98.3711
607.556	98.1217
605.692	98.1221
603.829	98.2598
601.965	98.239
600.101	98.3609
598.238	98.2932
596.374	98.1538
594.51	97.9929
592.647	97.9395
590.783	97.8327
588.919	97.9159
587.056	97.8519
585.192	97.4688
583.328	97.3784
581.465	97.4359
579.601	97.5409
577.737	97.3618
575.874	97.1199
574.01	97.1599
572.146	97.2503
570.283	96.8757
568.419	96.6375
566.555	96.7053
564.692	96.7408
562.828	97.1484
560.964	97.2043
559.101	96.6965
557.237	96.3581
555.373	96.2457
553.51	95.9377
551.646	95.4981
549.782	94.9202
547.919	93.7482
546.055	92.3851
544.191	91.0992
542.328	90.4172
540.464	90.3674
538.6	90.9916
536.737	91.9109
534.873	92.5711
533.009	92.7803
531.146	92.8945
529.282	93.066
527.418	93.391
525.555	93.711
523.691	92.8344
521.827	92.1354
519.964	92.8999
518.1	94.1536
516.236	94.9796
514.373	95.2736
512.509	95.6422
510.645	96.0876
508.782	95.9986
506.918	95.7959
505.054	95.6372
503.191	95.7543
501.327	95.9256
499.463	95.6035
497.6	95.2998
495.736	95.1181
493.872	94.952
492.009	94.9398
490.145	94.8868
488.281	94.6997
486.418	94.7248
484.554	95.0828
482.69	95.8054
480.827	95.7842
478.963	95.468
477.099	95.8258
475.236	96.0518
473.372	95.4734
471.508	94.7318
469.645	95.0177
467.781	95.4533
465.917	95.5353
464.054	96.7261
462.19	97.9739
460.326	97.7521
458.463	97.6105
456.599	97.4616
454.735	97.2987
452.872	96.5922
451.008	96.9884
449.144	97.5159
447.281	97.5278
445.417	96.7916
443.553	95.4703
441.69	94.5191
439.826	94.4986
437.962	94.9692
436.099	94.8157
434.235	91.6435
432.371	88.374
430.508	86.4293
428.644	85.5149
426.78	87.2752
424.917	89.3184
423.053	91.5258
421.189	92.9507
419.326	94.5892
417.462	94.2091
415.598	94.5873
413.734	96.7232
411.871	95.6175
410.007	93.2169
408.143	94.5235
406.28	98.7186
404.416	98.9881
402.552	97.7245
400.689	94.7806

## Sheet: FTIR-Aceite w hexano
wavenumber	%Transmittance
3999.43	99.3965
3997.57	99.3976
3995.71	99.4619
3993.84	99.5074
3991.98	99.354
3990.12	99.2571
3988.25	99.3055
3986.39	99.279
3984.52	99.1521
3982.66	99.303
3980.8	99.536
3978.93	99.6541
3977.07	99.6442
3975.21	99.4224
3973.34	99.4325
3971.48	99.5806
3969.61	99.41
3967.75	99.2377
3965.89	99.193
3964.02	99.2166
3962.16	99.291
3960.3	99.249
3958.43	99.1332
3956.57	99.178
3954.71	99.3451
3952.84	99.3689
3950.98	99.4011
3949.11	99.4631
3947.25	99.3331
3945.39	99.2997
3943.52	99.4537
3941.66	99.502
3939.8	99.4243
3937.93	99.2272
3936.07	99.1518
3934.21	99.2513
3932.34	99.3854
3930.48	99.4905
3928.61	99.4524
3926.75	99.4207
3924.89	99.4433
3923.02	99.3085
3921.16	99.2194
3919.3	99.3671
3917.43	99.4462
3915.57	99.2725
3913.7	99.2511
3911.84	99.3923
3909.98	99.3564
3908.11	99.2201
3906.25	99.2865
3904.39	99.4659
3902.52	99.5838
3900.66	99.4683
3898.8	99.3388
3896.93	99.4273
3895.07	99.386
3893.2	99.3075
3891.34	99.32
3889.48	99.132
3887.61	99.0722
3885.75	99.217
3883.89	99.2848
3882.02	99.3056
3880.16	99.4136
3878.3	99.4195
3876.43	99.2089
3874.57	99.2297
3872.7	99.3304
3870.84	99.3576
3868.98	99.3237
3867.11	99.3378
3865.25	99.2853
3863.39	99.3356
3861.52	99.6074
3859.66	99.5875
3857.79	99.4359
3855.93	99.3805
3854.07	99.4614
3852.2	99.4475
3850.34	99.4626
3848.48	99.5362
3846.61	99.5137
3844.75	99.378
3842.89	99.2972
3841.02	99.3778
3839.16	99.5308
3837.29	99.5538
3835.43	99.5636
3833.57	99.5536
3831.7	99.6719
3829.84	99.6696
3827.98	99.6664
3826.11	99.6735
3824.25	99.4928
3822.38	99.3533
3820.52	99.3693
3818.66	99.3672
3816.79	99.5642
3814.93	99.5565
3813.07	99.3909
3811.2	99.3541
3809.34	99.4217
3807.48	99.6004
3805.61	99.4167
3803.75	99.2109
3801.88	99.6615
3800.02	99.7161
3798.16	99.458
3796.29	99.4236
3794.43	99.4355
3792.57	99.3875
3790.7	99.3856
3788.84	99.4191
3786.98	99.492
3785.11	99.6153
3783.25	99.5419
3781.38	99.3929
3779.52	99.4692
3777.66	99.5196
3775.79	99.4559
3773.93	99.363
3772.07	99.2772
3770.2	99.2557
3768.34	99.313
3766.47	99.4589
3764.61	99.4631
3762.75	99.5059
3760.88	99.7651
3759.02	99.7011
3757.16	99.4939
3755.29	99.3629
3753.43	99.3961
3751.57	99.7259
3749.7	99.7945
3747.84	99.4658
3745.97	99.5765
3744.11	99.6871
3742.25	99.7282
3740.38	99.6896
3738.52	99.3827
3736.66	99.6018
3734.79	99.8306
3732.93	99.7452
3731.07	99.6165
3729.2	99.4687
3727.34	99.4612
3725.47	99.4646
3723.61	99.3234
3721.75	99.2609
3719.88	99.5781
3718.02	99.6921
3716.16	99.4026
3714.29	99.3537
3712.43	99.563
3710.56	99.5734
3708.7	99.488
3706.84	99.5973
3704.97	99.7349
3703.11	99.7436
3701.25	99.6161
3699.38	99.4631
3697.52	99.4296
3695.66	99.4638
3693.79	99.5644
3691.93	99.5586
3690.06	99.6575
3688.2	99.6779
3686.34	99.5856
3684.47	99.5735
3682.61	99.5245
3680.75	99.6525
3678.88	99.6074
3677.02	99.502
3675.16	99.7081
3673.29	99.6023
3671.43	99.3338
3669.56	99.2775
3667.7	99.2593
3665.84	99.2756
3663.97	99.3671
3662.11	99.402
3660.25	99.51
3658.38	99.6022
3656.52	99.6178
3654.65	99.3596
3652.79	99.2223
3650.93	99.3452
3649.06	99.4013
3647.2	99.5949
3645.34	99.736
3643.47	99.7295
3641.61	99.6017
3639.75	99.4142
3637.88	99.2206
3636.02	99.2246
3634.15	99.3887
3632.29	99.3092
3630.43	99.2794
3628.56	99.4939
3626.7	99.6127
3624.84	99.4791
3622.97	99.2842
3621.11	99.1269
3619.25	99.1851
3617.38	99.4155
3615.52	99.3802
3613.65	99.2547
3611.79	99.2963
3609.93	99.3646
3608.06	99.228
3606.2	99.2325
3604.34	99.542
3602.47	99.6076
3600.61	99.4407
3598.74	99.3579
3596.88	99.1818
3595.02	99.011
3593.15	99.0347
3591.29	99.0479
3589.43	99.1519
3587.56	99.264
3585.7	99.4428
3583.84	99.5709
3581.97	99.3051
3580.11	99.0601
3578.24	99.2194
3576.38	99.4239
3574.52	99.3833
3572.65	99.0155
3570.79	98.5806
3568.93	98.7154
3567.06	98.999
3565.2	98.9123
3563.33	98.9949
3561.47	99.0632
3559.61	98.8679
3557.74	98.6495
3555.88	98.7694
3554.02	98.9189
3552.15	99.0301
3550.29	99.2761
3548.43	99.0868
3546.56	98.6844
3544.7	98.6703
3542.83	98.8624
3540.97	99.0822
3539.11	99.021
3537.24	98.7625
3535.38	98.6958
3533.52	98.8947
3531.65	99.0553
3529.79	99.0047
3527.93	98.9164
3526.06	98.8787
3524.2	98.942
3522.33	98.9883
3520.47	99.0903
3518.61	99.0212
3516.74	98.824
3514.88	98.7208
3513.02	98.6335
3511.15	98.8937
3509.29	99.2803
3507.42	99.1621
3505.56	98.8893
3503.7	98.8814
3501.83	98.7945
3499.97	98.7824
3498.11	98.753
3496.24	98.609
3494.38	98.6405
3492.52	98.8704
3490.65	98.8317
3488.79	98.6917
3486.92	98.67
3485.06	98.6678
3483.2	98.824
3481.33	98.8086
3479.47	98.5591
3477.61	98.7686
3475.74	99.2561
3473.88	99.3086
3472.02	98.9026
3470.15	98.636
3468.29	98.726
3466.42	98.7214
3464.56	98.486
3462.7	98.5021
3460.83	98.589
3458.97	98.7053
3457.11	98.8147
3455.24	98.7538
3453.38	98.5521
3451.51	98.4936
3449.65	98.5851
3447.79	98.6373
3445.92	98.7992
3444.06	99.2113
3442.2	99.1584
3440.33	98.831
3438.47	98.7473
3436.61	98.6891
3434.74	98.6121
3432.88	98.5935
3431.01	98.8664
3429.15	99.1252
3427.29	98.9274
3425.42	98.6302
3423.56	98.7626
3421.7	98.8914
3419.83	98.7295
3417.97	98.5206
3416.11	98.4878
3414.24	98.6724
3412.38	98.6954
3410.51	98.5573
3408.65	98.6428
3406.79	98.839
3404.92	98.7976
3403.06	98.8339
3401.2	98.8483
3399.33	98.6462
3397.47	98.7716
3395.6	99.1243
3393.74	99.1289
3391.88	98.9671
3390.01	98.8357
3388.15	98.8686
3386.29	98.8823
3384.42	98.7967
3382.56	98.8219
3380.7	98.7351
3378.83	98.6214
3376.97	98.5322
3375.1	98.5051
3373.24	98.5811
3371.38	98.586
3369.51	98.6873
3367.65	98.8584
3365.79	98.9487
3363.92	98.9716
3362.06	98.8403
3360.2	98.7017
3358.33	98.6565
3356.47	98.599
3354.6	98.69
3352.74	98.8561
3350.88	98.799
3349.01	98.7009
3347.15	98.8958
3345.29	98.8816
3343.42	98.6534
3341.56	98.6532
3339.69	98.8909
3337.83	98.9991
3335.97	98.8527
3334.1	98.7292
3332.24	98.5742
3330.38	98.4474
3328.51	98.4845
3326.65	98.6757
3324.79	98.8947
3322.92	98.9003
3321.06	98.9141
3319.19	98.8774
3317.33	98.8551
3315.47	98.9521
3313.6	98.9503
3311.74	98.8442
3309.88	98.7352
3308.01	98.7204
3306.15	98.7819
3304.28	98.9088
3302.42	98.9685
3300.56	98.9311
3298.69	98.9235
3296.83	98.744
3294.97	98.7974
3293.1	99.0195
3291.24	98.797
3289.38	98.5482
3287.51	98.5965
3285.65	98.7001
3283.78	98.5983
3281.92	98.7148
3280.06	98.9807
3278.19	98.9328
3276.33	98.9756
3274.47	98.9615
3272.6	98.8914
3270.74	98.9023
3268.88	98.8396
3267.01	98.8642
3265.15	98.955
3263.28	98.959
3261.42	98.8796
3259.56	98.738
3257.69	98.6595
3255.83	98.8803
3253.97	99.0433
3252.1	99.0158
3250.24	99.0593
3248.37	99.0476
3246.51	98.9147
3244.65	98.9248
3242.78	98.8911
3240.92	98.7429
3239.06	98.7421
3237.19	98.729
3235.33	98.8304
3233.47	99.1284
3231.6	99.2033
3229.74	98.9459
3227.87	98.8487
3226.01	99.1794
3224.15	99.1105
3222.28	98.7485
3220.42	98.6798
3218.56	98.7228
3216.69	98.8306
3214.83	99.0216
3212.97	98.9449
3211.1	98.7127
3209.24	98.7298
3207.37	98.8146
3205.51	98.7086
3203.65	98.6361
3201.78	98.8076
3199.92	99.0452
3198.06	99.0834
3196.19	98.9082
3194.33	98.7535
3192.46	98.8873
3190.6	99.0548
3188.74	98.9213
3186.87	98.6787
3185.01	98.7639
3183.15	98.9078
3181.28	98.8123
3179.42	98.7542
3177.56	98.9007
3175.69	98.9266
3173.83	98.8523
3171.96	98.9212
3170.1	99.0153
3168.24	98.9356
3166.37	98.936
3164.51	99.0102
3162.65	98.9893
3160.78	99.0621
3158.92	99.1119
3157.06	99.0325
3155.19	98.8423
3153.33	98.7655
3151.46	98.8922
3149.6	98.8706
3147.74	98.59
3145.87	98.4775
3144.01	98.7501
3142.15	99.0302
3140.28	98.9923
3138.42	98.8182
3136.55	98.8893
3134.69	98.9546
3132.83	98.9211
3130.96	98.9549
3129.1	98.754
3127.24	98.5809
3125.37	98.6658
3123.51	98.7826
3121.65	98.7179
3119.78	98.6688
3117.92	98.6605
3116.05	98.6727
3114.19	98.8162
3112.33	98.6579
3110.46	98.5776
3108.6	98.8015
3106.74	98.7705
3104.87	98.5516
3103.01	98.4373
3101.15	98.2912
3099.28	98.2024
3097.42	98.3379
3095.55	98.1294
3093.69	97.8614
3091.83	97.6789
3089.96	97.3277
3088.1	96.8738
3086.24	96.6432
3084.37	96.5866
3082.51	96.5264
3080.64	96.522
3078.78	96.5505
3076.92	96.5505
3075.05	96.4637
3073.19	96.3971
3071.33	96.501
3069.46	96.6181
3067.6	96.6252
3065.74	96.8635
3063.87	97.1447
3062.01	97.139
3060.14	97.2533
3058.28	97.4493
3056.42	97.4583
3054.55	97.484
3052.69	97.371
3050.83	97.3236
3048.96	97.3043
3047.1	97.1893
3045.24	97.1154
3043.37	97.1216
3041.51	97.2604
3039.64	97.3725
3037.78	97.2947
3035.92	97.1795
3034.05	97.2426
3032.19	97.1579
3030.33	96.9364
3028.46	96.8445
3026.6	96.5719
3024.73	96.1114
3022.87	95.8526
3021.01	95.5311
3019.14	95.1154
3017.28	94.7594
3015.42	94.5138
3013.55	94.3807
3011.69	94.2646
3009.83	94.1258
3007.96	94.0442
3006.1	94.1059
3004.23	94.2922
3002.37	94.4803
3000.51	94.5177
2998.64	94.515
2996.78	94.5589
2994.92	94.4808
2993.05	94.2494
2991.19	93.9964
2989.32	93.784
2987.46	93.4337
2985.6	93.01
2983.73	92.5891
2981.87	92.0883
2980.01	91.4479
2978.14	90.7068
2976.28	89.8587
2974.42	88.7885
2972.55	87.3279
2970.69	85.4686
2968.82	83.5044
2966.96	81.7777
2965.1	80.329
2963.23	79.5106
2961.37	79.5363
2959.51	79.9887
2957.64	80.7286
2955.78	81.6404
2953.92	82.6687
2952.05	83.7061
2950.19	84.4736
2948.32	84.8658
2946.46	84.7612
2944.6	84.3014
2942.73	83.4216
2940.87	82.3245
2939.01	81.2342
2937.14	80.0874
2935.28	78.7383
2933.41	77.2565
2931.55	75.9147
2929.69	74.7396
2927.82	73.6958
2925.96	72.759
2924.1	72.0207
2922.23	71.585
2920.37	71.3206
2918.51	71.2701
2916.64	71.5519
2914.78	72.1172
2912.91	72.8372
2911.05	73.7253
2909.19	74.5673
2907.32	75.4172
2905.46	76.1419
2903.6	76.8189
2901.73	77.639
2899.87	78.3109
2898.01	78.7184
2896.14	79.1131
2894.28	79.3749
2892.41	79.4293
2890.55	79.4713
2888.69	79.6014
2886.82	79.8287
2884.96	80.1139
2883.1	80.2462
2881.23	80.3456
2879.37	80.3209
2877.5	80.1402
2875.64	79.9122
2873.78	79.8991
2871.91	80.1339
2870.05	80.7137
2868.19	81.4297
2866.32	81.9517
2864.46	82.2275
2862.6	82.2487
2860.73	81.785
2858.87	80.9622
2857	80.2091
2855.14	79.7969
2853.28	79.762
2851.41	80.0589
2849.55	80.6755
2847.69	81.6835
2845.82	82.6674
2843.96	83.2413
2842.1	83.5906
2840.23	83.6824
2838.37	83.6219
2836.5	83.6697
2834.64	83.7212
2832.78	84.0193
2830.91	84.7197
2829.05	85.7249
2827.19	86.9056
2825.32	87.9117
2823.46	88.5725
2821.59	89.1672
2819.73	89.588
2817.87	89.9075
2816	90.5319
2814.14	91.2888
2812.28	91.9264
2810.41	92.5813
2808.55	93.2517
2806.69	93.8978
2804.82	94.5144
2802.96	95.0137
2801.09	95.4383
2799.23	95.7769
2797.37	96.0822
2795.5	96.3523
2793.64	96.6026
2791.78	96.7888
2789.91	96.9425
2788.05	97.1262
2786.19	97.2279
2784.32	97.3211
2782.46	97.4686
2780.59	97.5636
2778.73	97.5798
2776.87	97.6926
2775	97.7336
2773.14	97.7436
2771.28	97.7567
2769.41	97.727
2767.55	97.7482
2765.68	97.7764
2763.82	97.7659
2761.96	97.794
2760.09	97.7951
2758.23	97.7807
2756.37	97.8179
2754.5	97.9072
2752.64	97.9869
2750.78	97.9954
2748.91	97.891
2747.05	97.8799
2745.18	97.9269
2743.32	97.8657
2741.46	97.8959
2739.59	97.9693
2737.73	98.001
2735.87	97.8427
2734	97.6585
2732.14	97.6537
2730.27	97.5489
2728.41	97.3968
2726.55	97.2841
2724.68	97.2817
2722.82	97.3862
2720.96	97.5178
2719.09	97.6742
2717.23	97.8149
2715.37	97.8666
2713.5	97.9045
2711.64	97.9459
2709.77	98.0853
2707.91	98.1959
2706.05	98.2341
2704.18	98.244
2702.32	98.1797
2700.46	98.1632
2698.59	98.2693
2696.73	98.351
2694.87	98.32
2693	98.2809
2691.14	98.3623
2689.27	98.5184
2687.41	98.4867
2685.55	98.4327
2683.68	98.5385
2681.82	98.5857
2679.96	98.4884
2678.09	98.4097
2676.23	98.3659
2674.36	98.3882
2672.5	98.4031
2670.64	98.3831
2668.77	98.4456
2666.91	98.4706
2665.05	98.4013
2663.18	98.3634
2661.32	98.3763
2659.46	98.4619
2657.59	98.5279
2655.73	98.4391
2653.86	98.4084
2652	98.4574
2650.14	98.5181
2648.27	98.5478
2646.41	98.6189
2644.55	98.7113
2642.68	98.6838
2640.82	98.6092
2638.96	98.5431
2637.09	98.542
2635.23	98.5859
2633.36	98.6503
2631.5	98.7587
2629.64	98.8029
2627.77	98.6704
2625.91	98.5415
2624.05	98.6351
2622.18	98.7462
2620.32	98.7608
2618.45	98.6481
2616.59	98.6891
2614.73	98.7452
2612.86	98.5745
2611	98.3731
2609.14	98.5384
2607.27	98.8073
2605.41	98.8143
2603.55	98.7649
2601.68	98.7058
2599.82	98.5957
2597.95	98.5758
2596.09	98.5653
2594.23	98.5425
2592.36	98.5241
2590.5	98.5874
2588.64	98.8225
2586.77	98.9114
2584.91	98.8284
2583.05	98.7375
2581.18	98.6456
2579.32	98.6789
2577.45	98.6735
2575.59	98.7136
2573.73	98.811
2571.86	98.808
2570	98.759
2568.14	98.7265
2566.27	98.6016
2564.41	98.5995
2562.54	98.6262
2560.68	98.6535
2558.82	98.7416
2556.95	98.7978
2555.09	98.7552
2553.23	98.8525
2551.36	98.929
2549.5	98.8909
2547.64	98.9495
2545.77	99.0553
2543.91	98.9121
2542.04	98.8472
2540.18	98.9412
2538.32	98.9275
2536.45	98.8346
2534.59	98.8923
2532.73	98.8834
2530.86	98.9281
2529	98.9227
2527.14	98.9266
2525.27	98.9608
2523.41	98.9494
2521.54	98.9761
2519.68	99.1119
2517.82	99.0811
2515.95	98.9519
2514.09	98.9851
2512.23	99.0947
2510.36	98.9911
2508.5	98.929
2506.63	99.0312
2504.77	99.0779
2502.91	99.1547
2501.04	99.2735
2499.18	99.2075
2497.32	98.9871
2495.45	98.9552
2493.59	99.034
2491.73	99.1195
2489.86	98.9933
2488	98.7877
2486.13	98.8987
2484.27	99.1718
2482.41	99.1344
2480.54	99.1088
2478.68	99.289
2476.82	99.1111
2474.95	98.9366
2473.09	99.0888
2471.22	99.1427
2469.36	99.0724
2467.5	99.1471
2465.63	99.2257
2463.77	99.1971
2461.91	99.0986
2460.04	98.9703
2458.18	98.9908
2456.32	99.1101
2454.45	99.1274
2452.59	99.0877
2450.72	99.0876
2448.86	99.1185
2447	99.1137
2445.13	98.9475
2443.27	98.9675
2441.41	99.1797
2439.54	99.2845
2437.68	99.1649
2435.82	99.1014
2433.95	99.1611
2432.09	99.0841
2430.22	99.0946
2428.36	99.2986
2426.5	99.3077
2424.63	99.262
2422.77	99.1758
2420.91	99.2332
2419.04	99.3726
2417.18	99.2004
2415.31	99.1533
2413.45	99.2693
2411.59	99.2617
2409.72	99.0593
2407.86	99.0076
2406	99.0897
2404.13	99.116
2402.27	99.1566
2400.41	99.2213
2398.54	99.2605
2396.68	99.2941
2394.81	99.3238
2392.95	99.2683
2391.09	99.1701
2389.22	99.186
2387.36	99.2014
2385.5	99.1371
2383.63	99.1646
2381.77	99.1845
2379.91	99.0362
2378.04	98.9327
2376.18	98.9208
2374.31	98.9041
2372.45	98.8865
2370.59	98.8297
2368.72	98.7458
2366.86	98.7637
2365	98.7661
2363.13	98.6617
2361.27	98.6808
2359.4	98.7308
2357.54	98.7617
2355.68	98.707
2353.81	98.7702
2351.95	99.0665
2350.09	99.1971
2348.22	99.026
2346.36	98.8407
2344.5	98.8788
2342.63	98.8995
2340.77	98.855
2338.9	98.8414
2337.04	98.8495
2335.18	98.8944
2333.31	99.0007
2331.45	99.0906
2329.59	98.9852
2327.72	98.9395
2325.86	98.9967
2324	99.0209
2322.13	99.0223
2320.27	99.0364
2318.4	99.0381
2316.54	99.0403
2314.68	99.0246
2312.81	99.0078
2310.95	99.0698
2309.09	99.1908
2307.22	99.2145
2305.36	99.121
2303.49	99.2735
2301.63	99.2554
2299.77	99.1392
2297.9	99.0728
2296.04	99.0471
2294.18	99.2542
2292.31	99.5428
2290.45	99.4935
2288.59	99.3743
2286.72	99.332
2284.86	99.2803
2282.99	99.151
2281.13	99.0347
2279.27	99.1125
2277.4	99.2098
2275.54	99.3422
2273.68	99.3566
2271.81	99.1915
2269.95	99.1121
2268.09	99.2208
2266.22	99.3497
2264.36	99.0615
2262.49	99.0723
2260.63	99.4031
2258.77	99.4271
2256.9	99.1842
2255.04	99.1213
2253.18	99.2646
2251.31	99.2868
2249.45	99.3292
2247.58	99.2601
2245.72	99.025
2243.86	99.1354
2241.99	99.3646
2240.13	99.3682
2238.27	99.6778
2236.4	99.8788
2234.54	99.4154
2232.68	99.1249
2230.81	99.1343
2228.95	99.3399
2227.08	99.725
2225.22	99.8826
2223.36	99.8623
2221.49	99.6795
2219.63	99.4479
2217.77	99.704
2215.9	99.7296
2214.04	99.4313
2212.18	99.4027
2210.31	99.6462
2208.45	99.9163
2206.58	99.8112
2204.72	99.5832
2202.86	99.3171
2200.99	98.9903
2199.13	98.9697
2197.27	99.2726
2195.4	99.5405
2193.54	99.4224
2191.67	99.3412
2189.81	99.2767
2187.95	98.7914
2186.08	99.0354
2184.22	99.315
2182.36	99.369
2180.49	99.6107
2178.63	100.097
2176.77	99.6171
2174.9	99.2157
2173.04	99.5101
2171.17	99.4523
2169.31	99.564
2167.45	99.6278
2165.58	99.4931
2163.72	99.4596
2161.86	99.4677
2159.99	99.4146
2158.13	99.6969
2156.26	100.244
2154.4	100.374
2152.54	99.9775
2150.67	100.18
2148.81	100.055
2146.95	99.8004
2145.08	99.7375
2143.22	99.8758
2141.36	99.7148
2139.49	99.597
2137.63	99.826
2135.76	99.6528
2133.9	99.5873
2132.04	99.5665
2130.17	99.5882
2128.31	99.5698
2126.45	99.5433
2124.58	99.7242
2122.72	99.8328
2120.86	99.5496
2118.99	99.5659
2117.13	99.545
2115.26	99.0788
2113.4	99.0951
2111.54	99.4274
2109.67	99.4026
2107.81	99.3519
2105.95	99.596
2104.08	99.5947
2102.22	99.4978
2100.35	99.2646
2098.49	99.3793
2096.63	99.8164
2094.76	99.7597
2092.9	99.6636
2091.04	99.7831
2089.17	99.8237
2087.31	99.6069
2085.45	99.7063
2083.58	99.6957
2081.72	99.4757
2079.85	99.5957
2077.99	99.7302
2076.13	99.5095
2074.26	99.351
2072.4	99.1584
2070.54	99.2048
2068.67	99.4148
2066.81	99.6288
2064.95	99.8529
2063.08	99.6444
2061.22	99.3918
2059.35	99.5884
2057.49	99.9036
2055.63	99.5922
2053.76	99.2098
2051.9	99.2899
2050.04	99.3259
2048.17	99.3743
2046.31	99.5309
2044.44	99.703
2042.58	99.4741
2040.72	99.3576
2038.85	99.4741
2036.99	99.3753
2035.13	99.2982
2033.26	99.4958
2031.4	99.7502
2029.54	99.4999
2027.67	99.3028
2025.81	99.485
2023.94	99.3687
2022.08	99.6112
2020.22	100.382
2018.35	100.306
2016.49	99.9716
2014.63	100.016
2012.76	99.9094
2010.9	99.248
2009.04	99.221
2007.17	99.6386
2005.31	99.8559
2003.44	99.8468
2001.58	99.6385
1999.72	99.5809
1997.85	99.5408
1995.99	100.105
1994.13	100.309
1992.26	99.4574
1990.4	99.3317
1988.53	99.5701
1986.67	99.5213
1984.81	99.491
1982.94	99.5549
1981.08	99.634
1979.22	99.7027
1977.35	99.6233
1975.49	99.5985
1973.63	100.239
1971.76	100.366
1969.9	99.5614
1968.03	99.138
1966.17	99.1036
1964.31	98.8792
1962.44	99.1291
1960.58	99.7539
1958.72	100.145
1956.85	99.8597
1954.99	99.6698
1953.13	99.5916
1951.26	99.9125
1949.4	100.303
1947.53	99.8485
1945.67	99.4964
1943.81	99.7775
1941.94	99.9253
1940.08	99.5299
1938.22	99.2006
1936.35	99.3144
1934.49	99.5026
1932.62	99.5637
1930.76	99.8762
1928.9	99.7478
1927.03	99.5232
1925.17	99.4122
1923.31	99.5068
1921.44	99.6759
1919.58	99.6361
1917.72	99.5141
1915.85	99.502
1913.99	99.6701
1912.12	99.6447
1910.26	99.6025
1908.4	99.9373
1906.53	99.726
1904.67	99.314
1902.81	99.3563
1900.94	99.5425
1899.08	99.6299
1897.21	99.6233
1895.35	99.6751
1893.49	99.6658
1891.62	99.4599
1889.76	99.5589
1887.9	99.7341
1886.03	99.6769
1884.17	99.5781
1882.31	99.4307
1880.44	99.4554
1878.58	99.6144
1876.71	99.6062
1874.85	99.4973
1872.99	99.2762
1871.12	99.2212
1869.26	99.3819
1867.4	99.5261
1865.53	99.5915
1863.67	99.4797
1861.81	99.4216
1859.94	99.393
1858.08	99.3263
1856.21	99.4178
1854.35	99.4864
1852.49	99.396
1850.62	99.3478
1848.76	99.3617
1846.9	99.3184
1845.03	99.3671
1843.17	99.4807
1841.3	99.4452
1839.44	99.4027
1837.58	99.4043
1835.71	99.3547
1833.85	99.2899
1831.99	99.3983
1830.12	99.5436
1828.26	99.4544
1826.4	99.3676
1824.53	99.4231
1822.67	99.4525
1820.8	99.4136
1818.94	99.3214
1817.08	99.3427
1815.21	99.3295
1813.35	99.2523
1811.49	99.3113
1809.62	99.3292
1807.76	99.2559
1805.9	99.204
1804.03	99.1157
1802.17	99.0055
1800.3	99.0091
1798.44	98.982
1796.58	98.9423
1794.71	98.8413
1792.85	98.7372
1790.99	98.7614
1789.12	98.6349
1787.26	98.527
1785.39	98.454
1783.53	98.3768
1781.67	98.3633
1779.8	98.4254
1777.94	98.4153
1776.08	98.3305
1774.21	98.3209
1772.35	98.3484
1770.49	98.436
1768.62	98.4909
1766.76	98.5694
1764.89	98.5565
1763.03	98.4115
1761.17	98.329
1759.3	98.2519
1757.44	98.1009
1755.58	97.8772
1753.71	97.572
1751.85	97.2972
1749.99	97.0225
1748.12	96.5375
1746.26	96.1918
1744.39	95.988
1742.53	95.7705
1740.67	95.6815
1738.8	95.6442
1736.94	95.5409
1735.08	95.2919
1733.21	95.5081
1731.35	95.7161
1729.48	95.744
1727.62	95.797
1725.76	95.8518
1723.89	95.9589
1722.03	96.0274
1720.17	95.8832
1718.3	95.7889
1716.44	96.043
1714.58	96.1982
1712.71	96.2038
1710.85	96.187
1708.98	96.2004
1707.12	96.2139
1705.26	96.3155
1703.39	96.3435
1701.53	96.0528
1699.67	95.7474
1697.8	95.3325
1695.94	94.8027
1694.08	94.5447
1692.21	94.2938
1690.35	94.2583
1688.48	94.5138
1686.62	94.6554
1684.76	94.9596
1682.89	95.7328
1681.03	96.0157
1679.17	96.0479
1677.3	96.0095
1675.44	96.1425
1673.57	96.451
1671.71	96.545
1669.85	96.6763
1667.98	96.7858
1666.12	96.6541
1664.26	96.3113
1662.39	95.9847
1660.53	95.5624
1658.67	94.8652
1656.8	93.7891
1654.94	92.5786
1653.07	91.0025
1651.21	89.4004
1649.35	87.6768
1647.48	85.1528
1645.62	82.7071
1643.76	81.8911
1641.89	82.467
1640.03	83.9457
1638.16	85.2775
1636.3	86.5304
1634.44	88.4545
1632.57	89.6227
1630.71	90.2208
1628.85	90.7416
1626.98	91.5019
1625.12	92.1352
1623.26	92.8898
1621.39	93.5901
1619.53	93.7576
1617.66	93.7011
1615.8	93.8291
1613.94	93.8657
1612.07	93.5649
1610.21	93.0609
1608.35	92.5217
1606.48	92.175
1604.62	92.0374
1602.76	92.1075
1600.89	92.328
1599.03	92.5495
1597.16	92.6541
1595.3	92.7266
1593.44	92.7277
1591.57	92.7114
1589.71	92.7562
1587.85	92.8514
1585.98	93.0138
1584.12	93.2627
1582.25	93.5839
1580.39	93.9297
1578.53	94.1628
1576.66	94.3828
1574.8	94.9434
1572.94	95.2485
1571.07	95.2352
1569.21	95.3635
1567.35	95.6408
1565.48	95.8182
1563.62	95.9582
1561.75	95.9544
1559.89	96.0646
1558.03	97.0283
1556.16	97.5853
1554.3	97.6146
1552.44	97.6405
1550.57	97.7215
1548.71	97.7844
1546.85	97.791
1544.98	97.7785
1543.12	97.7288
1541.25	97.7011
1539.39	97.98
1537.53	98.1069
1535.66	97.9594
1533.8	97.8051
1531.94	97.7507
1530.07	97.545
1528.21	97.253
1526.34	96.8054
1524.48	95.9464
1522.62	94.7427
1520.75	93.3802
1518.89	92.2788
1517.03	91.3186
1515.16	90.7502
1513.3	90.7525
1511.44	91.5048
1509.57	92.4354
1507.71	93.3937
1505.84	95.0793
1503.98	95.9662
1502.12	96.1415
1500.25	96.2425
1498.39	96.3469
1496.53	96.4063
1494.66	96.4605
1492.8	96.3449
1490.94	96.0537
1489.07	95.7783
1487.21	95.304
1485.34	94.5694
1483.48	93.7002
1481.62	92.8825
1479.75	92.4496
1477.89	92.26
1476.03	92.0728
1474.16	91.5783
1472.3	90.5162
1470.43	88.9475
1468.57	86.9888
1466.71	85.0762
1464.84	83.6198
1462.98	83.0306
1461.12	82.6058
1459.25	81.8395
1457.39	80.6585
1455.53	79.7153
1453.66	78.8515
1451.8	78.2006
1449.93	77.6874
1448.07	77.3713
1446.21	77.3245
1444.34	77.2491
1442.48	76.8953
1440.62	76.1663
1438.75	74.9564
1436.89	74.0598
1435.03	74.7531
1433.16	76.0081
1431.3	77.3611
1429.43	78.9522
1427.57	80.4454
1425.71	81.7743
1423.84	83.5796
1421.98	85.2728
1420.12	86.4546
1418.25	88.1597
1416.39	89.4191
1414.52	89.7206
1412.66	89.3079
1410.8	88.6848
1408.93	88.2779
1407.07	88.499
1405.21	89.5113
1403.34	90.86
1401.48	91.736
1399.62	92.3663
1397.75	92.8328
1395.89	93.0097
1394.02	93.104
1392.16	93.0367
1390.3	92.6606
1388.43	92.0315
1386.57	91.1344
1384.71	90.0247
1382.84	88.4852
1380.98	86.3466
1379.11	83.2671
1377.25	80.3703
1375.39	78.9745
1373.52	79.0825
1371.66	79.6619
1369.8	80.2196
1367.93	80.8352
1366.07	81.3528
1364.21	81.5725
1362.34	82.0972
1360.48	83.3322
1358.61	84.9374
1356.75	86.4595
1354.89	87.7541
1353.02	88.865
1351.16	89.9139
1349.3	90.8836
1347.43	91.7295
1345.57	92.3212
1343.71	92.6377
1341.84	92.7419
1339.98	92.6973
1338.11	92.4022
1336.25	91.8407
1334.39	91.3165
1332.52	91.1645
1330.66	91.3537
1328.8	91.7898
1326.93	92.3218
1325.07	92.8891
1323.2	93.4159
1321.34	93.8368
1319.48	94.0254
1317.61	93.9868
1315.75	93.791
1313.89	93.3543
1312.02	92.7423
1310.16	92.1904
1308.3	91.8846
1306.43	91.7959
1304.57	91.8315
1302.7	92.0441
1300.84	92.4027
1298.98	92.796
1297.11	93.0907
1295.25	93.1545
1293.39	92.9362
1291.52	92.5637
1289.66	92.1552
1287.8	91.9219
1285.93	91.8359
1284.07	91.7994
1282.2	91.5668
1280.34	90.9379
1278.48	90.0084
1276.61	89.0904
1274.75	88.4246
1272.89	88.0425
1271.02	87.8024
1269.16	87.6397
1267.29	87.4576
1265.43	87.1764
1263.57	86.6984
1261.7	86.285
1259.84	86.4431
1257.98	87.185
1256.11	88.1053
1254.25	88.9075
1252.39	89.339
1250.52	89.4344
1248.66	89.1893
1246.79	88.8372
1244.93	88.6645
1243.07	88.7385
1241.2	89.0529
1239.34	89.4649
1237.48	89.8562
1235.61	90.1652
1233.75	90.3383
1231.89	90.3594
1230.02	90.2231
1228.16	90.0395
1226.29	89.916
1224.43	89.973
1222.57	90.1196
1220.7	90.3681
1218.84	90.6836
1216.98	91.052
1215.11	91.4002
1213.25	91.6406
1211.38	91.8164
1209.52	91.9231
1207.66	91.9632
1205.79	92.0561
1203.93	92.1318
1202.07	92.0373
1200.2	91.7336
1198.34	91.4769
1196.48	91.4445
1194.61	91.53
1192.75	91.5858
1190.88	91.64
1189.02	91.6839
1187.16	91.5629
1185.29	91.2083
1183.43	90.6654
1181.57	90.1129
1179.7	89.7244
1177.84	89.5638
1175.98	89.5345
1174.11	89.5228
1172.25	89.8418
1170.38	90.5681
1168.52	91.2312
1166.66	91.5468
1164.79	91.4533
1162.93	90.9451
1161.07	90.214
1159.2	89.3019
1157.34	88.1975
1155.47	87.4789
1153.61	87.6847
1151.75	88.0373
1149.88	87.4463
1148.02	86.3604
1146.16	86.3371
1144.29	87.6733
1142.43	89.3611
1140.57	90.6637
1138.7	91.395
1136.84	91.7323
1134.97	91.927
1133.11	92.0462
1131.25	92.0163
1129.38	91.8767
1127.52	91.726
1125.66	91.5801
1123.79	91.2979
1121.93	90.8285
1120.07	90.1914
1118.2	89.3731
1116.34	88.35
1114.47	87.346
1112.61	86.5168
1110.75	86.0044
1108.88	86.0849
1107.02	86.7285
1105.16	87.7356
1103.29	88.7765
1101.43	89.6664
1099.56	90.4764
1097.7	91.1109
1095.84	91.4689
1093.97	91.489
1092.11	91.1481
1090.25	90.7346
1088.38	90.5967
1086.52	90.4579
1084.66	89.7213
1082.79	88.4248
1080.93	86.991
1079.06	85.8018
1077.2	85.2656
1075.34	85.5567
1073.47	86.7439
1071.61	88.5879
1069.75	90.3395
1067.88	91.5131
1066.02	92.2365
1064.15	92.6506
1062.29	92.8133
1060.43	92.8092
1058.56	92.6119
1056.7	92.1843
1054.84	91.3653
1052.97	90.2315
1051.11	89.3173
1049.25	88.9616
1047.38	88.8588
1045.52	88.6169
1043.65	88.0922
1041.79	87.4765
1039.93	87.0252
1038.06	86.8057
1036.2	86.5947
1034.34	86.2711
1032.47	86.0863
1030.61	86.157
1028.75	86.3995
1026.88	86.6547
1025.02	86.6561
1023.15	86.2988
1021.29	85.5002
1019.43	84.3125
1017.56	83.3769
1015.7	83.313
1013.84	84.1129
1011.97	85.5036
1010.11	87.1209
1008.24	88.6953
1006.38	90.1167
1004.52	91.175
1002.65	91.8795
1000.79	92.3796
998.927	92.7178
997.063	92.8541
995.199	92.8977
993.336	92.883
991.472	92.7656
989.608	92.5989
987.745	92.4474
985.881	92.4122
984.017	92.5352
982.154	92.6037
980.29	92.6392
978.426	92.7415
976.563	92.8036
974.699	92.841
972.835	92.8312
970.972	92.7673
969.108	92.694
967.244	92.6842
965.38	92.5848
963.517	92.1614
961.653	91.3598
959.789	90.3011
957.926	89.3301
956.062	89.0631
954.198	89.2524
952.335	88.9
950.471	87.7594
948.607	86.6527
946.744	86.6516
944.88	87.8394
943.016	89.4589
941.153	90.9271
939.289	92.2401
937.425	93.3888
935.562	94.1396
933.698	94.4262
931.834	94.4304
929.971	94.3344
928.107	94.1197
926.243	93.7466
924.38	93.2444
922.516	92.4309
920.652	91.2591
918.789	89.6598
916.925	87.1004
915.061	84.1884
913.198	83.7864
911.334	86.3759
909.47	89.1593
907.607	90.6787
905.743	91.0468
903.879	90.7584
902.016	90.0189
900.152	88.6995
898.288	86.6729
896.425	83.6629
894.561	79.5218
892.697	74.3788
890.834	68.5359
888.97	62.7044
887.106	58.6316
885.243	58.2129
883.379	62.0252
881.515	68.5015
879.652	75.0332
877.788	80.2877
875.924	84.2396
874.061	87.0445
872.197	88.9849
870.333	90.3877
868.47	91.3523
866.606	91.9801
864.742	92.4375
862.879	92.841
861.015	93.1613
859.151	93.3914
857.288	93.5192
855.424	93.4884
853.56	93.2917
851.697	93.1918
849.833	93.1687
847.969	93.0733
846.106	92.9273
844.242	92.8856
842.378	92.6946
840.515	92.3818
838.651	91.7714
836.787	91.0108
834.924	90.762
833.06	91.0317
831.196	91.4081
829.333	91.6604
827.469	92.2925
825.605	93.0813
823.742	93.5152
821.878	93.5661
820.014	93.3993
818.151	93.2145
816.287	92.7888
814.423	92.2624
812.56	91.7889
810.696	91.0788
808.832	90.0151
806.969	88.5967
805.105	86.7992
803.241	84.4611
801.378	81.7473
799.514	79.214
797.65	77.6882
795.787	78.6646
793.923	82.0665
792.059	85.1261
790.196	85.7532
788.332	85.2295
786.468	85.6186
784.605	85.8873
782.741	85.2634
780.877	85.5269
779.014	87.7153
777.15	90.3225
775.286	92.1228
773.423	93.2176
771.559	93.8955
769.695	94.2234
767.832	94.3925
765.968	94.4477
764.104	94.1062
762.241	93.41
760.377	92.8317
758.513	92.6408
756.65	92.7244
754.786	93.1193
752.922	93.3524
751.059	93.1758
749.195	93.1021
747.331	93.5675
745.468	94.4536
743.604	95.2051
741.74	95.4405
739.877	95.4974
738.013	95.5719
736.149	95.602
734.286	95.5949
732.422	95.3793
730.558	95.1513
728.695	95.0152
726.831	94.9135
724.967	94.8907
723.104	94.84
721.24	94.6533
719.376	94.5227
717.513	94.8255
715.649	95.2282
713.785	95.3997
711.922	95.6328
710.058	95.9379
708.194	96.0993
706.331	96.0702
704.467	95.7396
702.603	95.5031
700.74	95.7196
698.876	96.0405
697.012	96.1761
695.149	96.3253
693.285	96.4404
691.421	96.3055
689.557	96.0736
687.694	95.9336
685.83	95.9903
683.966	95.9864
682.103	95.9393
680.239	96.018
678.375	96.2888
676.512	96.6006
674.648	96.7515
672.784	96.8174
670.921	96.5664
669.057	96.1636
667.193	96.2815
665.33	96.5768
663.466	96.5547
661.602	96.5187
659.739	96.3197
657.875	96.292
656.011	96.55
654.148	96.6978
652.284	96.51
650.42	96.334
648.557	96.3842
646.693	96.3822
644.829	96.0963
642.966	95.7007
641.102	95.1913
639.238	95.1914
637.375	95.742
635.511	96.0952
633.647	96.231
631.784	96.2552
629.92	96.3218
628.056	96.4339
626.193	96.4495
624.329	96.462
622.465	96.2342
620.602	96.103
618.738	96.2853
616.874	96.2514
615.011	96.2911
613.147	96.5651
611.283	96.5314
609.42	96.4847
607.556	96.4159
605.692	96.0945
603.829	96.0404
601.965	96.075
600.101	96.04
598.238	96.2502
596.374	96.0887
594.51	95.8085
592.647	95.8155
590.783	95.7776
588.919	95.5379
587.056	95.5041
585.192	95.3036
583.328	95.0807
581.465	94.9933
579.601	94.8197
577.737	94.5883
575.874	94.4152
574.01	94.1142
572.146	94.1824
570.283	94.534
568.419	94.7516
566.555	94.8886
564.692	95.2574
562.828	95.1981
560.964	95.0227
559.101	95.0222
557.237	95.009
555.373	94.3136
553.51	93.3477
551.646	92.538
549.782	91.9197
547.919	91.1384
546.055	89.7156
544.191	88.0046
542.328	87.1715
540.464	87.4603
538.6	88.3333
536.737	89.3808
534.873	90.3074
533.009	90.6466
531.146	90.4282
529.282	90.1385
527.418	90.1624
525.555	90.1254
523.691	90.4593
521.827	90.5638
519.964	90.4774
518.1	91.0172
516.236	91.8381
514.373	92.5556
512.509	92.9319
510.645	93.103
508.782	93.1182
506.918	92.9516
505.054	92.976
503.191	93.1353
501.327	93.3153
499.463	92.9636
497.6	92.2705
495.736	92.0528
493.872	92.3776
492.009	92.352
490.145	91.8351
488.281	91.9241
486.418	92.3132
484.554	92.3122
482.69	92.4663
480.827	93.0105
478.963	93.6562
477.099	93.5369
475.236	93.4742
473.372	93.27
471.508	93.4426
469.645	92.7271
467.781	91.9836
465.917	93.2275
464.054	94.5241
462.19	94.7564
460.326	94.8075
458.463	94.5926
456.599	94.5285
454.735	94.2471
452.872	94.6621
451.008	95.0768
449.144	94.0898
447.281	94.1316
445.417	94.1085
443.553	94.0797
441.69	93.8808
439.826	92.785
437.962	91.4899
436.099	89.597
434.235	86.5933
432.371	84.6284
430.508	83.284
428.644	81.7691
426.78	83.418
424.917	87.126
423.053	90.6749
421.189	92.7976
419.326	91.2141
417.462	92.0708
415.598	94.1729
413.734	93.6187
411.871	93.332
410.007	93.217
408.143	91.0971
406.28	90.8821
404.416	94.308
402.552	94.8114
400.689	93.044

## Sheet: juntos
Eter de petroleo			n-Hexano
wavenumber	%Transmittance		wavenumber	%Transmittance
3999.43	99.9126		3999.43	99.3965
3997.57	99.8757		3997.57	99.3976
3995.71	100.008		3995.71	99.4619
3993.84	100.137		3993.84	99.5074
3991.98	100.126		3991.98	99.354
3990.12	100.194		3990.12	99.2571
3988.25	100.135		3988.25	99.3055
3986.39	100.035		3986.39	99.279
3984.52	100.089		3984.52	99.1521
3982.66	100.001		3982.66	99.303
3980.8	99.8719		3980.8	99.536
3978.93	99.8816		3978.93	99.6541
3977.07	99.9104		3977.07	99.6442
3975.21	99.9832		3975.21	99.4224
3973.34	100.033		3973.34	99.4325
3971.48	100.19		3971.48	99.5806
3969.61	100.195		3969.61	99.41
3967.75	100.04		3967.75	99.2377
3965.89	100.116		3965.89	99.193
3964.02	100.021		3964.02	99.2166
3962.16	100.046		3962.16	99.291
3960.3	100.069		3960.3	99.249
3958.43	100.009		3958.43	99.1332
3956.57	100.181		3956.57	99.178
3954.71	100.155		3954.71	99.3451
3952.84	100.007		3952.84	99.3689
3950.98	100.087		3950.98	99.4011
3949.11	100.195		3949.11	99.4631
3947.25	100.137		3947.25	99.3331
3945.39	100.135		3945.39	99.2997
3943.52	100.193		3943.52	99.4537
3941.66	100.097		3941.66	99.502
3939.8	99.9865		3939.8	99.4243
3937.93	100.08		3937.93	99.2272
3936.07	100.143		3936.07	99.1518
3934.21	100.129		3934.21	99.2513
3932.34	100.213		3932.34	99.3854
3930.48	100.271		3930.48	99.4905
3928.61	100.446		3928.61	99.4524
3926.75	100.455		3926.75	99.4207
3924.89	100.139		3924.89	99.4433
3923.02	100.013		3923.02	99.3085
3921.16	100.174		3921.16	99.2194
3919.3	100.227		3919.3	99.3671
3917.43	100.178		3917.43	99.4462
3915.57	100.119		3915.57	99.2725
3913.7	100.092		3913.7	99.2511
3911.84	99.9741		3911.84	99.3923
3909.98	99.9888		3909.98	99.3564
3908.11	100.326		3908.11	99.2201
3906.25	100.287		3906.25	99.2865
3904.39	99.9183		3904.39	99.4659
3902.52	100.114		3902.52	99.5838
3900.66	100.47		3900.66	99.4683
3898.8	100.31		3898.8	99.3388
3896.93	100.018		3896.93	99.4273
3895.07	99.9904		3895.07	99.386
3893.2	99.9962		3893.2	99.3075
3891.34	100.029		3891.34	99.32
3889.48	100.273		3889.48	99.132
3887.61	100.397		3887.61	99.0722
3885.75	100.328		3885.75	99.217
3883.89	100.312		3883.89	99.2848
3882.02	100.078		3882.02	99.3056
3880.16	100.05		3880.16	99.4136
3878.3	100.029		3878.3	99.4195
3876.43	99.8184		3876.43	99.2089
3874.57	99.9586		3874.57	99.2297
3872.7	100.341		3872.7	99.3304
3870.84	100.407		3870.84	99.3576
3868.98	100.257		3868.98	99.3237
3867.11	100.363		3867.11	99.3378
3865.25	100.41		3865.25	99.2853
3863.39	100.158		3863.39	99.3356
3861.52	100.204		3861.52	99.6074
3859.66	100.43		3859.66	99.5875
3857.79	100.372		3857.79	99.4359
3855.93	100.573		3855.93	99.3805
3854.07	100.797		3854.07	99.4614
3852.2	100.307		3852.2	99.4475
3850.34	99.9554		3850.34	99.4626
3848.48	99.9943		3848.48	99.5362
3846.61	100.067		3846.61	99.5137
3844.75	100.129		3844.75	99.378
3842.89	100.253		3842.89	99.2972
3841.02	100.385		3841.02	99.3778
3839.16	100.131		3839.16	99.5308
3837.29	99.8338		3837.29	99.5538
3835.43	99.8079		3835.43	99.5636
3833.57	100.046		3833.57	99.5536
3831.7	100.358		3831.7	99.6719
3829.84	100.337		3829.84	99.6696
3827.98	100.109		3827.98	99.6664
3826.11	100.098		3826.11	99.6735
3824.25	100.233		3824.25	99.4928
3822.38	100.208		3822.38	99.3533
3820.52	100.189		3820.52	99.3693
3818.66	100.302		3818.66	99.3672
3816.79	100.172		3816.79	99.5642
3814.93	100.039		3814.93	99.5565
3813.07	100.072		3813.07	99.3909
3811.2	100.158		3811.2	99.3541
3809.34	100.353		3809.34	99.4217
3807.48	100.356		3807.48	99.6004
3805.61	100.263		3805.61	99.4167
3803.75	100.314		3803.75	99.2109
3801.88	100.32		3801.88	99.6615
3800.02	100.38		3800.02	99.7161
3798.16	100.453		3798.16	99.458
3796.29	100.476		3796.29	99.4236
3794.43	100.275		3794.43	99.4355
3792.57	99.9228		3792.57	99.3875
3790.7	99.8703		3790.7	99.3856
3788.84	99.9469		3788.84	99.4191
3786.98	99.9757		3786.98	99.492
3785.11	99.8548		3785.11	99.6153
3783.25	100.067		3783.25	99.5419
3781.38	100.326		3781.38	99.3929
3779.52	100.142		3779.52	99.4692
3777.66	99.9837		3777.66	99.5196
3775.79	100.104		3775.79	99.4559
3773.93	100.25		3773.93	99.363
3772.07	100.406		3772.07	99.2772
3770.2	100.515		3770.2	99.2557
3768.34	100.315		3768.34	99.313
3766.47	100.163		3766.47	99.4589
3764.61	100.143		3764.61	99.4631
3762.75	100.024		3762.75	99.5059
3760.88	99.953		3760.88	99.7651
3759.02	100.197		3759.02	99.7011
3757.16	100.459		3757.16	99.4939
3755.29	100.376		3755.29	99.3629
3753.43	100.14		3753.43	99.3961
3751.57	100.215		3751.57	99.7259
3749.7	100.475		3749.7	99.7945
3747.84	100.623		3747.84	99.4658
3745.97	100.565		3745.97	99.5765
3744.11	100.084		3744.11	99.6871
3742.25	99.9938		3742.25	99.7282
3740.38	100.337		3740.38	99.6896
3738.52	100.598		3738.52	99.3827
3736.66	100.902		3736.66	99.6018
3734.79	100.944		3734.79	99.8306
3732.93	100.211		3732.93	99.7452
3731.07	99.9243		3731.07	99.6165
3729.2	100.165		3729.2	99.4687
3727.34	100.196		3727.34	99.4612
3725.47	100.273		3725.47	99.4646
3723.61	100.424		3723.61	99.3234
3721.75	100.482		3721.75	99.2609
3719.88	100.478		3719.88	99.5781
3718.02	100.262		3718.02	99.6921
3716.16	99.9477		3716.16	99.4026
3714.29	100.196		3714.29	99.3537
3712.43	100.608		3712.43	99.563
3710.56	100.543		3710.56	99.5734
3708.7	100.507		3708.7	99.488
3706.84	100.401		3706.84	99.5973
3704.97	100.372		3704.97	99.7349
3703.11	100.177		3703.11	99.7436
3701.25	99.8243		3701.25	99.6161
3699.38	99.9882		3699.38	99.4631
3697.52	100.28		3697.52	99.4296
3695.66	100.289		3695.66	99.4638
3693.79	100.413		3693.79	99.5644
3691.93	100.616		3691.93	99.5586
3690.06	100.582		3690.06	99.6575
3688.2	100.579		3688.2	99.6779
3686.34	100.584		3686.34	99.5856
3684.47	100.279		3684.47	99.5735
3682.61	100.041		3682.61	99.5245
3680.75	100.087		3680.75	99.6525
3678.88	100.464		3678.88	99.6074
3677.02	100.554		3677.02	99.502
3675.16	100.438		3675.16	99.7081
3673.29	100.68		3673.29	99.6023
3671.43	100.575		3671.43	99.3338
3669.56	100.04		3669.56	99.2775
3667.7	99.9671		3667.7	99.2593
3665.84	100.155		3665.84	99.2756
3663.97	100.148		3663.97	99.3671
3662.11	100.179		3662.11	99.402
3660.25	100.367		3660.25	99.51
3658.38	100.273		3658.38	99.6022
3656.52	100.216		3656.52	99.6178
3654.65	100.437		3654.65	99.3596
3652.79	100.556		3652.79	99.2223
3650.93	100.294		3650.93	99.3452
3649.06	100.045		3649.06	99.4013
3647.2	100.267		3647.2	99.5949
3645.34	100.183		3645.34	99.736
3643.47	99.8119		3643.47	99.7295
3641.61	99.939		3641.61	99.6017
3639.75	100.2		3639.75	99.4142
3637.88	100.163		3637.88	99.2206
3636.02	100.194		3636.02	99.2246
3634.15	100.292		3634.15	99.3887
3632.29	100.499		3632.29	99.3092
3630.43	100.559		3630.43	99.2794
3628.56	100.154		3628.56	99.4939
3626.7	99.9962		3626.7	99.6127
3624.84	100.125		3624.84	99.4791
3622.97	100.359		3622.97	99.2842
3621.11	100.283		3621.11	99.1269
3619.25	99.8928		3619.25	99.1851
3617.38	100.037		3617.38	99.4155
3615.52	100.312		3615.52	99.3802
3613.65	100.186		3613.65	99.2547
3611.79	100.137		3611.79	99.2963
3609.93	100.07		3609.93	99.3646
3608.06	100.028		3608.06	99.228
3606.2	100.135		3606.2	99.2325
3604.34	100.136		3604.34	99.542
3602.47	99.9558		3602.47	99.6076
3600.61	99.9362		3600.61	99.4407
3598.74	100.144		3598.74	99.3579
3596.88	100.33		3596.88	99.1818
3595.02	100.229		3595.02	99.011
3593.15	99.9099		3593.15	99.0347
3591.29	99.964		3591.29	99.0479
3589.43	100.208		3589.43	99.1519
3587.56	100.133		3587.56	99.264
3585.7	100		3585.7	99.4428
3583.84	99.8628		3583.84	99.5709
3581.97	99.7664		3581.97	99.3051
3580.11	99.7694		3580.11	99.0601
3578.24	99.8802		3578.24	99.2194
3576.38	100.041		3576.38	99.4239
3574.52	99.8164		3574.52	99.3833
3572.65	99.7366		3572.65	99.0155
3570.79	100.006		3570.79	98.5806
3568.93	100.142		3568.93	98.7154
3567.06	99.9261		3567.06	98.999
3565.2	99.8074		3565.2	98.9123
3563.33	99.9542		3563.33	98.9949
3561.47	100.148		3561.47	99.0632
3559.61	100.094		3559.61	98.8679
3557.74	99.8926		3557.74	98.6495
3555.88	99.6766		3555.88	98.7694
3554.02	99.6659		3554.02	98.9189
3552.15	99.8954		3552.15	99.0301
3550.29	99.8914		3550.29	99.2761
3548.43	99.7921		3548.43	99.0868
3546.56	99.8019		3546.56	98.6844
3544.7	99.9546		3544.7	98.6703
3542.83	100.137		3542.83	98.8624
3540.97	99.8426		3540.97	99.0822
3539.11	99.7143		3539.11	99.021
3537.24	99.742		3537.24	98.7625
3535.38	99.7061		3535.38	98.6958
3533.52	99.863		3533.52	98.8947
3531.65	99.9287		3531.65	99.0553
3529.79	99.8092		3529.79	99.0047
3527.93	100.09		3527.93	98.9164
3526.06	100.602		3526.06	98.8787
3524.2	100.209		3524.2	98.942
3522.33	99.6252		3522.33	98.9883
3520.47	99.6654		3520.47	99.0903
3518.61	99.8192		3518.61	99.0212
3516.74	99.8899		3516.74	98.824
3514.88	99.8683		3514.88	98.7208
3513.02	99.8466		3513.02	98.6335
3511.15	99.8976		3511.15	98.8937
3509.29	99.8581		3509.29	99.2803
3507.42	99.9931		3507.42	99.1621
3505.56	100.187		3505.56	98.8893
3503.7	100.161		3503.7	98.8814
3501.83	99.8355		3501.83	98.7945
3499.97	99.6077		3499.97	98.7824
3498.11	99.613		3498.11	98.753
3496.24	99.7224		3496.24	98.609
3494.38	99.8047		3494.38	98.6405
3492.52	99.6762		3492.52	98.8704
3490.65	99.7558		3490.65	98.8317
3488.79	99.9425		3488.79	98.6917
3486.92	99.9825		3486.92	98.67
3485.06	99.8374		3485.06	98.6678
3483.2	99.8107		3483.2	98.824
3481.33	100.074		3481.33	98.8086
3479.47	99.9676		3479.47	98.5591
3477.61	99.7084		3477.61	98.7686
3475.74	99.544		3475.74	99.2561
3473.88	99.8321		3473.88	99.3086
3472.02	100.26		3472.02	98.9026
3470.15	99.9173		3470.15	98.636
3468.29	99.653		3468.29	98.726
3466.42	99.8437		3466.42	98.7214
3464.56	99.6459		3464.56	98.486
3462.7	99.4912		3462.7	98.5021
3460.83	99.6507		3460.83	98.589
3458.97	99.6957		3458.97	98.7053
3457.11	99.6464		3457.11	98.8147
3455.24	99.6749		3455.24	98.7538
3453.38	99.7788		3453.38	98.5521
3451.51	99.7277		3451.51	98.4936
3449.65	99.6171		3449.65	98.5851
3447.79	99.7494		3447.79	98.6373
3445.92	99.7956		3445.92	98.7992
3444.06	99.5279		3444.06	99.2113
3442.2	99.4631		3442.2	99.1584
3440.33	99.4783		3440.33	98.831
3438.47	99.385		3438.47	98.7473
3436.61	99.4494		3436.61	98.6891
3434.74	99.6212		3434.74	98.6121
3432.88	99.7548		3432.88	98.5935
3431.01	99.7658		3431.01	98.8664
3429.15	99.6804		3429.15	99.1252
3427.29	99.6876		3427.29	98.9274
3425.42	99.7649		3425.42	98.6302
3423.56	99.7229		3423.56	98.7626
3421.7	99.4826		3421.7	98.8914
3419.83	99.3506		3419.83	98.7295
3417.97	99.5505		3417.97	98.5206
3416.11	99.7553		3416.11	98.4878
3414.24	99.6694		3414.24	98.6724
3412.38	99.5758		3412.38	98.6954
3410.51	99.6108		3410.51	98.5573
3408.65	99.7878		3408.65	98.6428
3406.79	99.9941		3406.79	98.839
3404.92	99.963		3404.92	98.7976
3403.06	99.5789		3403.06	98.8339
3401.2	99.3229		3401.2	98.8483
3399.33	99.3405		3399.33	98.6462
3397.47	99.3818		3397.47	98.7716
3395.6	99.3968		3395.6	99.1243
3393.74	99.3614		3393.74	99.1289
3391.88	99.585		3391.88	98.9671
3390.01	99.8978		3390.01	98.8357
3388.15	99.7961		3388.15	98.8686
3386.29	99.5348		3386.29	98.8823
3384.42	99.4531		3384.42	98.7967
3382.56	99.5729		3382.56	98.8219
3380.7	99.6159		3380.7	98.7351
3378.83	99.2872		3378.83	98.6214
3376.97	99.2984		3376.97	98.5322
3375.1	99.5951		3375.1	98.5051
3373.24	99.5956		3373.24	98.5811
3371.38	99.6857		3371.38	98.586
3369.51	99.6938		3369.51	98.6873
3367.65	99.6999		3367.65	98.8584
3365.79	99.7198		3365.79	98.9487
3363.92	99.6372		3363.92	98.9716
3362.06	99.7019		3362.06	98.8403
3360.2	99.8149		3360.2	98.7017
3358.33	99.7479		3358.33	98.6565
3356.47	99.4653		3356.47	98.599
3354.6	99.2742		3354.6	98.69
3352.74	99.4223		3352.74	98.8561
3350.88	99.8748		3350.88	98.799
3349.01	100.098		3349.01	98.7009
3347.15	99.7317		3347.15	98.8958
3345.29	99.5785		3345.29	98.8816
3343.42	99.617		3343.42	98.6534
3341.56	99.4779		3341.56	98.6532
3339.69	99.5018		3339.69	98.8909
3337.83	99.5975		3337.83	98.9991
3335.97	99.5129		3335.97	98.8527
3334.1	99.4702		3334.1	98.7292
3332.24	99.7002		3332.24	98.5742
3330.38	99.6399		3330.38	98.4474
3328.51	99.4953		3328.51	98.4845
3326.65	99.6166		3326.65	98.6757
3324.79	99.7763		3324.79	98.8947
3322.92	99.9259		3322.92	98.9003
3321.06	99.8994		3321.06	98.9141
3319.19	99.6395		3319.19	98.8774
3317.33	99.5668		3317.33	98.8551
3315.47	99.5816		3315.47	98.9521
3313.6	99.5224		3313.6	98.9503
3311.74	99.5367		3311.74	98.8442
3309.88	99.5622		3309.88	98.7352
3308.01	99.4592		3308.01	98.7204
3306.15	99.392		3306.15	98.7819
3304.28	99.4276		3304.28	98.9088
3302.42	99.5118		3302.42	98.9685
3300.56	99.6456		3300.56	98.9311
3298.69	99.6244		3298.69	98.9235
3296.83	99.5689		3296.83	98.744
3294.97	99.6504		3294.97	98.7974
3293.1	99.6867		3293.1	99.0195
3291.24	99.4487		3291.24	98.797
3289.38	99.3427		3289.38	98.5482
3287.51	99.4932		3287.51	98.5965
3285.65	99.5248		3285.65	98.7001
3283.78	99.5618		3283.78	98.5983
3281.92	99.8107		3281.92	98.7148
3280.06	99.7876		3280.06	98.9807
3278.19	99.3928		3278.19	98.9328
3276.33	99.2782		3276.33	98.9756
3274.47	99.559		3274.47	98.9615
3272.6	99.6332		3272.6	98.8914
3270.74	99.5338		3270.74	98.9023
3268.88	99.693		3268.88	98.8396
3267.01	99.7867		3267.01	98.8642
3265.15	99.5912		3265.15	98.955
3263.28	99.5721		3263.28	98.959
3261.42	99.749		3261.42	98.8796
3259.56	99.7074		3259.56	98.738
3257.69	99.6509		3257.69	98.6595
3255.83	99.7602		3255.83	98.8803
3253.97	99.7317		3253.97	99.0433
3252.1	99.5978		3252.1	99.0158
3250.24	99.4007		3250.24	99.0593
3248.37	99.2143		3248.37	99.0476
3246.51	99.3196		3246.51	98.9147
3244.65	99.5882		3244.65	98.9248
3242.78	99.8644		3242.78	98.8911
3240.92	99.9877		3240.92	98.7429
3239.06	99.6763		3239.06	98.7421
3237.19	99.3397		3237.19	98.729
3235.33	99.3519		3235.33	98.8304
3233.47	99.4743		3233.47	99.1284
3231.6	99.5464		3231.6	99.2033
3229.74	99.5609		3229.74	98.9459
3227.87	99.6163		3227.87	98.8487
3226.01	99.6965		3226.01	99.1794
3224.15	99.6787		3224.15	99.1105
3222.28	99.6001		3222.28	98.7485
3220.42	99.6098		3220.42	98.6798
3218.56	99.6413		3218.56	98.7228
3216.69	99.6522		3216.69	98.8306
3214.83	99.7107		3214.83	99.0216
3212.97	99.6674		3212.97	98.9449
3211.1	99.6259		3211.1	98.7127
3209.24	99.7079		3209.24	98.7298
3207.37	99.6727		3207.37	98.8146
3205.51	99.6271		3205.51	98.7086
3203.65	99.6798		3203.65	98.6361
3201.78	99.6305		3201.78	98.8076
3199.92	99.4123		3199.92	99.0452
3198.06	99.2557		3198.06	99.0834
3196.19	99.3703		3196.19	98.9082
3194.33	99.5013		3194.33	98.7535
3192.46	99.5207		3192.46	98.8873
3190.6	99.5642		3190.6	99.0548
3188.74	99.6503		3188.74	98.9213
3186.87	99.6457		3186.87	98.6787
3185.01	99.6793		3185.01	98.7639
3183.15	99.7436		3183.15	98.9078
3181.28	99.6209		3181.28	98.8123
3179.42	99.5214		3179.42	98.7542
3177.56	99.6188		3177.56	98.9007
3175.69	99.6045		3175.69	98.9266
3173.83	99.4784		3173.83	98.8523
3171.96	99.4058		3171.96	98.9212
3170.1	99.3814		3170.1	99.0153
3168.24	99.4055		3168.24	98.9356
3166.37	99.4895		3166.37	98.936
3164.51	99.5615		3164.51	99.0102
3162.65	99.4925		3162.65	98.9893
3160.78	99.3244		3160.78	99.0621
3158.92	99.2018		3158.92	99.1119
3157.06	99.3009		3157.06	99.0325
3155.19	99.6064		3155.19	98.8423
3153.33	99.6907		3153.33	98.7655
3151.46	99.5166		3151.46	98.8922
3149.6	99.5438		3149.6	98.8706
3147.74	99.5552		3147.74	98.59
3145.87	99.4363		3145.87	98.4775
3144.01	99.5257		3144.01	98.7501
3142.15	99.5033		3142.15	99.0302
3140.28	99.2897		3140.28	98.9923
3138.42	99.3278		3138.42	98.8182
3136.55	99.4568		3136.55	98.8893
3134.69	99.4744		3134.69	98.9546
3132.83	99.427		3132.83	98.9211
3130.96	99.2352		3130.96	98.9549
3129.1	99.1542		3129.1	98.754
3127.24	99.286		3127.24	98.5809
3125.37	99.2823		3125.37	98.6658
3123.51	99.2433		3123.51	98.7826
3121.65	99.3674		3121.65	98.7179
3119.78	99.4145		3119.78	98.6688
3117.92	99.355		3117.92	98.6605
3116.05	99.1978		3116.05	98.6727
3114.19	99.012		3114.19	98.8162
3112.33	98.9703		3112.33	98.6579
3110.46	98.9598		3110.46	98.5776
3108.6	99.104		3108.6	98.8015
3106.74	99.2545		3106.74	98.7705
3104.87	99.1517		3104.87	98.5516
3103.01	99.0621		3103.01	98.4373
3101.15	99.0831		3101.15	98.2912
3099.28	99.1794		3099.28	98.2024
3097.42	99.1849		3097.42	98.3379
3095.55	98.8669		3095.55	98.1294
3093.69	98.4523		3093.69	97.8614
3091.83	98.169		3091.83	97.6789
3089.96	97.751		3089.96	97.3277
3088.1	97.1714		3088.1	96.8738
3086.24	96.9176		3086.24	96.6432
3084.37	96.7775		3084.37	96.5866
3082.51	96.5821		3082.51	96.5264
3080.64	96.6788		3080.64	96.522
3078.78	96.8424		3078.78	96.5505
3076.92	96.7944		3076.92	96.5505
3075.05	96.7569		3075.05	96.4637
3073.19	96.8747		3073.19	96.3971
3071.33	96.9429		3071.33	96.501
3069.46	97.0167		3069.46	96.6181
3067.6	97.2712		3067.6	96.6252
3065.74	97.4583		3065.74	96.8635
3063.87	97.6018		3063.87	97.1447
3062.01	97.867		3062.01	97.139
3060.14	97.8695		3060.14	97.2533
3058.28	97.7313		3058.28	97.4493
3056.42	97.8799		3056.42	97.4583
3054.55	98.0419		3054.55	97.484
3052.69	97.9551		3052.69	97.371
3050.83	97.8691		3050.83	97.3236
3048.96	97.837		3048.96	97.3043
3047.1	97.7673		3047.1	97.1893
3045.24	97.7603		3045.24	97.1154
3043.37	97.812		3043.37	97.1216
3041.51	97.8578		3041.51	97.2604
3039.64	97.7526		3039.64	97.3725
3037.78	97.6674		3037.78	97.2947
3035.92	97.7064		3035.92	97.1795
3034.05	97.8129		3034.05	97.2426
3032.19	97.8139		3032.19	97.1579
3030.33	97.6358		3030.33	96.9364
3028.46	97.4813		3028.46	96.8445
3026.6	97.3041		3026.6	96.5719
3024.73	97.0262		3024.73	96.1114
3022.87	96.6179		3022.87	95.8526
3021.01	96.1069		3021.01	95.5311
3019.14	95.7507		3019.14	95.1154
3017.28	95.4961		3017.28	94.7594
3015.42	95.1366		3015.42	94.5138
3013.55	94.8872		3013.55	94.3807
3011.69	94.8077		3011.69	94.2646
3009.83	94.738		3009.83	94.1258
3007.96	94.6683		3007.96	94.0442
3006.1	94.7123		3006.1	94.1059
3004.23	94.9563		3004.23	94.2922
3002.37	95.1709		3002.37	94.4803
3000.51	95.3069		3000.51	94.5177
2998.64	95.4853		2998.64	94.515
2996.78	95.5111		2996.78	94.5589
2994.92	95.332		2994.92	94.4808
2993.05	95.0932		2993.05	94.2494
2991.19	94.7758		2991.19	93.9964
2989.32	94.4424		2989.32	93.784
2987.46	94.1359		2987.46	93.4337
2985.6	93.7656		2985.6	93.01
2983.73	93.3521		2983.73	92.5891
2981.87	92.9507		2981.87	92.0883
2980.01	92.3767		2980.01	91.4479
2978.14	91.4856		2978.14	90.7068
2976.28	90.5494		2976.28	89.8587
2974.42	89.4929		2974.42	88.7885
2972.55	88.0115		2972.55	87.3279
2970.69	86.1041		2970.69	85.4686
2968.82	83.9717		2968.82	83.5044
2966.96	81.939		2966.96	81.7777
2965.1	80.4282		2965.1	80.329
2963.23	79.7439		2963.23	79.5106
2961.37	79.686		2961.37	79.5363
2959.51	80.1409		2959.51	79.9887
2957.64	81.0023		2957.64	80.7286
2955.78	81.9932		2955.78	81.6404
2953.92	83.2044		2953.92	82.6687
2952.05	84.4646		2952.05	83.7061
2950.19	85.4225		2950.19	84.4736
2948.32	85.8217		2948.32	84.8658
2946.46	85.6807		2946.46	84.7612
2944.6	85.3297		2944.6	84.3014
2942.73	84.6788		2942.73	83.4216
2940.87	83.692		2940.87	82.3245
2939.01	82.5774		2939.01	81.2342
2937.14	81.3817		2937.14	80.0874
2935.28	80.2005		2935.28	78.7383
2933.41	78.9501		2933.41	77.2565
2931.55	77.6973		2931.55	75.9147
2929.69	76.6726		2929.69	74.7396
2927.82	75.6442		2927.82	73.6958
2925.96	74.6993		2925.96	72.759
2924.1	74.0724		2924.1	72.0207
2922.23	73.5765		2922.23	71.585
2920.37	73.3031		2920.37	71.3206
2918.51	73.3226		2918.51	71.2701
2916.64	73.5215		2916.64	71.5519
2914.78	73.9516		2914.78	72.1172
2912.91	74.5641		2912.91	72.8372
2911.05	75.2649		2911.05	73.7253
2909.19	75.9965		2909.19	74.5673
2907.32	76.7833		2907.32	75.4172
2905.46	77.5199		2905.46	76.1419
2903.6	78.0015		2903.6	76.8189
2901.73	78.4428		2901.73	77.639
2899.87	78.9956		2899.87	78.3109
2898.01	79.5573		2898.01	78.7184
2896.14	79.9971		2896.14	79.1131
2894.28	80.1709		2894.28	79.3749
2892.41	80.2275		2892.41	79.4293
2890.55	80.266		2890.55	79.4713
2888.69	80.288		2888.69	79.6014
2886.82	80.4234		2886.82	79.8287
2884.96	80.6376		2884.96	80.1139
2883.1	80.8269		2883.1	80.2462
2881.23	80.9246		2881.23	80.3456
2879.37	80.9323		2879.37	80.3209
2877.5	80.8366		2877.5	80.1402
2875.64	80.6457		2875.64	79.9122
2873.78	80.6492		2873.78	79.8991
2871.91	81.0113		2871.91	80.1339
2870.05	81.679		2870.05	80.7137
2868.19	82.4506		2868.19	81.4297
2866.32	82.9225		2866.32	81.9517
2864.46	83.1492		2864.46	82.2275
2862.6	83.3097		2862.6	82.2487
2860.73	82.9204		2860.73	81.785
2858.87	82.1271		2858.87	80.9622
2857	81.5834		2857	80.2091
2855.14	81.5488		2855.14	79.7969
2853.28	81.8728		2853.28	79.762
2851.41	82.3974		2851.41	80.0589
2849.55	83.1871		2849.55	80.6755
2847.69	84.0154		2847.69	81.6835
2845.82	84.6773		2845.82	82.6674
2843.96	85.0819		2843.96	83.2413
2842.1	85.101		2842.1	83.5906
2840.23	84.9912		2840.23	83.6824
2838.37	84.8668		2838.37	83.6219
2836.5	84.7578		2836.5	83.6697
2834.64	84.7794		2834.64	83.7212
2832.78	84.9595		2832.78	84.0193
2830.91	85.6165		2830.91	84.7197
2829.05	86.6539		2829.05	85.7249
2827.19	87.8149		2827.19	86.9056
2825.32	88.9718		2825.32	87.9117
2823.46	89.7971		2823.46	88.5725
2821.59	90.2329		2821.59	89.1672
2819.73	90.5341		2819.73	89.588
2817.87	91.083		2817.87	89.9075
2816	91.725		2816	90.5319
2814.14	92.3032		2814.14	91.2888
2812.28	93.0199		2812.28	91.9264
2810.41	93.6968		2810.41	92.5813
2808.55	94.2412		2808.55	93.2517
2806.69	94.9021		2806.69	93.8978
2804.82	95.5522		2804.82	94.5144
2802.96	95.9892		2802.96	95.0137
2801.09	96.3056		2801.09	95.4383
2799.23	96.6475		2799.23	95.7769
2797.37	97.0484		2797.37	96.0822
2795.5	97.34		2795.5	96.3523
2793.64	97.5371		2793.64	96.6026
2791.78	97.6682		2791.78	96.7888
2789.91	97.7976		2789.91	96.9425
2788.05	97.9122		2788.05	97.1262
2786.19	97.9671		2786.19	97.2279
2784.32	98.0719		2784.32	97.3211
2782.46	98.1941		2782.46	97.4686
2780.59	98.2563		2780.59	97.5636
2778.73	98.2237		2778.73	97.5798
2776.87	98.3766		2776.87	97.6926
2775	98.631		2775	97.7336
2773.14	98.6495		2773.14	97.7436
2771.28	98.5844		2771.28	97.7567
2769.41	98.5497		2769.41	97.727
2767.55	98.5759		2767.55	97.7482
2765.68	98.6256		2765.68	97.7764
2763.82	98.5666		2763.82	97.7659
2761.96	98.5647		2761.96	97.794
2760.09	98.6658		2760.09	97.7951
2758.23	98.6805		2758.23	97.7807
2756.37	98.572		2756.37	97.8179
2754.5	98.5348		2754.5	97.9072
2752.64	98.6113		2752.64	97.9869
2750.78	98.6278		2750.78	97.9954
2748.91	98.5902		2748.91	97.891
2747.05	98.5669		2747.05	97.8799
2745.18	98.5437		2745.18	97.9269
2743.32	98.4976		2743.32	97.8657
2741.46	98.5603		2741.46	97.8959
2739.59	98.6355		2739.59	97.9693
2737.73	98.544		2737.73	98.001
2735.87	98.4329		2735.87	97.8427
2734	98.4465		2734	97.6585
2732.14	98.4511		2732.14	97.6537
2730.27	98.2657		2730.27	97.5489
2728.41	98.0776		2728.41	97.3968
2726.55	97.9917		2726.55	97.2841
2724.68	97.9479		2724.68	97.2817
2722.82	98.0022		2722.82	97.3862
2720.96	98.1585		2720.96	97.5178
2719.09	98.3725		2719.09	97.6742
2717.23	98.549		2717.23	97.8149
2715.37	98.6457		2715.37	97.8666
2713.5	98.7217		2713.5	97.9045
2711.64	98.8111		2711.64	97.9459
2709.77	98.8323		2709.77	98.0853
2707.91	98.9022		2707.91	98.1959
2706.05	98.9972		2706.05	98.2341
2704.18	98.9747		2704.18	98.244
2702.32	98.9639		2702.32	98.1797
2700.46	98.9976		2700.46	98.1632
2698.59	99.0587		2698.59	98.2693
2696.73	99.1389		2696.73	98.351
2694.87	99.1596		2694.87	98.32
2693	99.1158		2693	98.2809
2691.14	99.1039		2691.14	98.3623
2689.27	99.1576		2689.27	98.5184
2687.41	99.2244		2687.41	98.4867
2685.55	99.2497		2685.55	98.4327
2683.68	99.2499		2683.68	98.5385
2681.82	99.1701		2681.82	98.5857
2679.96	99.1012		2679.96	98.4884
2678.09	99.1059		2678.09	98.4097
2676.23	99.0843		2676.23	98.3659
2674.36	99.0576		2674.36	98.3882
2672.5	99.0711		2672.5	98.4031
2670.64	99.0546		2670.64	98.3831
2668.77	99.0483		2668.77	98.4456
2666.91	99.0475		2666.91	98.4706
2665.05	98.996		2665.05	98.4013
2663.18	99.0262		2663.18	98.3634
2661.32	99.0717		2661.32	98.3763
2659.46	99.008		2659.46	98.4619
2657.59	99.0186		2657.59	98.5279
2655.73	99.161		2655.73	98.4391
2653.86	99.1829		2653.86	98.4084
2652	99.1436		2652	98.4574
2650.14	99.1522		2650.14	98.5181
2648.27	99.2125		2648.27	98.5478
2646.41	99.3375		2646.41	98.6189
2644.55	99.3461		2644.55	98.7113
2642.68	99.2653		2642.68	98.6838
2640.82	99.2819		2640.82	98.6092
2638.96	99.2899		2638.96	98.5431
2637.09	99.239		2637.09	98.542
2635.23	99.2632		2635.23	98.5859
2633.36	99.3402		2633.36	98.6503
2631.5	99.3842		2631.5	98.7587
2629.64	99.4071		2629.64	98.8029
2627.77	99.4235		2627.77	98.6704
2625.91	99.3668		2625.91	98.5415
2624.05	99.2477		2624.05	98.6351
2622.18	99.189		2622.18	98.7462
2620.32	99.2257		2620.32	98.7608
2618.45	99.2531		2618.45	98.6481
2616.59	99.2122		2616.59	98.6891
2614.73	99.2348		2614.73	98.7452
2612.86	99.2918		2612.86	98.5745
2611	99.2122		2611	98.3731
2609.14	99.1015		2609.14	98.5384
2607.27	99.1824		2607.27	98.8073
2605.41	99.3384		2605.41	98.8143
2603.55	99.3853		2603.55	98.7649
2601.68	99.3176		2601.68	98.7058
2599.82	99.2556		2599.82	98.5957
2597.95	99.3354		2597.95	98.5758
2596.09	99.3871		2596.09	98.5653
2594.23	99.2946		2594.23	98.5425
2592.36	99.2714		2592.36	98.5241
2590.5	99.2558		2590.5	98.5874
2588.64	99.1874		2588.64	98.8225
2586.77	99.1961		2586.77	98.9114
2584.91	99.3074		2584.91	98.8284
2583.05	99.4257		2583.05	98.7375
2581.18	99.4738		2581.18	98.6456
2579.32	99.4017		2579.32	98.6789
2577.45	99.2975		2577.45	98.6735
2575.59	99.2395		2575.59	98.7136
2573.73	99.2342		2573.73	98.811
2571.86	99.3084		2571.86	98.808
2570	99.3969		2570	98.759
2568.14	99.4427		2568.14	98.7265
2566.27	99.371		2566.27	98.6016
2564.41	99.1026		2564.41	98.5995
2562.54	99.0594		2562.54	98.6262
2560.68	99.4048		2560.68	98.6535
2558.82	99.3726		2558.82	98.7416
2556.95	99.0631		2556.95	98.7978
2555.09	99.1281		2555.09	98.7552
2553.23	99.3732		2553.23	98.8525
2551.36	99.5361		2551.36	98.929
2549.5	99.5978		2549.5	98.8909
2547.64	99.4397		2547.64	98.9495
2545.77	99.2116		2545.77	99.0553
2543.91	99.3855		2543.91	98.9121
2542.04	99.6533		2542.04	98.8472
2540.18	99.5152		2540.18	98.9412
2538.32	99.3672		2538.32	98.9275
2536.45	99.3585		2536.45	98.8346
2534.59	99.339		2534.59	98.8923
2532.73	99.6137		2532.73	98.8834
2530.86	99.8018		2530.86	98.9281
2529	99.601		2529	98.9227
2527.14	99.4702		2527.14	98.9266
2525.27	99.4468		2525.27	98.9608
2523.41	99.4188		2523.41	98.9494
2521.54	99.4919		2521.54	98.9761
2519.68	99.4683		2519.68	99.1119
2517.82	99.4509		2517.82	99.0811
2515.95	99.5061		2515.95	98.9519
2514.09	99.5468		2514.09	98.9851
2512.23	99.6131		2512.23	99.0947
2510.36	99.572		2510.36	98.9911
2508.5	99.513		2508.5	98.929
2506.63	99.5395		2506.63	99.0312
2504.77	99.4782		2504.77	99.0779
2502.91	99.3314		2502.91	99.1547
2501.04	99.3107		2501.04	99.2735
2499.18	99.5392		2499.18	99.2075
2497.32	99.5992		2497.32	98.9871
2495.45	99.4994		2495.45	98.9552
2493.59	99.5297		2493.59	99.034
2491.73	99.6193		2491.73	99.1195
2489.86	99.5901		2489.86	98.9933
2488	99.4325		2488	98.7877
2486.13	99.3407		2486.13	98.8987
2484.27	99.4031		2484.27	99.1718
2482.41	99.5172		2482.41	99.1344
2480.54	99.5732		2480.54	99.1088
2478.68	99.5434		2478.68	99.289
2476.82	99.4408		2476.82	99.1111
2474.95	99.4295		2474.95	98.9366
2473.09	99.4622		2473.09	99.0888
2471.22	99.3137		2471.22	99.1427
2469.36	99.3219		2469.36	99.0724
2467.5	99.4909		2467.5	99.1471
2465.63	99.4411		2465.63	99.2257
2463.77	99.3864		2463.77	99.1971
2461.91	99.6071		2461.91	99.0986
2460.04	99.624		2460.04	98.9703
2458.18	99.4721		2458.18	98.9908
2456.32	99.4052		2456.32	99.1101
2454.45	99.3165		2454.45	99.1274
2452.59	99.4666		2452.59	99.0877
2450.72	99.6505		2450.72	99.0876
2448.86	99.6473		2448.86	99.1185
2447	99.4663		2447	99.1137
2445.13	99.4392		2445.13	98.9475
2443.27	99.5911		2443.27	98.9675
2441.41	99.5828		2441.41	99.1797
2439.54	99.5985		2439.54	99.2845
2437.68	99.7953		2437.68	99.1649
2435.82	99.719		2435.82	99.1014
2433.95	99.5791		2433.95	99.1611
2432.09	99.5778		2432.09	99.0841
2430.22	99.5837		2430.22	99.0946
2428.36	99.614		2428.36	99.2986
2426.5	99.5379		2426.5	99.3077
2424.63	99.579		2424.63	99.262
2422.77	99.6751		2422.77	99.1758
2420.91	99.6213		2420.91	99.2332
2419.04	99.5802		2419.04	99.3726
2417.18	99.6794		2417.18	99.2004
2415.31	99.6422		2415.31	99.1533
2413.45	99.5135		2413.45	99.2693
2411.59	99.6196		2411.59	99.2617
2409.72	99.7845		2409.72	99.0593
2407.86	99.6755		2407.86	99.0076
2406	99.4927		2406	99.0897
2404.13	99.557		2404.13	99.116
2402.27	99.6339		2402.27	99.1566
2400.41	99.5477		2400.41	99.2213
2398.54	99.5044		2398.54	99.2605
2396.68	99.5968		2396.68	99.2941
2394.81	99.6898		2394.81	99.3238
2392.95	99.6765		2392.95	99.2683
2391.09	99.6086		2391.09	99.1701
2389.22	99.513		2389.22	99.186
2387.36	99.6515		2387.36	99.2014
2385.5	99.7933		2385.5	99.1371
2383.63	99.6267		2383.63	99.1646
2381.77	99.5282		2381.77	99.1845
2379.91	99.6153		2379.91	99.0362
2378.04	99.6989		2378.04	98.9327
2376.18	99.8125		2376.18	98.9208
2374.31	99.7493		2374.31	98.9041
2372.45	99.5721		2372.45	98.8865
2370.59	99.5621		2370.59	98.8297
2368.72	99.6031		2368.72	98.7458
2366.86	99.5397		2366.86	98.7637
2365	99.3958		2365	98.7661
2363.13	99.371		2363.13	98.6617
2361.27	99.4768		2361.27	98.6808
2359.4	99.5277		2359.4	98.7308
2357.54	99.7257		2357.54	98.7617
2355.68	99.6987		2355.68	98.707
2353.81	99.5881		2353.81	98.7702
2351.95	99.5661		2351.95	99.0665
2350.09	99.4759		2350.09	99.1971
2348.22	99.5005		2348.22	99.026
2346.36	99.6085		2346.36	98.8407
2344.5	99.6732		2344.5	98.8788
2342.63	99.6634		2342.63	98.8995
2340.77	99.5767		2340.77	98.855
2338.9	99.6332		2338.9	98.8414
2337.04	99.7338		2337.04	98.8495
2335.18	99.6729		2335.18	98.8944
2333.31	99.6355		2333.31	99.0007
2331.45	99.6761		2331.45	99.0906
2329.59	99.6588		2329.59	98.9852
2327.72	99.6422		2327.72	98.9395
2325.86	99.6392		2325.86	98.9967
2324	99.696		2324	99.0209
2322.13	99.8143		2322.13	99.0223
2320.27	99.819		2320.27	99.0364
2318.4	99.7708		2318.4	99.0381
2316.54	99.7655		2316.54	99.0403
2314.68	99.8347		2314.68	99.0246
2312.81	99.8418		2312.81	99.0078
2310.95	99.7954		2310.95	99.0698
2309.09	99.7513		2309.09	99.1908
2307.22	99.6214		2307.22	99.2145
2305.36	99.5771		2305.36	99.121
2303.49	99.6735		2303.49	99.2735
2301.63	99.6725		2301.63	99.2554
2299.77	99.5913		2299.77	99.1392
2297.9	99.6828		2297.9	99.0728
2296.04	99.7869		2296.04	99.0471
2294.18	99.8148		2294.18	99.2542
2292.31	99.778		2292.31	99.5428
2290.45	99.6735		2290.45	99.4935
2288.59	99.6877		2288.59	99.3743
2286.72	99.6321		2286.72	99.332
2284.86	99.6671		2284.86	99.2803
2282.99	99.7585		2282.99	99.151
2281.13	99.6876		2281.13	99.0347
2279.27	99.6718		2279.27	99.1125
2277.4	99.7582		2277.4	99.2098
2275.54	99.7435		2275.54	99.3422
2273.68	99.6662		2273.68	99.3566
2271.81	99.6141		2271.81	99.1915
2269.95	99.5503		2269.95	99.1121
2268.09	99.6617		2268.09	99.2208
2266.22	99.6229		2266.22	99.3497
2264.36	99.6856		2264.36	99.0615
2262.49	100.037		2262.49	99.0723
2260.63	99.9492		2260.63	99.4031
2258.77	99.5668		2258.77	99.4271
2256.9	99.418		2256.9	99.1842
2255.04	99.4775		2255.04	99.1213
2253.18	99.601		2253.18	99.2646
2251.31	99.7679		2251.31	99.2868
2249.45	99.8364		2249.45	99.3292
2247.58	99.6809		2247.58	99.2601
2245.72	99.3608		2245.72	99.025
2243.86	99.2121		2243.86	99.1354
2241.99	99.2193		2241.99	99.3646
2240.13	99.5138		2240.13	99.3682
2238.27	99.9188		2238.27	99.6778
2236.4	99.7949		2236.4	99.8788
2234.54	99.6311		2234.54	99.4154
2232.68	99.9717		2232.68	99.1249
2230.81	100.21		2230.81	99.1343
2228.95	100.027		2228.95	99.3399
2227.08	99.8952		2227.08	99.725
2225.22	99.8017		2225.22	99.8826
2223.36	99.8525		2223.36	99.8623
2221.49	99.7793		2221.49	99.6795
2219.63	99.8028		2219.63	99.4479
2217.77	99.9031		2217.77	99.704
2215.9	99.6493		2215.9	99.7296
2214.04	99.4369		2214.04	99.4313
2212.18	99.5389		2212.18	99.4027
2210.31	99.6707		2210.31	99.6462
2208.45	99.8314		2208.45	99.9163
2206.58	99.8641		2206.58	99.8112
2204.72	99.8465		2204.72	99.5832
2202.86	99.5063		2202.86	99.3171
2200.99	99.4919		2200.99	98.9903
2199.13	100.079		2199.13	98.9697
2197.27	99.9317		2197.27	99.2726
2195.4	99.183		2195.4	99.5405
2193.54	99.199		2193.54	99.4224
2191.67	99.9115		2191.67	99.3412
2189.81	100.419		2189.81	99.2767
2187.95	100.599		2187.95	98.7914
2186.08	100.326		2186.08	99.0354
2184.22	100.014		2184.22	99.315
2182.36	99.6496		2182.36	99.369
2180.49	99.7526		2180.49	99.6107
2178.63	100.044		2178.63	100.097
2176.77	100.114		2176.77	99.6171
2174.9	99.963		2174.9	99.2157
2173.04	99.4398		2173.04	99.5101
2171.17	99.666		2171.17	99.4523
2169.31	100.052		2169.31	99.564
2167.45	99.8704		2167.45	99.6278
2165.58	99.8335		2165.58	99.4931
2163.72	99.817		2163.72	99.4596
2161.86	99.8411		2161.86	99.4677
2159.99	100.267		2159.99	99.4146
2158.13	100.452		2158.13	99.6969
2156.26	99.7578		2156.26	100.244
2154.4	99.4591		2154.4	100.374
2152.54	99.8114		2152.54	99.9775
2150.67	99.8257		2150.67	100.18
2148.81	99.7154		2148.81	100.055
2146.95	99.7767		2146.95	99.8004
2145.08	99.6267		2145.08	99.7375
2143.22	99.6443		2143.22	99.8758
2141.36	99.8361		2141.36	99.7148
2139.49	99.9515		2139.49	99.597
2137.63	100.077		2137.63	99.826
2135.76	99.891		2135.76	99.6528
2133.9	99.8441		2133.9	99.5873
2132.04	99.775		2132.04	99.5665
2130.17	99.5543		2130.17	99.5882
2128.31	99.9712		2128.31	99.5698
2126.45	100.247		2126.45	99.5433
2124.58	99.9303		2124.58	99.7242
2122.72	99.6701		2122.72	99.8328
2120.86	99.5832		2120.86	99.5496
2118.99	99.5742		2118.99	99.5659
2117.13	99.7		2117.13	99.545
2115.26	99.9201		2115.26	99.0788
2113.4	100.012		2113.4	99.0951
2111.54	99.9167		2111.54	99.4274
2109.67	99.8522		2109.67	99.4026
2107.81	100.047		2107.81	99.3519
2105.95	99.9869		2105.95	99.596
2104.08	99.6957		2104.08	99.5947
2102.22	99.8518		2102.22	99.4978
2100.35	100.119		2100.35	99.2646
2098.49	100.089		2098.49	99.3793
2096.63	99.9675		2096.63	99.8164
2094.76	99.9113		2094.76	99.7597
2092.9	100.157		2092.9	99.6636
2091.04	99.9079		2091.04	99.7831
2089.17	99.5017		2089.17	99.8237
2087.31	99.7257		2087.31	99.6069
2085.45	99.7477		2085.45	99.7063
2083.58	99.56		2083.58	99.6957
2081.72	99.7003		2081.72	99.4757
2079.85	99.8638		2079.85	99.5957
2077.99	100.039		2077.99	99.7302
2076.13	99.981		2076.13	99.5095
2074.26	99.7765		2074.26	99.351
2072.4	99.7673		2072.4	99.1584
2070.54	100.079		2070.54	99.2048
2068.67	100.385		2068.67	99.4148
2066.81	100.238		2066.81	99.6288
2064.95	99.8433		2064.95	99.8529
2063.08	99.5266		2063.08	99.6444
2061.22	99.3848		2061.22	99.3918
2059.35	99.4644		2059.35	99.5884
2057.49	99.7849		2057.49	99.9036
2055.63	100.034		2055.63	99.5922
2053.76	100.037		2053.76	99.2098
2051.9	100.154		2051.9	99.2899
2050.04	100.035		2050.04	99.3259
2048.17	99.9707		2048.17	99.3743
2046.31	100.342		2046.31	99.5309
2044.44	100.468		2044.44	99.703
2042.58	100.163		2042.58	99.4741
2040.72	99.9417		2040.72	99.3576
2038.85	100.144		2038.85	99.4741
2036.99	100.227		2036.99	99.3753
2035.13	100.198		2035.13	99.2982
2033.26	99.9337		2033.26	99.4958
2031.4	99.8951		2031.4	99.7502
2029.54	100.517		2029.54	99.4999
2027.67	101.216		2027.67	99.3028
2025.81	101.307		2025.81	99.485
2023.94	100.378		2023.94	99.3687
2022.08	99.874		2022.08	99.6112
2020.22	100.146		2020.22	100.382
2018.35	100.208		2018.35	100.306
2016.49	99.949		2016.49	99.9716
2014.63	99.6558		2014.63	100.016
2012.76	99.4794		2012.76	99.9094
2010.9	99.4733		2010.9	99.248
2009.04	99.7444		2009.04	99.221
2007.17	99.9286		2007.17	99.6386
2005.31	99.827		2005.31	99.8559
2003.44	99.7123		2003.44	99.8468
2001.58	99.5967		2001.58	99.6385
1999.72	99.6953		1999.72	99.5809
1997.85	99.7337		1997.85	99.5408
1995.99	99.761		1995.99	100.105
1994.13	99.8365		1994.13	100.309
1992.26	99.9862		1992.26	99.4574
1990.4	100.115		1990.4	99.3317
1988.53	99.7289		1988.53	99.5701
1986.67	99.3162		1986.67	99.5213
1984.81	99.3184		1984.81	99.491
1982.94	99.5424		1982.94	99.5549
1981.08	100.086		1981.08	99.634
1979.22	100.227		1979.22	99.7027
1977.35	100.422		1977.35	99.6233
1975.49	100.963		1975.49	99.5985
1973.63	101.11		1973.63	100.239
1971.76	100.925		1971.76	100.366
1969.9	100.699		1969.9	99.5614
1968.03	100.229		1968.03	99.138
1966.17	99.444		1966.17	99.1036
1964.31	98.9272		1964.31	98.8792
1962.44	99.2364		1962.44	99.1291
1960.58	99.6784		1960.58	99.7539
1958.72	99.6765		1958.72	100.145
1956.85	99.6642		1956.85	99.8597
1954.99	99.565		1954.99	99.6698
1953.13	99.382		1953.13	99.5916
1951.26	99.6068		1951.26	99.9125
1949.4	100.21		1949.4	100.303
1947.53	100.131		1947.53	99.8485
1945.67	99.5567		1945.67	99.4964
1943.81	99.3208		1943.81	99.7775
1941.94	99.5477		1941.94	99.9253
1940.08	99.7096		1940.08	99.5299
1938.22	99.6974		1938.22	99.2006
1936.35	99.7115		1936.35	99.3144
1934.49	99.8647		1934.49	99.5026
1932.62	99.779		1932.62	99.5637
1930.76	99.648		1930.76	99.8762
1928.9	99.8067		1928.9	99.7478
1927.03	99.6939		1927.03	99.5232
1925.17	99.6859		1925.17	99.4122
1923.31	99.9294		1923.31	99.5068
1921.44	100.217		1921.44	99.6759
1919.58	99.9981		1919.58	99.6361
1917.72	99.5702		1917.72	99.5141
1915.85	99.528		1915.85	99.502
1913.99	99.6367		1913.99	99.6701
1912.12	99.7871		1912.12	99.6447
1910.26	99.7644		1910.26	99.6025
1908.4	99.8617		1908.4	99.9373
1906.53	99.936		1906.53	99.726
1904.67	99.7836		1904.67	99.314
1902.81	99.6764		1902.81	99.3563
1900.94	99.7137		1900.94	99.5425
1899.08	99.8812		1899.08	99.6299
1897.21	99.9244		1897.21	99.6233
1895.35	99.5951		1895.35	99.6751
1893.49	99.4312		1893.49	99.6658
1891.62	99.5825		1891.62	99.4599
1889.76	99.7468		1889.76	99.5589
1887.9	99.7552		1887.9	99.7341
1886.03	99.9331		1886.03	99.6769
1884.17	100.05		1884.17	99.5781
1882.31	99.9179		1882.31	99.4307
1880.44	99.7877		1880.44	99.4554
1878.58	99.608		1878.58	99.6144
1876.71	99.5683		1876.71	99.6062
1874.85	99.6491		1874.85	99.4973
1872.99	99.7258		1872.99	99.2762
1871.12	99.7738		1871.12	99.2212
1869.26	99.6914		1869.26	99.3819
1867.4	99.6768		1867.4	99.5261
1865.53	99.7257		1865.53	99.5915
1863.67	99.7021		1863.67	99.4797
1861.81	99.5747		1861.81	99.4216
1859.94	99.5593		1859.94	99.393
1858.08	99.6527		1858.08	99.3263
1856.21	99.6579		1856.21	99.4178
1854.35	99.5606		1854.35	99.4864
1852.49	99.6031		1852.49	99.396
1850.62	99.6404		1850.62	99.3478
1848.76	99.629		1848.76	99.3617
1846.9	99.7525		1846.9	99.3184
1845.03	99.7168		1845.03	99.3671
1843.17	99.5284		1843.17	99.4807
1841.3	99.5866		1841.3	99.4452
1839.44	99.6789		1839.44	99.4027
1837.58	99.6185		1837.58	99.4043
1835.71	99.5656		1835.71	99.3547
1833.85	99.7083		1833.85	99.2899
1831.99	99.8689		1831.99	99.3983
1830.12	99.7436		1830.12	99.5436
1828.26	99.575		1828.26	99.4544
1826.4	99.6408		1826.4	99.3676
1824.53	99.7204		1824.53	99.4231
1822.67	99.6445		1822.67	99.4525
1820.8	99.658		1820.8	99.4136
1818.94	99.7602		1818.94	99.3214
1817.08	99.8606		1817.08	99.3427
1815.21	99.7081		1815.21	99.3295
1813.35	99.492		1813.35	99.2523
1811.49	99.4969		1811.49	99.3113
1809.62	99.4932		1809.62	99.3292
1807.76	99.4469		1807.76	99.2559
1805.9	99.4464		1805.9	99.204
1804.03	99.4856		1804.03	99.1157
1802.17	99.5064		1802.17	99.0055
1800.3	99.4132		1800.3	99.0091
1798.44	99.3152		1798.44	98.982
1796.58	99.1901		1796.58	98.9423
1794.71	99.1953		1794.71	98.8413
1792.85	99.2406		1792.85	98.7372
1790.99	99.0996		1790.99	98.7614
1789.12	98.9725		1789.12	98.6349
1787.26	98.9482		1787.26	98.527
1785.39	98.857		1785.39	98.454
1783.53	98.726		1783.53	98.3768
1781.67	98.6795		1781.67	98.3633
1779.8	98.683		1779.8	98.4254
1777.94	98.64		1777.94	98.4153
1776.08	98.6573		1776.08	98.3305
1774.21	98.8485		1774.21	98.3209
1772.35	98.9571		1772.35	98.3484
1770.49	99.0041		1770.49	98.436
1768.62	99.0919		1768.62	98.4909
1766.76	99.0905		1766.76	98.5694
1764.89	99.0784		1764.89	98.5565
1763.03	99.0892		1763.03	98.4115
1761.17	99.0177		1761.17	98.329
1759.3	98.9209		1759.3	98.2519
1757.44	98.8206		1757.44	98.1009
1755.58	98.7031		1755.58	97.8772
1753.71	98.5688		1753.71	97.572
1751.85	98.2941		1751.85	97.2972
1749.99	98.0374		1749.99	97.0225
1748.12	97.9088		1748.12	96.5375
1746.26	97.7683		1746.26	96.1918
1744.39	97.5188		1744.39	95.988
1742.53	97.3975		1742.53	95.7705
1740.67	97.5286		1740.67	95.6815
1738.8	97.5677		1738.8	95.6442
1736.94	97.6442		1736.94	95.5409
1735.08	97.6607		1735.08	95.2919
1733.21	97.535		1733.21	95.5081
1731.35	97.6689		1731.35	95.7161
1729.48	97.8119		1729.48	95.744
1727.62	97.8658		1727.62	95.797
1725.76	97.9752		1725.76	95.8518
1723.89	98.0162		1723.89	95.9589
1722.03	98.0506		1722.03	96.0274
1720.17	98.0994		1720.17	95.8832
1718.3	97.9853		1718.3	95.7889
1716.44	97.8816		1716.44	96.043
1714.58	97.8648		1714.58	96.1982
1712.71	97.8333		1712.71	96.2038
1710.85	97.8323		1710.85	96.187
1708.98	97.9243		1708.98	96.2004
1707.12	98.0122		1707.12	96.2139
1705.26	97.9789		1705.26	96.3155
1703.39	97.9476		1703.39	96.3435
1701.53	97.7268		1701.53	96.0528
1699.67	97.1368		1699.67	95.7474
1697.8	96.7718		1697.8	95.3325
1695.94	96.253		1695.94	94.8027
1694.08	95.7818		1694.08	94.5447
1692.21	95.6131		1692.21	94.2938
1690.35	95.7188		1690.35	94.2583
1688.48	96.0784		1688.48	94.5138
1686.62	96.3287		1686.62	94.6554
1684.76	96.5852		1684.76	94.9596
1682.89	97.0322		1682.89	95.7328
1681.03	97.3041		1681.03	96.0157
1679.17	97.3498		1679.17	96.0479
1677.3	97.3787		1677.3	96.0095
1675.44	97.4227		1675.44	96.1425
1673.57	97.4785		1673.57	96.451
1671.71	97.6164		1671.71	96.545
1669.85	97.7454		1669.85	96.6763
1667.98	97.7425		1667.98	96.7858
1666.12	97.7159		1666.12	96.6541
1664.26	97.6583		1664.26	96.3113
1662.39	97.5011		1662.39	95.9847
1660.53	97.2265		1660.53	95.5624
1658.67	96.8276		1658.67	94.8652
1656.8	96.4591		1656.8	93.7891
1654.94	96.1893		1654.94	92.5786
1653.07	94.7959		1653.07	91.0025
1651.21	93.0474		1651.21	89.4004
1649.35	91.5733		1649.35	87.6768
1647.48	89.0644		1647.48	85.1528
1645.62	86.3069		1645.62	82.7071
1643.76	85.4423		1643.76	81.8911
1641.89	86.1598		1641.89	82.467
1640.03	87.7895		1640.03	83.9457
1638.16	89.3617		1638.16	85.2775
1636.3	90.9423		1636.3	86.5304
1634.44	92.717		1634.44	88.4545
1632.57	93.7499		1632.57	89.6227
1630.71	94.3368		1630.71	90.2208
1628.85	94.8347		1628.85	90.7416
1626.98	95.3794		1626.98	91.5019
1625.12	95.7899		1625.12	92.1352
1623.26	96.1798		1623.26	92.8898
1621.39	96.5511		1621.39	93.5901
1619.53	96.798		1619.53	93.7576
1617.66	96.8729		1617.66	93.7011
1615.8	96.7549		1615.8	93.8291
1613.94	96.6617		1613.94	93.8657
1612.07	96.5286		1612.07	93.5649
1610.21	96.31		1610.21	93.0609
1608.35	96.0166		1608.35	92.5217
1606.48	95.8676		1606.48	92.175
1604.62	95.9342		1604.62	92.0374
1602.76	96.0896		1602.76	92.1075
1600.89	96.2178		1600.89	92.328
1599.03	96.2573		1599.03	92.5495
1597.16	96.2536		1597.16	92.6541
1595.3	96.2781		1595.3	92.7266
1593.44	96.3137		1593.44	92.7277
1591.57	96.4034		1591.57	92.7114
1589.71	96.459		1589.71	92.7562
1587.85	96.4781		1587.85	92.8514
1585.98	96.4406		1585.98	93.0138
1584.12	96.455		1584.12	93.2627
1582.25	96.592		1582.25	93.5839
1580.39	96.8056		1580.39	93.9297
1578.53	97.1018		1578.53	94.1628
1576.66	97.3767		1576.66	94.3828
1574.8	97.5374		1574.8	94.9434
1572.94	97.6698		1572.94	95.2485
1571.07	97.7854		1571.07	95.2352
1569.21	97.8317		1569.21	95.3635
1567.35	97.9525		1567.35	95.6408
1565.48	98.116		1565.48	95.8182
1563.62	98.297		1563.62	95.9582
1561.75	98.479		1561.75	95.9544
1559.89	98.4853		1559.89	96.0646
1558.03	98.5803		1558.03	97.0283
1556.16	98.8151		1556.16	97.5853
1554.3	98.7824		1554.3	97.6146
1552.44	98.7548		1552.44	97.6405
1550.57	98.7886		1550.57	97.7215
1548.71	98.8742		1548.71	97.7844
1546.85	99.0328		1546.85	97.791
1544.98	99.0123		1544.98	97.7785
1543.12	99.0051		1543.12	97.7288
1541.25	99.0495		1541.25	97.7011
1539.39	98.7727		1539.39	97.98
1537.53	98.7153		1537.53	98.1069
1535.66	98.8734		1535.66	97.9594
1533.8	98.8971		1533.8	97.8051
1531.94	98.7665		1531.94	97.7507
1530.07	98.704		1530.07	97.545
1528.21	98.663		1528.21	97.253
1526.34	98.3456		1526.34	96.8054
1524.48	97.8114		1524.48	95.9464
1522.62	97.2961		1522.62	94.7427
1520.75	96.5847		1520.75	93.3802
1518.89	96.0875		1518.89	92.2788
1517.03	95.6605		1517.03	91.3186
1515.16	95.3361		1515.16	90.7502
1513.3	95.391		1513.3	90.7525
1511.44	95.8373		1511.44	91.5048
1509.57	96.4364		1509.57	92.4354
1507.71	96.9029		1507.71	93.3937
1505.84	97.3759		1505.84	95.0793
1503.98	97.7141		1503.98	95.9662
1502.12	97.8595		1502.12	96.1415
1500.25	97.9134		1500.25	96.2425
1498.39	97.9166		1498.39	96.3469
1496.53	97.8279		1496.53	96.4063
1494.66	97.734		1494.66	96.4605
1492.8	97.7439		1492.8	96.3449
1490.94	97.7334		1490.94	96.0537
1489.07	97.5193		1489.07	95.7783
1487.21	97.1619		1487.21	95.304
1485.34	96.8012		1485.34	94.5694
1483.48	96.3801		1483.48	93.7002
1481.62	95.859		1481.62	92.8825
1479.75	95.4355		1479.75	92.4496
1477.89	95.1507		1477.89	92.26
1476.03	94.8695		1476.03	92.0728
1474.16	94.434		1474.16	91.5783
1472.3	93.3866		1472.3	90.5162
1470.43	91.965		1470.43	88.9475
1468.57	90.539		1468.57	86.9888
1466.71	89.2092		1466.71	85.0762
1464.84	88.1347		1464.84	83.6198
1462.98	87.534		1462.98	83.0306
1461.12	86.9718		1461.12	82.6058
1459.25	86.1554		1459.25	81.8395
1457.39	84.641		1457.39	80.6585
1455.53	82.867		1455.53	79.7153
1453.66	81.6087		1453.66	78.8515
1451.8	80.7983		1451.8	78.2006
1449.93	80.3851		1449.93	77.6874
1448.07	80.1629		1448.07	77.3713
1446.21	80.0501		1446.21	77.3245
1444.34	79.8783		1444.34	77.2491
1442.48	79.3755		1442.48	76.8953
1440.62	78.5078		1440.62	76.1663
1438.75	77.2466		1438.75	74.9564
1436.89	76.1838		1436.89	74.0598
1435.03	76.7324		1435.03	74.7531
1433.16	78.1351		1433.16	76.0081
1431.3	79.7678		1431.3	77.3611
1429.43	81.8726		1429.43	78.9522
1427.57	84.0348		1427.57	80.4454
1425.71	85.8794		1425.71	81.7743
1423.84	87.7896		1423.84	83.5796
1421.98	89.426		1421.98	85.2728
1420.12	90.5454		1420.12	86.4546
1418.25	91.8096		1418.25	88.1597
1416.39	92.8475		1416.39	89.4191
1414.52	93.3952		1414.52	89.7206
1412.66	93.4849		1412.66	89.3079
1410.8	93.3017		1410.8	88.6848
1408.93	93.1124		1408.93	88.2779
1407.07	93.2425		1407.07	88.499
1405.21	93.7073		1405.21	89.5113
1403.34	94.3373		1403.34	90.86
1401.48	94.8236		1401.48	91.736
1399.62	95.1433		1399.62	92.3663
1397.75	95.2782		1397.75	92.8328
1395.89	95.2778		1395.89	93.0097
1394.02	95.1871		1394.02	93.104
1392.16	95.0298		1392.16	93.0367
1390.3	94.719		1390.3	92.6606
1388.43	94.2265		1388.43	92.0315
1386.57	93.3607		1386.57	91.1344
1384.71	92.2696		1384.71	90.0247
1382.84	90.9388		1382.84	88.4852
1380.98	89.0547		1380.98	86.3466
1379.11	86.2665		1379.11	83.2671
1377.25	83.8162		1377.25	80.3703
1375.39	83.1186		1375.39	78.9745
1373.52	84.1077		1373.52	79.0825
1371.66	85.4865		1371.66	79.6619
1369.8	86.6899		1369.8	80.2196
1367.93	87.7677		1367.93	80.8352
1366.07	88.5679		1366.07	81.3528
1364.21	88.9326		1364.21	81.5725
1362.34	89.2492		1362.34	82.0972
1360.48	90.0255		1360.48	83.3322
1358.61	91.1969		1358.61	84.9374
1356.75	92.3181		1356.75	86.4595
1354.89	93.2362		1354.89	87.7541
1353.02	93.915		1353.02	88.865
1351.16	94.5222		1351.16	89.9139
1349.3	95.0771		1349.3	90.8836
1347.43	95.5081		1347.43	91.7295
1345.57	95.7707		1345.57	92.3212
1343.71	95.8897		1343.71	92.6377
1341.84	95.9498		1341.84	92.7419
1339.98	95.9298		1339.98	92.6973
1338.11	95.6451		1338.11	92.4022
1336.25	95.2149		1336.25	91.8407
1334.39	94.8386		1334.39	91.3165
1332.52	94.6302		1332.52	91.1645
1330.66	94.6589		1330.66	91.3537
1328.8	94.8694		1328.8	91.7898
1326.93	95.1553		1326.93	92.3218
1325.07	95.5076		1325.07	92.8891
1323.2	95.9057		1323.2	93.4159
1321.34	96.2421		1321.34	93.8368
1319.48	96.3828		1319.48	94.0254
1317.61	96.3762		1317.61	93.9868
1315.75	96.2145		1315.75	93.791
1313.89	95.8654		1313.89	93.3543
1312.02	95.4181		1312.02	92.7423
1310.16	95.0867		1310.16	92.1904
1308.3	94.9652		1308.3	91.8846
1306.43	94.9681		1306.43	91.7959
1304.57	95.0114		1304.57	91.8315
1302.7	95.1338		1302.7	92.0441
1300.84	95.3602		1300.84	92.4027
1298.98	95.6653		1298.98	92.796
1297.11	95.8312		1297.11	93.0907
1295.25	95.8006		1295.25	93.1545
1293.39	95.628		1293.39	92.9362
1291.52	95.3348		1291.52	92.5637
1289.66	95.0143		1289.66	92.1552
1287.8	94.8532		1287.8	91.9219
1285.93	94.8404		1285.93	91.8359
1284.07	95.0083		1284.07	91.7994
1282.2	95.1944		1282.2	91.5668
1280.34	95.1825		1280.34	90.9379
1278.48	94.9699		1278.48	90.0084
1276.61	94.5959		1276.61	89.0904
1274.75	94.2239		1274.75	88.4246
1272.89	94.0369		1272.89	88.0425
1271.02	93.9272		1271.02	87.8024
1269.16	93.7447		1269.16	87.6397
1267.29	93.4348		1267.29	87.4576
1265.43	92.7726		1265.43	87.1764
1263.57	91.6286		1263.57	86.6984
1261.7	90.5495		1261.7	86.285
1259.84	90.2755		1259.84	86.4431
1257.98	90.9309		1257.98	87.185
1256.11	91.9697		1256.11	88.1053
1254.25	92.8287		1254.25	88.9075
1252.39	93.3093		1252.39	89.339
1250.52	93.4284		1250.52	89.4344
1248.66	93.1627		1248.66	89.1893
1246.79	92.7017		1246.79	88.8372
1244.93	92.3412		1244.93	88.6645
1243.07	92.2895		1243.07	88.7385
1241.2	92.4801		1241.2	89.0529
1239.34	92.7656		1239.34	89.4649
1237.48	93.089		1237.48	89.8562
1235.61	93.4234		1235.61	90.1652
1233.75	93.6911		1233.75	90.3383
1231.89	93.8683		1231.89	90.3594
1230.02	93.8823		1230.02	90.2231
1228.16	93.8636		1228.16	90.0395
1226.29	93.9713		1226.29	89.916
1224.43	94.2784		1224.43	89.973
1222.57	94.6586		1222.57	90.1196
1220.7	94.9372		1220.7	90.3681
1218.84	95.1975		1218.84	90.6836
1216.98	95.4116		1216.98	91.052
1215.11	95.5488		1215.11	91.4002
1213.25	95.6864		1213.25	91.6406
1211.38	95.7069		1211.38	91.8164
1209.52	95.5832		1209.52	91.9231
1207.66	95.4143		1207.66	91.9632
1205.79	95.3233		1205.79	92.0561
1203.93	95.3402		1203.93	92.1318
1202.07	95.2805		1202.07	92.0373
1200.2	95.0401		1200.2	91.7336
1198.34	94.8625		1198.34	91.4769
1196.48	94.9602		1196.48	91.4445
1194.61	95.2159		1194.61	91.53
1192.75	95.3863		1192.75	91.5858
1190.88	95.4417		1190.88	91.64
1189.02	95.5396		1189.02	91.6839
1187.16	95.646		1187.16	91.5629
1185.29	95.5738		1185.29	91.2083
1183.43	95.307		1183.43	90.6654
1181.57	95.0103		1181.57	90.1129
1179.7	94.7131		1179.7	89.7244
1177.84	94.5258		1177.84	89.5638
1175.98	94.38		1175.98	89.5345
1174.11	94.2238		1174.11	89.5228
1172.25	94.3679		1172.25	89.8418
1170.38	94.775		1170.38	90.5681
1168.52	95.0129		1168.52	91.2312
1166.66	94.9536		1166.66	91.5468
1164.79	94.5918		1164.79	91.4533
1162.93	93.9754		1162.93	90.9451
1161.07	93.2007		1161.07	90.214
1159.2	92.2369		1159.2	89.3019
1157.34	91.1286		1157.34	88.1975
1155.47	90.4358		1155.47	87.4789
1153.61	90.7703		1153.61	87.6847
1151.75	91.4261		1151.75	88.0373
1149.88	91.2173		1149.88	87.4463
1148.02	90.4953		1148.02	86.3604
1146.16	90.6892		1146.16	86.3371
1144.29	91.9859		1144.29	87.6733
1142.43	93.4345		1142.43	89.3611
1140.57	94.3869		1140.57	90.6637
1138.7	94.8739		1138.7	91.395
1136.84	95.1766		1136.84	91.7323
1134.97	95.3512		1134.97	91.927
1133.11	95.3077		1133.11	92.0462
1131.25	95.1917		1131.25	92.0163
1129.38	95.0152		1129.38	91.8767
1127.52	94.8044		1127.52	91.726
1125.66	94.7375		1125.66	91.5801
1123.79	94.6537		1123.79	91.2979
1121.93	94.4163		1121.93	90.8285
1120.07	94.0012		1120.07	90.1914
1118.2	93.4952		1118.2	89.3731
1116.34	93.0242		1116.34	88.35
1114.47	92.5459		1114.47	87.346
1112.61	92.1483		1112.61	86.5168
1110.75	91.8852		1110.75	86.0044
1108.88	91.6915		1108.88	86.0849
1107.02	91.6984		1107.02	86.7285
1105.16	91.9533		1105.16	87.7356
1103.29	92.2838		1103.29	88.7765
1101.43	92.5316		1101.43	89.6664
1099.56	92.7702		1099.56	90.4764
1097.7	92.9801		1097.7	91.1109
1095.84	93.1137		1095.84	91.4689
1093.97	93.0723		1093.97	91.489
1092.11	92.7604		1092.11	91.1481
1090.25	92.5197		1090.25	90.7346
1088.38	92.5888		1088.38	90.5967
1086.52	92.7107		1086.52	90.4579
1084.66	92.6544		1084.66	89.7213
1082.79	92.3594		1082.79	88.4248
1080.93	91.8714		1080.93	86.991
1079.06	91.4492		1079.06	85.8018
1077.2	91.3587		1077.2	85.2656
1075.34	91.6314		1075.34	85.5567
1073.47	92.2519		1073.47	86.7439
1071.61	93.1355		1071.61	88.5879
1069.75	93.9259		1069.75	90.3395
1067.88	94.3422		1067.88	91.5131
1066.02	94.5268		1066.02	92.2365
1064.15	94.6152		1064.15	92.6506
1062.29	94.5761		1062.29	92.8133
1060.43	94.4072		1060.43	92.8092
1058.56	94.1258		1058.56	92.6119
1056.7	93.5841		1056.7	92.1843
1054.84	92.7484		1054.84	91.3653
1052.97	91.774		1052.97	90.2315
1051.11	91.0755		1051.11	89.3173
1049.25	91.0674		1049.25	88.9616
1047.38	91.4924		1047.38	88.8588
1045.52	91.7835		1045.52	88.6169
1043.65	91.7792		1043.65	88.0922
1041.79	91.5328		1041.79	87.4765
1039.93	91.1868		1039.93	87.0252
1038.06	90.9908		1038.06	86.8057
1036.2	90.8749		1036.2	86.5947
1034.34	90.7576		1034.34	86.2711
1032.47	90.6378		1032.47	86.0863
1030.61	90.4736		1030.61	86.157
1028.75	90.3339		1028.75	86.3995
1026.88	90.2204		1026.88	86.6547
1025.02	90.0031		1025.02	86.6561
1023.15	89.6789		1023.15	86.2988
1021.29	89.2273		1021.29	85.5002
1019.43	88.6163		1019.43	84.3125
1017.56	88.0917		1017.56	83.3769
1015.7	88.0689		1015.7	83.313
1013.84	88.6936		1013.84	84.1129
1011.97	89.6217		1011.97	85.5036
1010.11	90.685		1010.11	87.1209
1008.24	91.9285		1008.24	88.6953
1006.38	93.1158		1006.38	90.1167
1004.52	93.9827		1004.52	91.175
1002.65	94.6307		1002.65	91.8795
1000.79	95.0444		1000.79	92.3796
998.927	95.1581		998.927	92.7178
997.063	95.2247		997.063	92.8541
995.199	95.2887		995.199	92.8977
993.336	95.2139		993.336	92.883
991.472	95.0186		991.472	92.7656
989.608	94.7685		989.608	92.5989
987.745	94.5981		987.745	92.4474
985.881	94.6669		985.881	92.4122
984.017	94.8852		984.017	92.5352
982.154	95.1424		982.154	92.6037
980.29	95.3649		980.29	92.6392
978.426	95.5544		978.426	92.7415
976.563	95.7259		976.563	92.8036
974.699	95.8941		974.699	92.841
972.835	96.048		972.835	92.8312
970.972	96.0941		970.972	92.7673
969.108	96.0136		969.108	92.694
967.244	95.8109		967.244	92.6842
965.38	95.4579		965.38	92.5848
963.517	94.8923		963.517	92.1614
961.653	94.0586		961.653	91.3598
959.789	93.0039		959.789	90.3011
957.926	92.1314		957.926	89.3301
956.062	91.932		956.062	89.0631
954.198	92.2369		954.198	89.2524
952.335	92.0438		952.335	88.9
950.471	90.946		950.471	87.7594
948.607	89.8132		948.607	86.6527
946.744	89.6666		946.744	86.6516
944.88	90.6417		944.88	87.8394
943.016	92.1651		943.016	89.4589
941.153	93.6574		941.153	90.9271
939.289	94.8065		939.289	92.2401
937.425	95.5664		937.425	93.3888
935.562	96.0694		935.562	94.1396
933.698	96.349		933.698	94.4262
931.834	96.4292		931.834	94.4304
929.971	96.4075		929.971	94.3344
928.107	96.2447		928.107	94.1197
926.243	95.8609		926.243	93.7466
924.38	95.3612		924.38	93.2444
922.516	94.5755		922.516	92.4309
920.652	93.4188		920.652	91.2591
918.789	91.967		918.789	89.6598
916.925	89.4753		916.925	87.1004
915.061	86.5515		915.061	84.1884
913.198	86.2038		913.198	83.7864
911.334	88.752		911.334	86.3759
909.47	91.4137		909.47	89.1593
907.607	92.7502		907.607	90.6787
905.743	93.1171		905.743	91.0468
903.879	92.7811		903.879	90.7584
902.016	91.9289		902.016	90.0189
900.152	90.7162		900.152	88.6995
898.288	88.7441		898.288	86.6729
896.425	85.749		896.425	83.6629
894.561	81.729		894.561	79.5218
892.697	76.5151		892.697	74.3788
890.834	70.2935		890.834	68.5359
888.97	63.9271		888.97	62.7044
887.106	59.4074		887.106	58.6316
885.243	59.035		885.243	58.2129
883.379	63.3285		883.379	62.0252
881.515	70.3399		881.515	68.5015
879.652	77.2987		879.652	75.0332
877.788	82.7819		877.788	80.2877
875.924	86.6561		875.924	84.2396
874.061	89.3032		874.061	87.0445
872.197	91.1248		872.197	88.9849
870.333	92.5409		870.333	90.3877
868.47	93.6507		868.47	91.3523
866.606	94.3789		866.606	91.9801
864.742	94.875		864.742	92.4375
862.879	95.247		862.879	92.841
861.015	95.5789		861.015	93.1613
859.151	95.8261		859.151	93.3914
857.288	95.8108		857.288	93.5192
855.424	95.7964		855.424	93.4884
853.56	95.8016		853.56	93.2917
851.697	95.8169		851.697	93.1918
849.833	95.869		849.833	93.1687
847.969	95.9269		847.969	93.0733
846.106	95.9301		846.106	92.9273
844.242	95.9049		844.242	92.8856
842.378	95.8336		842.378	92.6946
840.515	95.6566		840.515	92.3818
838.651	95.4445		838.651	91.7714
836.787	95.1315		836.787	91.0108
834.924	94.7785		834.924	90.762
833.06	94.7981		833.06	91.0317
831.196	95.1869		831.196	91.4081
829.333	95.4294		829.333	91.6604
827.469	95.4003		827.469	92.2925
825.605	95.1914		825.605	93.0813
823.742	94.9181		823.742	93.5152
821.878	94.6721		821.878	93.5661
820.014	94.3885		820.014	93.3993
818.151	93.8217		818.151	93.2145
816.287	93.1445		816.287	92.7888
814.423	92.5604		814.423	92.2624
812.56	92.2165		812.56	91.7889
810.696	91.8093		810.696	91.0788
808.832	90.8979		808.832	90.0151
806.969	89.499		806.969	88.5967
805.105	87.6794		805.105	86.7992
803.241	85.5677		803.241	84.4611
801.378	83.1988		801.378	81.7473
799.514	80.6983		799.514	79.214
797.65	78.7933		797.65	77.6882
795.787	79.5082		795.787	78.6646
793.923	83.0265		793.923	82.0665
792.059	86.1893		792.059	85.1261
790.196	86.8359		790.196	85.7532
788.332	86.4414		788.332	85.2295
786.468	87.1018		786.468	85.6186
784.605	87.6368		784.605	85.8873
782.741	87.2688		782.741	85.2634
780.877	87.6771		780.877	85.5269
779.014	89.8266		779.014	87.7153
777.15	92.6434		777.15	90.3225
775.286	94.647		775.286	92.1228
773.423	95.6638		773.423	93.2176
771.559	96.2273		771.559	93.8955
769.695	96.5621		769.695	94.2234
767.832	96.7025		767.832	94.3925
765.968	96.6366		765.968	94.4477
764.104	96.164		764.104	94.1062
762.241	95.5908		762.241	93.41
760.377	95.1974		760.377	92.8317
758.513	94.8185		758.513	92.6408
756.65	94.8551		756.65	92.7244
754.786	95.4109		754.786	93.1193
752.922	95.7971		752.922	93.3524
751.059	95.697		751.059	93.1758
749.195	95.5838		749.195	93.1021
747.331	96.016		747.331	93.5675
745.468	96.8389		745.468	94.4536
743.604	97.3564		743.604	95.2051
741.74	97.5515		741.74	95.4405
739.877	97.6999		739.877	95.4974
738.013	97.7673		738.013	95.5719
736.149	97.8389		736.149	95.602
734.286	97.8416		734.286	95.5949
732.422	97.7564		732.422	95.3793
730.558	97.6092		730.558	95.1513
728.695	97.4512		728.695	95.0152
726.831	97.3193		726.831	94.9135
724.967	97.3291		724.967	94.8907
723.104	97.3624		723.104	94.84
721.24	97.1949		721.24	94.6533
719.376	97.117		719.376	94.5227
717.513	97.2456		717.513	94.8255
715.649	97.5362		715.649	95.2282
713.785	97.6504		713.785	95.3997
711.922	97.7132		711.922	95.6328
710.058	97.8315		710.058	95.9379
708.194	97.862		708.194	96.0993
706.331	97.7703		706.331	96.0702
704.467	97.4552		704.467	95.7396
702.603	97.1652		702.603	95.5031
700.74	97.3013		700.74	95.7196
698.876	97.635		698.876	96.0405
697.012	97.8485		697.012	96.1761
695.149	98.0706		695.149	96.3253
693.285	98.0855		693.285	96.4404
691.421	98.0533		691.421	96.3055
689.557	98.1144		689.557	96.0736
687.694	98.1884		687.694	95.9336
685.83	98.2793		685.83	95.9903
683.966	98.3244		683.966	95.9864
682.103	98.2312		682.103	95.9393
680.239	98.2271		680.239	96.018
678.375	98.2603		678.375	96.2888
676.512	98.3969		676.512	96.6006
674.648	98.5628		674.648	96.7515
672.784	98.5996		672.784	96.8174
670.921	98.5186		670.921	96.5664
669.057	98.305		669.057	96.1636
667.193	98.0996		667.193	96.2815
665.33	98.1346		665.33	96.5768
663.466	98.1441		663.466	96.5547
661.602	98.2866		661.602	96.5187
659.739	98.5267		659.739	96.3197
657.875	98.6525		657.875	96.292
656.011	98.5065		656.011	96.55
654.148	98.538		654.148	96.6978
652.284	98.6572		652.284	96.51
650.42	98.6142		650.42	96.334
648.557	98.4417		648.557	96.3842
646.693	98.413		646.693	96.3822
644.829	98.3309		644.829	96.0963
642.966	97.9259		642.966	95.7007
641.102	97.4624		641.102	95.1913
639.238	97.4129		639.238	95.1914
637.375	97.7583		637.375	95.742
635.511	98.0252		635.511	96.0952
633.647	98.3156		633.647	96.231
631.784	98.5468		631.784	96.2552
629.92	98.5941		629.92	96.3218
628.056	98.5321		628.056	96.4339
626.193	98.5575		626.193	96.4495
624.329	98.7604		624.329	96.462
622.465	98.7974		622.465	96.2342
620.602	98.536		620.602	96.103
618.738	98.4505		618.738	96.2853
616.874	98.6163		616.874	96.2514
615.011	98.4688		615.011	96.2911
613.147	98.294		613.147	96.5651
611.283	98.3919		611.283	96.5314
609.42	98.3711		609.42	96.4847
607.556	98.1217		607.556	96.4159
605.692	98.1221		605.692	96.0945
603.829	98.2598		603.829	96.0404
601.965	98.239		601.965	96.075
600.101	98.3609		600.101	96.04
598.238	98.2932		598.238	96.2502
596.374	98.1538		596.374	96.0887
594.51	97.9929		594.51	95.8085
592.647	97.9395		592.647	95.8155
590.783	97.8327		590.783	95.7776
588.919	97.9159		588.919	95.5379
587.056	97.8519		587.056	95.5041
585.192	97.4688		585.192	95.3036
583.328	97.3784		583.328	95.0807
581.465	97.4359		581.465	94.9933
579.601	97.5409		579.601	94.8197
577.737	97.3618		577.737	94.5883
575.874	97.1199		575.874	94.4152
574.01	97.1599		574.01	94.1142
572.146	97.2503		572.146	94.1824
570.283	96.8757		570.283	94.534
568.419	96.6375		568.419	94.7516
566.555	96.7053		566.555	94.8886
564.692	96.7408		564.692	95.2574
562.828	97.1484		562.828	95.1981
560.964	97.2043		560.964	95.0227
559.101	96.6965		559.101	95.0222
557.237	96.3581		557.237	95.009
555.373	96.2457		555.373	94.3136
553.51	95.9377		553.51	93.3477
551.646	95.4981		551.646	92.538
549.782	94.9202		549.782	91.9197
547.919	93.7482		547.919	91.1384
546.055	92.3851		546.055	89.7156
544.191	91.0992		544.191	88.0046
542.328	90.4172		542.328	87.1715
540.464	90.3674		540.464	87.4603
538.6	90.9916		538.6	88.3333
536.737	91.9109		536.737	89.3808
534.873	92.5711		534.873	90.3074
533.009	92.7803		533.009	90.6466
531.146	92.8945		531.146	90.4282
529.282	93.066		529.282	90.1385
527.418	93.391		527.418	90.1624
525.555	93.711		525.555	90.1254
523.691	92.8344		523.691	90.4593
521.827	92.1354		521.827	90.5638
519.964	92.8999		519.964	90.4774
518.1	94.1536		518.1	91.0172
516.236	94.9796		516.236	91.8381
514.373	95.2736		514.373	92.5556
512.509	95.6422		512.509	92.9319
510.645	96.0876		510.645	93.103
508.782	95.9986		508.782	93.1182
506.918	95.7959		506.918	92.9516
505.054	95.6372		505.054	92.976
503.191	95.7543		503.191	93.1353
501.327	95.9256		501.327	93.3153
499.463	95.6035		499.463	92.9636
497.6	95.2998		497.6	92.2705
495.736	95.1181		495.736	92.0528
493.872	94.952		493.872	92.3776
492.009	94.9398		492.009	92.352
490.145	94.8868		490.145	91.8351
488.281	94.6997		488.281	91.9241
486.418	94.7248		486.418	92.3132
484.554	95.0828		484.554	92.3122
482.69	95.8054		482.69	92.4663
480.827	95.7842		480.827	93.0105
478.963	95.468		478.963	93.6562
477.099	95.8258		477.099	93.5369
475.236	96.0518		475.236	93.4742
473.372	95.4734		473.372	93.27
471.508	94.7318		471.508	93.4426
469.645	95.0177		469.645	92.7271
467.781	95.4533		467.781	91.9836
465.917	95.5353		465.917	93.2275
464.054	96.7261		464.054	94.5241
462.19	97.9739		462.19	94.7564
460.326	97.7521		460.326	94.8075
458.463	97.6105		458.463	94.5926
456.599	97.4616		456.599	94.5285
454.735	97.2987		454.735	94.2471
452.872	96.5922		452.872	94.6621
451.008	96.9884		451.008	95.0768
449.144	97.5159		449.144	94.0898
447.281	97.5278		447.281	94.1316
445.417	96.7916		445.417	94.1085
443.553	95.4703		443.553	94.0797
441.69	94.5191		441.69	93.8808
439.826	94.4986		439.826	92.785
437.962	94.9692		437.962	91.4899
436.099	94.8157		436.099	89.597
434.235	91.6435		434.235	86.5933
432.371	88.374		432.371	84.6284
430.508	86.4293		430.508	83.284
428.644	85.5149		428.644	81.7691
426.78	87.2752		426.78	83.418
424.917	89.3184		424.917	87.126
423.053	91.5258		423.053	90.6749
421.189	92.9507		421.189	92.7976
419.326	94.5892		419.326	91.2141
417.462	94.2091		417.462	92.0708
415.598	94.5873		415.598	94.1729
413.734	96.7232		413.734	93.6187
411.871	95.6175		411.871	93.332
410.007	93.2169		410.007	93.217
408.143	94.5235		408.143	91.0971
406.28	98.7186		406.28	90.8821
404.416	98.9881		404.416	94.308
402.552	97.7245		402.552	94.8114
400.689	94.7806		400.689	93.044

## Sheet: juntos (2)
Eter de petroleo			n-Hexano
wavenumber	%Transmittance		wavenumber	%Transmittance
3999.43	99.9126		3999.43	99.3965
3997.57	99.8757		3997.57	99.3976
3995.71	100.008		3995.71	99.4619
3993.84	100.137		3993.84	99.5074
3991.98	100.126		3991.98	99.354
3990.12	100.194		3990.12	99.2571
3988.25	100.135		3988.25	99.3055
3986.39	100.035		3986.39	99.279
3984.52	100.089		3984.52	99.1521
3982.66	100.001		3982.66	99.303
3980.8	99.8719		3980.8	99.536
3978.93	99.8816		3978.93	99.6541
3977.07	99.9104		3977.07	99.6442
3975.21	99.9832		3975.21	99.4224
3973.34	100.033		3973.34	99.4325
3971.48	100.19		3971.48	99.5806
3969.61	100.195		3969.61	99.41
3967.75	100.04		3967.75	99.2377
3965.89	100.116		3965.89	99.193
3964.02	100.021		3964.02	99.2166
3962.16	100.046		3962.16	99.291
3960.3	100.069		3960.3	99.249
3958.43	100.009		3958.43	99.1332
3956.57	100.181		3956.57	99.178
3954.71	100.155		3954.71	99.3451
3952.84	100.007		3952.84	99.3689
3950.98	100.087		3950.98	99.4011
3949.11	100.195		3949.11	99.4631
3947.25	100.137		3947.25	99.3331
3945.39	100.135		3945.39	99.2997
3943.52	100.193		3943.52	99.4537
3941.66	100.097		3941.66	99.502
3939.8	99.9865		3939.8	99.4243
3937.93	100.08		3937.93	99.2272
3936.07	100.143		3936.07	99.1518
3934.21	100.129		3934.21	99.2513
3932.34	100.213		3932.34	99.3854
3930.48	100.271		3930.48	99.4905
3928.61	100.446		3928.61	99.4524
3926.75	100.455		3926.75	99.4207
3924.89	100.139		3924.89	99.4433
3923.02	100.013		3923.02	99.3085
3921.16	100.174		3921.16	99.2194
3919.3	100.227		3919.3	99.3671
3917.43	100.178		3917.43	99.4462
3915.57	100.119		3915.57	99.2725
3913.7	100.092		3913.7	99.2511
3911.84	99.9741		3911.84	99.3923
3909.98	99.9888		3909.98	99.3564
3908.11	100.326		3908.11	99.2201
3906.25	100.287		3906.25	99.2865
3904.39	99.9183		3904.39	99.4659
3902.52	100.114		3902.52	99.5838
3900.66	100.47		3900.66	99.4683
3898.8	100.31		3898.8	99.3388
3896.93	100.018		3896.93	99.4273
3895.07	99.9904		3895.07	99.386
3893.2	99.9962		3893.2	99.3075
3891.34	100.029		3891.34	99.32
3889.48	100.273		3889.48	99.132
3887.61	100.397		3887.61	99.0722
3885.75	100.328		3885.75	99.217
3883.89	100.312		3883.89	99.2848
3882.02	100.078		3882.02	99.3056
3880.16	100.05		3880.16	99.4136
3878.3	100.029		3878.3	99.4195
3876.43	99.8184		3876.43	99.2089
3874.57	99.9586		3874.57	99.2297
3872.7	100.341		3872.7	99.3304
3870.84	100.407		3870.84	99.3576
3868.98	100.257		3868.98	99.3237
3867.11	100.363		3867.11	99.3378
3865.25	100.41		3865.25	99.2853
3863.39	100.158		3863.39	99.3356
3861.52	100.204		3861.52	99.6074
3859.66	100.43		3859.66	99.5875
3857.79	100.372		3857.79	99.4359
3855.93	100.573		3855.93	99.3805
3854.07	100.797		3854.07	99.4614
3852.2	100.307		3852.2	99.4475
3850.34	99.9554		3850.34	99.4626
3848.48	99.9943		3848.48	99.5362
3846.61	100.067		3846.61	99.5137
3844.75	100.129		3844.75	99.378
3842.89	100.253		3842.89	99.2972
3841.02	100.385		3841.02	99.3778
3839.16	100.131		3839.16	99.5308
3837.29	99.8338		3837.29	99.5538
3835.43	99.8079		3835.43	99.5636
3833.57	100.046		3833.57	99.5536
3831.7	100.358		3831.7	99.6719
3829.84	100.337		3829.84	99.6696
3827.98	100.109		3827.98	99.6664
3826.11	100.098		3826.11	99.6735
3824.25	100.233		3824.25	99.4928
3822.38	100.208		3822.38	99.3533
3820.52	100.189		3820.52	99.3693
3818.66	100.302		3818.66	99.3672
3816.79	100.172		3816.79	99.5642
3814.93	100.039		3814.93	99.5565
3813.07	100.072		3813.07	99.3909
3811.2	100.158		3811.2	99.3541
3809.34	100.353		3809.34	99.4217
3807.48	100.356		3807.48	99.6004
3805.61	100.263		3805.61	99.4167
3803.75	100.314		3803.75	99.2109
3801.88	100.32		3801.88	99.6615
3800.02	100.38		3800.02	99.7161
3798.16	100.453		3798.16	99.458
3796.29	100.476		3796.29	99.4236
3794.43	100.275		3794.43	99.4355
3792.57	99.9228		3792.57	99.3875
3790.7	99.8703		3790.7	99.3856
3788.84	99.9469		3788.84	99.4191
3786.98	99.9757		3786.98	99.492
3785.11	99.8548		3785.11	99.6153
3783.25	100.067		3783.25	99.5419
3781.38	100.326		3781.38	99.3929
3779.52	100.142		3779.52	99.4692
3777.66	99.9837		3777.66	99.5196
3775.79	100.104		3775.79	99.4559
3773.93	100.25		3773.93	99.363
3772.07	100.406		3772.07	99.2772
3770.2	100.515		3770.2	99.2557
3768.34	100.315		3768.34	99.313
3766.47	100.163		3766.47	99.4589
3764.61	100.143		3764.61	99.4631
3762.75	100.024		3762.75	99.5059
3760.88	99.953		3760.88	99.7651
3759.02	100.197		3759.02	99.7011
3757.16	100.459		3757.16	99.4939
3755.29	100.376		3755.29	99.3629
3753.43	100.14		3753.43	99.3961
3751.57	100.215		3751.57	99.7259
3749.7	100.475		3749.7	99.7945
3747.84	100.623		3747.84	99.4658
3745.97	100.565		3745.97	99.5765
3744.11	100.084		3744.11	99.6871
3742.25	99.9938		3742.25	99.7282
3740.38	100.337		3740.38	99.6896
3738.52	100.598		3738.52	99.3827
3736.66	100.902		3736.66	99.6018
3734.79	100.944		3734.79	99.8306
3732.93	100.211		3732.93	99.7452
3731.07	99.9243		3731.07	99.6165
3729.2	100.165		3729.2	99.4687
3727.34	100.196		3727.34	99.4612
3725.47	100.273		3725.47	99.4646
3723.61	100.424		3723.61	99.3234
3721.75	100.482		3721.75	99.2609
3719.88	100.478		3719.88	99.5781
3718.02	100.262		3718.02	99.6921
3716.16	99.9477		3716.16	99.4026
3714.29	100.196		3714.29	99.3537
3712.43	100.608		3712.43	99.563
3710.56	100.543		3710.56	99.5734
3708.7	100.507		3708.7	99.488
3706.84	100.401		3706.84	99.5973
3704.97	100.372		3704.97	99.7349
3703.11	100.177		3703.11	99.7436
3701.25	99.8243		3701.25	99.6161
3699.38	99.9882		3699.38	99.4631
3697.52	100.28		3697.52	99.4296
3695.66	100.289		3695.66	99.4638
3693.79	100.413		3693.79	99.5644
3691.93	100.616		3691.93	99.5586
3690.06	100.582		3690.06	99.6575
3688.2	100.579		3688.2	99.6779
3686.34	100.584		3686.34	99.5856
3684.47	100.279		3684.47	99.5735
3682.61	100.041		3682.61	99.5245
3680.75	100.087		3680.75	99.6525
3678.88	100.464		3678.88	99.6074
3677.02	100.554		3677.02	99.502
3675.16	100.438		3675.16	99.7081
3673.29	100.68		3673.29	99.6023
3671.43	100.575		3671.43	99.3338
3669.56	100.04		3669.56	99.2775
3667.7	99.9671		3667.7	99.2593
3665.84	100.155		3665.84	99.2756
3663.97	100.148		3663.97	99.3671
3662.11	100.179		3662.11	99.402
3660.25	100.367		3660.25	99.51
3658.38	100.273		3658.38	99.6022
3656.52	100.216		3656.52	99.6178
3654.65	100.437		3654.65	99.3596
3652.79	100.556		3652.79	99.2223
3650.93	100.294		3650.93	99.3452
3649.06	100.045		3649.06	99.4013
3647.2	100.267		3647.2	99.5949
3645.34	100.183		3645.34	99.736
3643.47	99.8119		3643.47	99.7295
3641.61	99.939		3641.61	99.6017
3639.75	100.2		3639.75	99.4142
3637.88	100.163		3637.88	99.2206
3636.02	100.194		3636.02	99.2246
3634.15	100.292		3634.15	99.3887
3632.29	100.499		3632.29	99.3092
3630.43	100.559		3630.43	99.2794
3628.56	100.154		3628.56	99.4939
3626.7	99.9962		3626.7	99.6127
3624.84	100.125		3624.84	99.4791
3622.97	100.359		3622.97	99.2842
3621.11	100.283		3621.11	99.1269
3619.25	99.8928		3619.25	99.1851
3617.38	100.037		3617.38	99.4155
3615.52	100.312		3615.52	99.3802
3613.65	100.186		3613.65	99.2547
3611.79	100.137		3611.79	99.2963
3609.93	100.07		3609.93	99.3646
3608.06	100.028		3608.06	99.228
3606.2	100.135		3606.2	99.2325
3604.34	100.136		3604.34	99.542
3602.47	99.9558		3602.47	99.6076
3600.61	99.9362		3600.61	99.4407
3598.74	100.144		3598.74	99.3579
3596.88	100.33		3596.88	99.1818
3595.02	100.229		3595.02	99.011
3593.15	99.9099		3593.15	99.0347
3591.29	99.964		3591.29	99.0479
3589.43	100.208		3589.43	99.1519
3587.56	100.133		3587.56	99.264
3585.7	100		3585.7	99.4428
3583.84	99.8628		3583.84	99.5709
3581.97	99.7664		3581.97	99.3051
3580.11	99.7694		3580.11	99.0601
3578.24	99.8802		3578.24	99.2194
3576.38	100.041		3576.38	99.4239
3574.52	99.8164		3574.52	99.3833
3572.65	99.7366		3572.65	99.0155
3570.79	100.006		3570.79	98.5806
3568.93	100.142		3568.93	98.7154
3567.06	99.9261		3567.06	98.999
3565.2	99.8074		3565.2	98.9123
3563.33	99.9542		3563.33	98.9949
3561.47	100.148		3561.47	99.0632
3559.61	100.094		3559.61	98.8679
3557.74	99.8926		3557.74	98.6495
3555.88	99.6766		3555.88	98.7694
3554.02	99.6659		3554.02	98.9189
3552.15	99.8954		3552.15	99.0301
3550.29	99.8914		3550.29	99.2761
3548.43	99.7921		3548.43	99.0868
3546.56	99.8019		3546.56	98.6844
3544.7	99.9546		3544.7	98.6703
3542.83	100.137		3542.83	98.8624
3540.97	99.8426		3540.97	99.0822
3539.11	99.7143		3539.11	99.021
3537.24	99.742		3537.24	98.7625
3535.38	99.7061		3535.38	98.6958
3533.52	99.863		3533.52	98.8947
3531.65	99.9287		3531.65	99.0553
3529.79	99.8092		3529.79	99.0047
3527.93	100.09		3527.93	98.9164
3526.06	100.602		3526.06	98.8787
3524.2	100.209		3524.2	98.942
3522.33	99.6252		3522.33	98.9883
3520.47	99.6654		3520.47	99.0903
3518.61	99.8192		3518.61	99.0212
3516.74	99.8899		3516.74	98.824
3514.88	99.8683		3514.88	98.7208
3513.02	99.8466		3513.02	98.6335
3511.15	99.8976		3511.15	98.8937
3509.29	99.8581		3509.29	99.2803
3507.42	99.9931		3507.42	99.1621
3505.56	100.187		3505.56	98.8893
3503.7	100.161		3503.7	98.8814
3501.83	99.8355		3501.83	98.7945
3499.97	99.6077		3499.97	98.7824
3498.11	99.613		3498.11	98.753
3496.24	99.7224		3496.24	98.609
3494.38	99.8047		3494.38	98.6405
3492.52	99.6762		3492.52	98.8704
3490.65	99.7558		3490.65	98.8317
3488.79	99.9425		3488.79	98.6917
3486.92	99.9825		3486.92	98.67
3485.06	99.8374		3485.06	98.6678
3483.2	99.8107		3483.2	98.824
3481.33	100.074		3481.33	98.8086
3479.47	99.9676		3479.47	98.5591
3477.61	99.7084		3477.61	98.7686
3475.74	99.544		3475.74	99.2561
3473.88	99.8321		3473.88	99.3086
3472.02	100.26		3472.02	98.9026
3470.15	99.9173		3470.15	98.636
3468.29	99.653		3468.29	98.726
3466.42	99.8437		3466.42	98.7214
3464.56	99.6459		3464.56	98.486
3462.7	99.4912		3462.7	98.5021
3460.83	99.6507		3460.83	98.589
3458.97	99.6957		3458.97	98.7053
3457.11	99.6464		3457.11	98.8147
3455.24	99.6749		3455.24	98.7538
3453.38	99.7788		3453.38	98.5521
3451.51	99.7277		3451.51	98.4936
3449.65	99.6171		3449.65	98.5851
3447.79	99.7494		3447.79	98.6373
3445.92	99.7956		3445.92	98.7992
3444.06	99.5279		3444.06	99.2113
3442.2	99.4631		3442.2	99.1584
3440.33	99.4783		3440.33	98.831
3438.47	99.385		3438.47	98.7473
3436.61	99.4494		3436.61	98.6891
3434.74	99.6212		3434.74	98.6121
3432.88	99.7548		3432.88	98.5935
3431.01	99.7658		3431.01	98.8664
3429.15	99.6804		3429.15	99.1252
3427.29	99.6876		3427.29	98.9274
3425.42	99.7649		3425.42	98.6302
3423.56	99.7229		3423.56	98.7626
3421.7	99.4826		3421.7	98.8914
3419.83	99.3506		3419.83	98.7295
3417.97	99.5505		3417.97	98.5206
3416.11	99.7553		3416.11	98.4878
3414.24	99.6694		3414.24	98.6724
3412.38	99.5758		3412.38	98.6954
3410.51	99.6108		3410.51	98.5573
3408.65	99.7878		3408.65	98.6428
3406.79	99.9941		3406.79	98.839
3404.92	99.963		3404.92	98.7976
3403.06	99.5789		3403.06	98.8339
3401.2	99.3229		3401.2	98.8483
3399.33	99.3405		3399.33	98.6462
3397.47	99.3818		3397.47	98.7716
3395.6	99.3968		3395.6	99.1243
3393.74	99.3614		3393.74	99.1289
3391.88	99.585		3391.88	98.9671
3390.01	99.8978		3390.01	98.8357
3388.15	99.7961		3388.15	98.8686
3386.29	99.5348		3386.29	98.8823
3384.42	99.4531		3384.42	98.7967
3382.56	99.5729		3382.56	98.8219
3380.7	99.6159		3380.7	98.7351
3378.83	99.2872		3378.83	98.6214
3376.97	99.2984		3376.97	98.5322
3375.1	99.5951		3375.1	98.5051
3373.24	99.5956		3373.24	98.5811
3371.38	99.6857		3371.38	98.586
3369.51	99.6938		3369.51	98.6873
3367.65	99.6999		3367.65	98.8584
3365.79	99.7198		3365.79	98.9487
3363.92	99.6372		3363.92	98.9716
3362.06	99.7019		3362.06	98.8403
3360.2	99.8149		3360.2	98.7017
3358.33	99.7479		3358.33	98.6565
3356.47	99.4653		3356.47	98.599
3354.6	99.2742		3354.6	98.69
3352.74	99.4223		3352.74	98.8561
3350.88	99.8748		3350.88	98.799
3349.01	100.098		3349.01	98.7009
3347.15	99.7317		3347.15	98.8958
3345.29	99.5785		3345.29	98.8816
3343.42	99.617		3343.42	98.6534
3341.56	99.4779		3341.56	98.6532
3339.69	99.5018		3339.69	98.8909
3337.83	99.5975		3337.83	98.9991
3335.97	99.5129		3335.97	98.8527
3334.1	99.4702		3334.1	98.7292
3332.24	99.7002		3332.24	98.5742
3330.38	99.6399		3330.38	98.4474
3328.51	99.4953		3328.51	98.4845
3326.65	99.6166		3326.65	98.6757
3324.79	99.7763		3324.79	98.8947
3322.92	99.9259		3322.92	98.9003
3321.06	99.8994		3321.06	98.9141
3319.19	99.6395		3319.19	98.8774
3317.33	99.5668		3317.33	98.8551
3315.47	99.5816		3315.47	98.9521
3313.6	99.5224		3313.6	98.9503
3311.74	99.5367		3311.74	98.8442
3309.88	99.5622		3309.88	98.7352
3308.01	99.4592		3308.01	98.7204
3306.15	99.392		3306.15	98.7819
3304.28	99.4276		3304.28	98.9088
3302.42	99.5118		3302.42	98.9685
3300.56	99.6456		3300.56	98.9311
3298.69	99.6244		3298.69	98.9235
3296.83	99.5689		3296.83	98.744
3294.97	99.6504		3294.97	98.7974
3293.1	99.6867		3293.1	99.0195
3291.24	99.4487		3291.24	98.797
3289.38	99.3427		3289.38	98.5482
3287.51	99.4932		3287.51	98.5965
3285.65	99.5248		3285.65	98.7001
3283.78	99.5618		3283.78	98.5983
3281.92	99.8107		3281.92	98.7148
3280.06	99.7876		3280.06	98.9807
3278.19	99.3928		3278.19	98.9328
3276.33	99.2782		3276.33	98.9756
3274.47	99.559		3274.47	98.9615
3272.6	99.6332		3272.6	98.8914
3270.74	99.5338		3270.74	98.9023
3268.88	99.693		3268.88	98.8396
3267.01	99.7867		3267.01	98.8642
3265.15	99.5912		3265.15	98.955
3263.28	99.5721		3263.28	98.959
3261.42	99.749		3261.42	98.8796
3259.56	99.7074		3259.56	98.738
3257.69	99.6509		3257.69	98.6595
3255.83	99.7602		3255.83	98.8803
3253.97	99.7317		3253.97	99.0433
3252.1	99.5978		3252.1	99.0158
3250.24	99.4007		3250.24	99.0593
3248.37	99.2143		3248.37	99.0476
3246.51	99.3196		3246.51	98.9147
3244.65	99.5882		3244.65	98.9248
3242.78	99.8644		3242.78	98.8911
3240.92	99.9877		3240.92	98.7429
3239.06	99.6763		3239.06	98.7421
3237.19	99.3397		3237.19	98.729
3235.33	99.3519		3235.33	98.8304
3233.47	99.4743		3233.47	99.1284
3231.6	99.5464		3231.6	99.2033
3229.74	99.5609		3229.74	98.9459
3227.87	99.6163		3227.87	98.8487
3226.01	99.6965		3226.01	99.1794
3224.15	99.6787		3224.15	99.1105
3222.28	99.6001		3222.28	98.7485
3220.42	99.6098		3220.42	98.6798
3218.56	99.6413		3218.56	98.7228
3216.69	99.6522		3216.69	98.8306
3214.83	99.7107		3214.83	99.0216
3212.97	99.6674		3212.97	98.9449
3211.1	99.6259		3211.1	98.7127
3209.24	99.7079		3209.24	98.7298
3207.37	99.6727		3207.37	98.8146
3205.51	99.6271		3205.51	98.7086
3203.65	99.6798		3203.65	98.6361
3201.78	99.6305		3201.78	98.8076
3199.92	99.4123		3199.92	99.0452
3198.06	99.2557		3198.06	99.0834
3196.19	99.3703		3196.19	98.9082
3194.33	99.5013		3194.33	98.7535
3192.46	99.5207		3192.46	98.8873
3190.6	99.5642		3190.6	99.0548
3188.74	99.6503		3188.74	98.9213
3186.87	99.6457		3186.87	98.6787
3185.01	99.6793		3185.01	98.7639
3183.15	99.7436		3183.15	98.9078
3181.28	99.6209		3181.28	98.8123
3179.42	99.5214		3179.42	98.7542
3177.56	99.6188		3177.56	98.9007
3175.69	99.6045		3175.69	98.9266
3173.83	99.4784		3173.83	98.8523
3171.96	99.4058		3171.96	98.9212
3170.1	99.3814		3170.1	99.0153
3168.24	99.4055		3168.24	98.9356
3166.37	99.4895		3166.37	98.936
3164.51	99.5615		3164.51	99.0102
3162.65	99.4925		3162.65	98.9893
3160.78	99.3244		3160.78	99.0621
3158.92	99.2018		3158.92	99.1119
3157.06	99.3009		3157.06	99.0325
3155.19	99.6064		3155.19	98.8423
3153.33	99.6907		3153.33	98.7655
3151.46	99.5166		3151.46	98.8922
3149.6	99.5438		3149.6	98.8706
3147.74	99.5552		3147.74	98.59
3145.87	99.4363		3145.87	98.4775
3144.01	99.5257		3144.01	98.7501
3142.15	99.5033		3142.15	99.0302
3140.28	99.2897		3140.28	98.9923
3138.42	99.3278		3138.42	98.8182
3136.55	99.4568		3136.55	98.8893
3134.69	99.4744		3134.69	98.9546
3132.83	99.427		3132.83	98.9211
3130.96	99.2352		3130.96	98.9549
3129.1	99.1542		3129.1	98.754
3127.24	99.286		3127.24	98.5809
3125.37	99.2823		3125.37	98.6658
3123.51	99.2433		3123.51	98.7826
3121.65	99.3674		3121.65	98.7179
3119.78	99.4145		3119.78	98.6688
3117.92	99.355		3117.92	98.6605
3116.05	99.1978		3116.05	98.6727
3114.19	99.012		3114.19	98.8162
3112.33	98.9703		3112.33	98.6579
3110.46	98.9598		3110.46	98.5776
3108.6	99.104		3108.6	98.8015
3106.74	99.2545		3106.74	98.7705
3104.87	99.1517		3104.87	98.5516
3103.01	99.0621		3103.01	98.4373
3101.15	99.0831		3101.15	98.2912
3099.28	99.1794		3099.28	98.2024
3097.42	99.1849		3097.42	98.3379
3095.55	98.8669		3095.55	98.1294
3093.69	98.4523		3093.69	97.8614
3091.83	98.169		3091.83	97.6789
3089.96	97.751		3089.96	97.3277
3088.1	97.1714		3088.1	96.8738
3086.24	96.9176		3086.24	96.6432
3084.37	96.7775		3084.37	96.5866
3082.51	96.5821		3082.51	96.5264
3080.64	96.6788		3080.64	96.522
3078.78	96.8424		3078.78	96.5505
3076.92	96.7944		3076.92	96.5505
3075.05	96.7569		3075.05	96.4637
3073.19	96.8747		3073.19	96.3971
3071.33	96.9429		3071.33	96.501
3069.46	97.0167		3069.46	96.6181
3067.6	97.2712		3067.6	96.6252
3065.74	97.4583		3065.74	96.8635
3063.87	97.6018		3063.87	97.1447
3062.01	97.867		3062.01	97.139
3060.14	97.8695		3060.14	97.2533
3058.28	97.7313		3058.28	97.4493
3056.42	97.8799		3056.42	97.4583
3054.55	98.0419		3054.55	97.484
3052.69	97.9551		3052.69	97.371
3050.83	97.8691		3050.83	97.3236
3048.96	97.837		3048.96	97.3043
3047.1	97.7673		3047.1	97.1893
3045.24	97.7603		3045.24	97.1154
3043.37	97.812		3043.37	97.1216
3041.51	97.8578		3041.51	97.2604
3039.64	97.7526		3039.64	97.3725
3037.78	97.6674		3037.78	97.2947
3035.92	97.7064		3035.92	97.1795
3034.05	97.8129		3034.05	97.2426
3032.19	97.8139		3032.19	97.1579
3030.33	97.6358		3030.33	96.9364
3028.46	97.4813		3028.46	96.8445
3026.6	97.3041		3026.6	96.5719
3024.73	97.0262		3024.73	96.1114
3022.87	96.6179		3022.87	95.8526
3021.01	96.1069		3021.01	95.5311
3019.14	95.7507		3019.14	95.1154
3017.28	95.4961		3017.28	94.7594
3015.42	95.1366		3015.42	94.5138
3013.55	94.8872		3013.55	94.3807
3011.69	94.8077		3011.69	94.2646
3009.83	94.738		3009.83	94.1258
3007.96	94.6683		3007.96	94.0442
3006.1	94.7123		3006.1	94.1059
3004.23	94.9563		3004.23	94.2922
3002.37	95.1709		3002.37	94.4803
3000.51	95.3069		3000.51	94.5177
2998.64	95.4853		2998.64	94.515
2996.78	95.5111		2996.78	94.5589
2994.92	95.332		2994.92	94.4808
2993.05	95.0932		2993.05	94.2494
2991.19	94.7758		2991.19	93.9964
2989.32	94.4424		2989.32	93.784
2987.46	94.1359		2987.46	93.4337
2985.6	93.7656		2985.6	93.01
2983.73	93.3521		2983.73	92.5891
2981.87	92.9507		2981.87	92.0883
2980.01	92.3767		2980.01	91.4479
2978.14	91.4856		2978.14	90.7068
2976.28	90.5494		2976.28	89.8587
2974.42	89.4929		2974.42	88.7885
2972.55	88.0115		2972.55	87.3279
2970.69	86.1041		2970.69	85.4686
2968.82	83.9717		2968.82	83.5044
2966.96	81.939		2966.96	81.7777
2965.1	80.4282		2965.1	80.329
2963.23	79.7439		2963.23	79.5106
2961.37	79.686		2961.37	79.5363
2959.51	80.1409		2959.51	79.9887
2957.64	81.0023		2957.64	80.7286
2955.78	81.9932		2955.78	81.6404
2953.92	83.2044		2953.92	82.6687
2952.05	84.4646		2952.05	83.7061
2950.19	85.4225		2950.19	84.4736
2948.32	85.8217		2948.32	84.8658
2946.46	85.6807		2946.46	84.7612
2944.6	85.3297		2944.6	84.3014
2942.73	84.6788		2942.73	83.4216
2940.87	83.692		2940.87	82.3245
2939.01	82.5774		2939.01	81.2342
2937.14	81.3817		2937.14	80.0874
2935.28	80.2005		2935.28	78.7383
2933.41	78.9501		2933.41	77.2565
2931.55	77.6973		2931.55	75.9147
2929.69	76.6726		2929.69	74.7396
2927.82	75.6442		2927.82	73.6958
2925.96	74.6993		2925.96	72.759
2924.1	74.0724		2924.1	72.0207
2922.23	73.5765		2922.23	71.585
2920.37	73.3031		2920.37	71.3206
2918.51	73.3226		2918.51	71.2701
2916.64	73.5215		2916.64	71.5519
2914.78	73.9516		2914.78	72.1172
2912.91	74.5641		2912.91	72.8372
2911.05	75.2649		2911.05	73.7253
2909.19	75.9965		2909.19	74.5673
2907.32	76.7833		2907.32	75.4172
2905.46	77.5199		2905.46	76.1419
2903.6	78.0015		2903.6	76.8189
2901.73	78.4428		2901.73	77.639
2899.87	78.9956		2899.87	78.3109
2898.01	79.5573		2898.01	78.7184
2896.14	79.9971		2896.14	79.1131
2894.28	80.1709		2894.28	79.3749
2892.41	80.2275		2892.41	79.4293
2890.55	80.266		2890.55	79.4713
2888.69	80.288		2888.69	79.6014
2886.82	80.4234		2886.82	79.8287
2884.96	80.6376		2884.96	80.1139
2883.1	80.8269		2883.1	80.2462
2881.23	80.9246		2881.23	80.3456
2879.37	80.9323		2879.37	80.3209
2877.5	80.8366		2877.5	80.1402
2875.64	80.6457		2875.64	79.9122
2873.78	80.6492		2873.78	79.8991
2871.91	81.0113		2871.91	80.1339
2870.05	81.679		2870.05	80.7137
2868.19	82.4506		2868.19	81.4297
2866.32	82.9225		2866.32	81.9517
2864.46	83.1492		2864.46	82.2275
2862.6	83.3097		2862.6	82.2487
2860.73	82.9204		2860.73	81.785
2858.87	82.1271		2858.87	80.9622
2857	81.5834		2857	80.2091
2855.14	81.5488		2855.14	79.7969
2853.28	81.8728		2853.28	79.762
2851.41	82.3974		2851.41	80.0589
2849.55	83.1871		2849.55	80.6755
2847.69	84.0154		2847.69	81.6835
2845.82	84.6773		2845.82	82.6674
2843.96	85.0819		2843.96	83.2413
2842.1	85.101		2842.1	83.5906
2840.23	84.9912		2840.23	83.6824
2838.37	84.8668		2838.37	83.6219
2836.5	84.7578		2836.5	83.6697
2834.64	84.7794		2834.64	83.7212
2832.78	84.9595		2832.78	84.0193
2830.91	85.6165		2830.91	84.7197
2829.05	86.6539		2829.05	85.7249
2827.19	87.8149		2827.19	86.9056
2825.32	88.9718		2825.32	87.9117
2823.46	89.7971		2823.46	88.5725
2821.59	90.2329		2821.59	89.1672
2819.73	90.5341		2819.73	89.588
2817.87	91.083		2817.87	89.9075
2816	91.725		2816	90.5319
2814.14	92.3032		2814.14	91.2888
2812.28	93.0199		2812.28	91.9264
2810.41	93.6968		2810.41	92.5813
2808.55	94.2412		2808.55	93.2517
2806.69	94.9021		2806.69	93.8978
2804.82	95.5522		2804.82	94.5144
2802.96	95.9892		2802.96	95.0137
2801.09	96.3056		2801.09	95.4383
2799.23	96.6475		2799.23	95.7769
2797.37	97.0484		2797.37	96.0822
2795.5	97.34		2795.5	96.3523
2793.64	97.5371		2793.64	96.6026
2791.78	97.6682		2791.78	96.7888
2789.91	97.7976		2789.91	96.9425
2788.05	97.9122		2788.05	97.1262
2786.19	97.9671		2786.19	97.2279
2784.32	98.0719		2784.32	97.3211
2782.46	98.1941		2782.46	97.4686
2780.59	98.2563		2780.59	97.5636
2778.73	98.2237		2778.73	97.5798
2776.87	98.3766		2776.87	97.6926
2775	98.631		2775	97.7336
2773.14	98.6495		2773.14	97.7436
2771.28	98.5844		2771.28	97.7567
2769.41	98.5497		2769.41	97.727
2767.55	98.5759		2767.55	97.7482
2765.68	98.6256		2765.68	97.7764
2763.82	98.5666		2763.82	97.7659
2761.96	98.5647		2761.96	97.794
2760.09	98.6658		2760.09	97.7951
2758.23	98.6805		2758.23	97.7807
2756.37	98.572		2756.37	97.8179
2754.5	98.5348		2754.5	97.9072
2752.64	98.6113		2752.64	97.9869
2750.78	98.6278		2750.78	97.9954
2748.91	98.5902		2748.91	97.891
2747.05	98.5669		2747.05	97.8799
2745.18	98.5437		2745.18	97.9269
2743.32	98.4976		2743.32	97.8657
2741.46	98.5603		2741.46	97.8959
2739.59	98.6355		2739.59	97.9693
2737.73	98.544		2737.73	98.001
2735.87	98.4329		2735.87	97.8427
2734	98.4465		2734	97.6585
2732.14	98.4511		2732.14	97.6537
2730.27	98.2657		2730.27	97.5489
2728.41	98.0776		2728.41	97.3968
2726.55	97.9917		2726.55	97.2841
2724.68	97.9479		2724.68	97.2817
2722.82	98.0022		2722.82	97.3862
2720.96	98.1585		2720.96	97.5178
2719.09	98.3725		2719.09	97.6742
2717.23	98.549		2717.23	97.8149
2715.37	98.6457		2715.37	97.8666
2713.5	98.7217		2713.5	97.9045
2711.64	98.8111		2711.64	97.9459
2709.77	98.8323		2709.77	98.0853
2707.91	98.9022		2707.91	98.1959
2706.05	98.9972		2706.05	98.2341
2704.18	98.9747		2704.18	98.244
2702.32	98.9639		2702.32	98.1797
2700.46	98.9976		2700.46	98.1632
2698.59	99.0587		2698.59	98.2693
2696.73	99.1389		2696.73	98.351
2694.87	99.1596		2694.87	98.32
2693	99.1158		2693	98.2809
2691.14	99.1039		2691.14	98.3623
2689.27	99.1576		2689.27	98.5184
2687.41	99.2244		2687.41	98.4867
2685.55	99.2497		2685.55	98.4327
2683.68	99.2499		2683.68	98.5385
2681.82	99.1701		2681.82	98.5857
2679.96	99.1012		2679.96	98.4884
2678.09	99.1059		2678.09	98.4097
2676.23	99.0843		2676.23	98.3659
2674.36	99.0576		2674.36	98.3882
2672.5	99.0711		2672.5	98.4031
2670.64	99.0546		2670.64	98.3831
2668.77	99.0483		2668.77	98.4456
2666.91	99.0475		2666.91	98.4706
2665.05	98.996		2665.05	98.4013
2663.18	99.0262		2663.18	98.3634
2661.32	99.0717		2661.32	98.3763
2659.46	99.008		2659.46	98.4619
2657.59	99.0186		2657.59	98.5279
2655.73	99.161		2655.73	98.4391
2653.86	99.1829		2653.86	98.4084
2652	99.1436		2652	98.4574
2650.14	99.1522		2650.14	98.5181
2648.27	99.2125		2648.27	98.5478
2646.41	99.3375		2646.41	98.6189
2644.55	99.3461		2644.55	98.7113
2642.68	99.2653		2642.68	98.6838
2640.82	99.2819		2640.82	98.6092
2638.96	99.2899		2638.96	98.5431
2637.09	99.239		2637.09	98.542
2635.23	99.2632		2635.23	98.5859
2633.36	99.3402		2633.36	98.6503
2631.5	99.3842		2631.5	98.7587
2629.64	99.4071		2629.64	98.8029
2627.77	99.4235		2627.77	98.6704
2625.91	99.3668		2625.91	98.5415
2624.05	99.2477		2624.05	98.6351
2622.18	99.189		2622.18	98.7462
2620.32	99.2257		2620.32	98.7608
2618.45	99.2531		2618.45	98.6481
2616.59	99.2122		2616.59	98.6891
2614.73	99.2348		2614.73	98.7452
2612.86	99.2918		2612.86	98.5745
2611	99.2122		2611	98.3731
2609.14	99.1015		2609.14	98.5384
2607.27	99.1824		2607.27	98.8073
2605.41	99.3384		2605.41	98.8143
2603.55	99.3853		2603.55	98.7649
2601.68	99.3176		2601.68	98.7058
2599.82	99.2556		2599.82	98.5957
2597.95	99.3354		2597.95	98.5758
2596.09	99.3871		2596.09	98.5653
2594.23	99.2946		2594.23	98.5425
2592.36	99.2714		2592.36	98.5241
2590.5	99.2558		2590.5	98.5874
2588.64	99.1874		2588.64	98.8225
2586.77	99.1961		2586.77	98.9114
2584.91	99.3074		2584.91	98.8284
2583.05	99.4257		2583.05	98.7375
2581.18	99.4738		2581.18	98.6456
2579.32	99.4017		2579.32	98.6789
2577.45	99.2975		2577.45	98.6735
2575.59	99.2395		2575.59	98.7136
2573.73	99.2342		2573.73	98.811
2571.86	99.3084		2571.86	98.808
2570	99.3969		2570	98.759
2568.14	99.4427		2568.14	98.7265
2566.27	99.371		2566.27	98.6016
2564.41	99.1026		2564.41	98.5995
2562.54	99.0594		2562.54	98.6262
2560.68	99.4048		2560.68	98.6535
2558.82	99.3726		2558.82	98.7416
2556.95	99.0631		2556.95	98.7978
2555.09	99.1281		2555.09	98.7552
2553.23	99.3732		2553.23	98.8525
2551.36	99.5361		2551.36	98.929
2549.5	99.5978		2549.5	98.8909
2547.64	99.4397		2547.64	98.9495
2545.77	99.2116		2545.77	99.0553
2543.91	99.3855		2543.91	98.9121
2542.04	99.6533		2542.04	98.8472
2540.18	99.5152		2540.18	98.9412
2538.32	99.3672		2538.32	98.9275
2536.45	99.3585		2536.45	98.8346
2534.59	99.339		2534.59	98.8923
2532.73	99.6137		2532.73	98.8834
2530.86	99.8018		2530.86	98.9281
2529	99.601		2529	98.9227
2527.14	99.4702		2527.14	98.9266
2525.27	99.4468		2525.27	98.9608
2523.41	99.4188		2523.41	98.9494
2521.54	99.4919		2521.54	98.9761
2519.68	99.4683		2519.68	99.1119
2517.82	99.4509		2517.82	99.0811
2515.95	99.5061		2515.95	98.9519
2514.09	99.5468		2514.09	98.9851
2512.23	99.6131		2512.23	99.0947
2510.36	99.572		2510.36	98.9911
2508.5	99.513		2508.5	98.929
2506.63	99.5395		2506.63	99.0312
2504.77	99.4782		2504.77	99.0779
2502.91	99.3314		2502.91	99.1547
2501.04	99.3107		2501.04	99.2735
2499.18	99.5392		2499.18	99.2075
2497.32	99.5992		2497.32	98.9871
2495.45	99.4994		2495.45	98.9552
2493.59	99.5297		2493.59	99.034
2491.73	99.6193		2491.73	99.1195
2489.86	99.5901		2489.86	98.9933
2488	99.4325		2488	98.7877
2486.13	99.3407		2486.13	98.8987
2484.27	99.4031		2484.27	99.1718
2482.41	99.5172		2482.41	99.1344
2480.54	99.5732		2480.54	99.1088
2478.68	99.5434		2478.68	99.289
2476.82	99.4408		2476.82	99.1111
2474.95	99.4295		2474.95	98.9366
2473.09	99.4622		2473.09	99.0888
2471.22	99.3137		2471.22	99.1427
2469.36	99.3219		2469.36	99.0724
2467.5	99.4909		2467.5	99.1471
2465.63	99.4411		2465.63	99.2257
2463.77	99.3864		2463.77	99.1971
2461.91	99.6071		2461.91	99.0986
2460.04	99.624		2460.04	98.9703
2458.18	99.4721		2458.18	98.9908
2456.32	99.4052		2456.32	99.1101
2454.45	99.3165		2454.45	99.1274
2452.59	99.4666		2452.59	99.0877
2450.72	99.6505		2450.72	99.0876
2448.86	99.6473		2448.86	99.1185
2447	99.4663		2447	99.1137
2445.13	99.4392		2445.13	98.9475
2443.27	99.5911		2443.27	98.9675
2441.41	99.5828		2441.41	99.1797
2439.54	99.5985		2439.54	99.2845
2437.68	99.7953		2437.68	99.1649
2435.82	99.719		2435.82	99.1014
2433.95	99.5791		2433.95	99.1611
2432.09	99.5778		2432.09	99.0841
2430.22	99.5837		2430.22	99.0946
2428.36	99.614		2428.36	99.2986
2426.5	99.5379		2426.5	99.3077
2424.63	99.579		2424.63	99.262
2422.77	99.6751		2422.77	99.1758
2420.91	99.6213		2420.91	99.2332
2419.04	99.5802		2419.04	99.3726
2417.18	99.6794		2417.18	99.2004
2415.31	99.6422		2415.31	99.1533
2413.45	99.5135		2413.45	99.2693
2411.59	99.6196		2411.59	99.2617
2409.72	99.7845		2409.72	99.0593
2407.86	99.6755		2407.86	99.0076
2406	99.4927		2406	99.0897
2404.13	99.557		2404.13	99.116
2402.27	99.6339		2402.27	99.1566
2400.41	99.5477		2400.41	99.2213
2398.54	99.5044		2398.54	99.2605
2396.68	99.5968		2396.68	99.2941
2394.81	99.6898		2394.81	99.3238
2392.95	99.6765		2392.95	99.2683
2391.09	99.6086		2391.09	99.1701
2389.22	99.513		2389.22	99.186
2387.36	99.6515		2387.36	99.2014
2385.5	99.7933		2385.5	99.1371
2383.63	99.6267		2383.63	99.1646
2381.77	99.5282		2381.77	99.1845
2379.91	99.6153		2379.91	99.0362
2378.04	99.6989		2378.04	98.9327
2376.18	99.8125		2376.18	98.9208
2374.31	99.7493		2374.31	98.9041
2372.45	99.5721		2372.45	98.8865
2370.59	99.5621		2370.59	98.8297
2368.72	99.6031		2368.72	98.7458
2366.86	99.5397		2366.86	98.7637
2365	99.3958		2365	98.7661
2363.13	99.371		2363.13	98.6617
2361.27	99.4768		2361.27	98.6808
2359.4	99.5277		2359.4	98.7308
2357.54	99.7257		2357.54	98.7617
2355.68	99.6987		2355.68	98.707
2353.81	99.5881		2353.81	98.7702
2351.95	99.5661		2351.95	99.0665
2350.09	99.4759		2350.09	99.1971
2348.22	99.5005		2348.22	99.026
2346.36	99.6085		2346.36	98.8407
2344.5	99.6732		2344.5	98.8788
2342.63	99.6634		2342.63	98.8995
2340.77	99.5767		2340.77	98.855
2338.9	99.6332		2338.9	98.8414
2337.04	99.7338		2337.04	98.8495
2335.18	99.6729		2335.18	98.8944
2333.31	99.6355		2333.31	99.0007
2331.45	99.6761		2331.45	99.0906
2329.59	99.6588		2329.59	98.9852
2327.72	99.6422		2327.72	98.9395
2325.86	99.6392		2325.86	98.9967
2324	99.696		2324	99.0209
2322.13	99.8143		2322.13	99.0223
2320.27	99.819		2320.27	99.0364
2318.4	99.7708		2318.4	99.0381
2316.54	99.7655		2316.54	99.0403
2314.68	99.8347		2314.68	99.0246
2312.81	99.8418		2312.81	99.0078
2310.95	99.7954		2310.95	99.0698
2309.09	99.7513		2309.09	99.1908
2307.22	99.6214		2307.22	99.2145
2305.36	99.5771		2305.36	99.121
2303.49	99.6735		2303.49	99.2735
2301.63	99.6725		2301.63	99.2554
2299.77	99.5913		2299.77	99.1392
2297.9	99.6828		2297.9	99.0728
2296.04	99.7869		2296.04	99.0471
2294.18	99.8148		2294.18	99.2542
2292.31	99.778		2292.31	99.5428
2290.45	99.6735		2290.45	99.4935
2288.59	99.6877		2288.59	99.3743
2286.72	99.6321		2286.72	99.332
2284.86	99.6671		2284.86	99.2803
2282.99	99.7585		2282.99	99.151
2281.13	99.6876		2281.13	99.0347
2279.27	99.6718		2279.27	99.1125
2277.4	99.7582		2277.4	99.2098
2275.54	99.7435		2275.54	99.3422
2273.68	99.6662		2273.68	99.3566
2271.81	99.6141		2271.81	99.1915
2269.95	99.5503		2269.95	99.1121
2268.09	99.6617		2268.09	99.2208
2266.22	99.6229		2266.22	99.3497
2264.36	99.6856		2264.36	99.0615
2262.49	100.037		2262.49	99.0723
2260.63	99.9492		2260.63	99.4031
2258.77	99.5668		2258.77	99.4271
2256.9	99.418		2256.9	99.1842
2255.04	99.4775		2255.04	99.1213
2253.18	99.601		2253.18	99.2646
2251.31	99.7679		2251.31	99.2868
2249.45	99.8364		2249.45	99.3292
2247.58	99.6809		2247.58	99.2601
2245.72	99.3608		2245.72	99.025
2243.86	99.2121		2243.86	99.1354
2241.99	99.2193		2241.99	99.3646
2240.13	99.5138		2240.13	99.3682
2238.27	99.9188		2238.27	99.6778
2236.4	99.7949		2236.4	99.8788
2234.54	99.6311		2234.54	99.4154
2232.68	99.9717		2232.68	99.1249
2230.81	100.21		2230.81	99.1343
2228.95	100.027		2228.95	99.3399
2227.08	99.8952		2227.08	99.725
2225.22	99.8017		2225.22	99.8826
2223.36	99.8525		2223.36	99.8623
2221.49	99.7793		2221.49	99.6795
2219.63	99.8028		2219.63	99.4479
2217.77	99.9031		2217.77	99.704
2215.9	99.6493		2215.9	99.7296
2214.04	99.4369		2214.04	99.4313
2212.18	99.5389		2212.18	99.4027
2210.31	99.6707		2210.31	99.6462
2208.45	99.8314		2208.45	99.9163
2206.58	99.8641		2206.58	99.8112
2204.72	99.8465		2204.72	99.5832
2202.86	99.5063		2202.86	99.3171
2200.99	99.4919		2200.99	98.9903
2199.13	100.079		2199.13	98.9697
2197.27	99.9317		2197.27	99.2726
2195.4	99.183		2195.4	99.5405
2193.54	99.199		2193.54	99.4224
2191.67	99.9115		2191.67	99.3412
2189.81	100.419		2189.81	99.2767
2187.95	100.599		2187.95	98.7914
2186.08	100.326		2186.08	99.0354
2184.22	100.014		2184.22	99.315
2182.36	99.6496		2182.36	99.369
2180.49	99.7526		2180.49	99.6107
2178.63	100.044		2178.63	100.097
2176.77	100.114		2176.77	99.6171
2174.9	99.963		2174.9	99.2157
2173.04	99.4398		2173.04	99.5101
2171.17	99.666		2171.17	99.4523
2169.31	100.052		2169.31	99.564
2167.45	99.8704		2167.45	99.6278
2165.58	99.8335		2165.58	99.4931
2163.72	99.817		2163.72	99.4596
2161.86	99.8411		2161.86	99.4677
2159.99	100.267		2159.99	99.4146
2158.13	100.452		2158.13	99.6969
2156.26	99.7578		2156.26	100.244
2154.4	99.4591		2154.4	100.374
2152.54	99.8114		2152.54	99.9775
2150.67	99.8257		2150.67	100.18
2148.81	99.7154		2148.81	100.055
2146.95	99.7767		2146.95	99.8004
2145.08	99.6267		2145.08	99.7375
2143.22	99.6443		2143.22	99.8758
2141.36	99.8361		2141.36	99.7148
2139.49	99.9515		2139.49	99.597
2137.63	100.077		2137.63	99.826
2135.76	99.891		2135.76	99.6528
2133.9	99.8441		2133.9	99.5873
2132.04	99.775		2132.04	99.5665
2130.17	99.5543		2130.17	99.5882
2128.31	99.9712		2128.31	99.5698
2126.45	100.247		2126.45	99.5433
2124.58	99.9303		2124.58	99.7242
2122.72	99.6701		2122.72	99.8328
2120.86	99.5832		2120.86	99.5496
2118.99	99.5742		2118.99	99.5659
2117.13	99.7		2117.13	99.545
2115.26	99.9201		2115.26	99.0788
2113.4	100.012		2113.4	99.0951
2111.54	99.9167		2111.54	99.4274
2109.67	99.8522		2109.67	99.4026
2107.81	100.047		2107.81	99.3519
2105.95	99.9869		2105.95	99.596
2104.08	99.6957		2104.08	99.5947
2102.22	99.8518		2102.22	99.4978
2100.35	100.119		2100.35	99.2646
2098.49	100.089		2098.49	99.3793
2096.63	99.9675		2096.63	99.8164
2094.76	99.9113		2094.76	99.7597
2092.9	100.157		2092.9	99.6636
2091.04	99.9079		2091.04	99.7831
2089.17	99.5017		2089.17	99.8237
2087.31	99.7257		2087.31	99.6069
2085.45	99.7477		2085.45	99.7063
2083.58	99.56		2083.58	99.6957
2081.72	99.7003		2081.72	99.4757
2079.85	99.8638		2079.85	99.5957
2077.99	100.039		2077.99	99.7302
2076.13	99.981		2076.13	99.5095
2074.26	99.7765		2074.26	99.351
2072.4	99.7673		2072.4	99.1584
2070.54	100.079		2070.54	99.2048
2068.67	100.385		2068.67	99.4148
2066.81	100.238		2066.81	99.6288
2064.95	99.8433		2064.95	99.8529
2063.08	99.5266		2063.08	99.6444
2061.22	99.3848		2061.22	99.3918
2059.35	99.4644		2059.35	99.5884
2057.49	99.7849		2057.49	99.9036
2055.63	100.034		2055.63	99.5922
2053.76	100.037		2053.76	99.2098
2051.9	100.154		2051.9	99.2899
2050.04	100.035		2050.04	99.3259
2048.17	99.9707		2048.17	99.3743
2046.31	100.342		2046.31	99.5309
2044.44	100.468		2044.44	99.703
2042.58	100.163		2042.58	99.4741
2040.72	99.9417		2040.72	99.3576
2038.85	100.144		2038.85	99.4741
2036.99	100.227		2036.99	99.3753
2035.13	100.198		2035.13	99.2982
2033.26	99.9337		2033.26	99.4958
2031.4	99.8951		2031.4	99.7502
2029.54	100.517		2029.54	99.4999
2027.67	101.216		2027.67	99.3028
2025.81	101.307		2025.81	99.485
2023.94	100.378		2023.94	99.3687
2022.08	99.874		2022.08	99.6112
2020.22	100.146		2020.22	100.382
2018.35	100.208		2018.35	100.306
2016.49	99.949		2016.49	99.9716
2014.63	99.6558		2014.63	100.016
2012.76	99.4794		2012.76	99.9094
2010.9	99.4733		2010.9	99.248
2009.04	99.7444		2009.04	99.221
2007.17	99.9286		2007.17	99.6386
2005.31	99.827		2005.31	99.8559
2003.44	99.7123		2003.44	99.8468
2001.58	99.5967		2001.58	99.6385
1999.72	99.6953		1999.72	99.5809
1997.85	99.7337		1997.85	99.5408
1995.99	99.761		1995.99	100.105
1994.13	99.8365		1994.13	100.309
1992.26	99.9862		1992.26	99.4574
1990.4	100.115		1990.4	99.3317
1988.53	99.7289		1988.53	99.5701
1986.67	99.3162		1986.67	99.5213
1984.81	99.3184		1984.81	99.491
1982.94	99.5424		1982.94	99.5549
1981.08	100.086		1981.08	99.634
1979.22	100.227		1979.22	99.7027
1977.35	100.422		1977.35	99.6233
1975.49	100.963		1975.49	99.5985
1973.63	101.11		1973.63	100.239
1971.76	100.925		1971.76	100.366
1969.9	100.699		1969.9	99.5614
1968.03	100.229		1968.03	99.138
1966.17	99.444		1966.17	99.1036
1964.31	98.9272		1964.31	98.8792
1962.44	99.2364		1962.44	99.1291
1960.58	99.6784		1960.58	99.7539
1958.72	99.6765		1958.72	100.145
1956.85	99.6642		1956.85	99.8597
1954.99	99.565		1954.99	99.6698
1953.13	99.382		1953.13	99.5916
1951.26	99.6068		1951.26	99.9125
1949.4	100.21		1949.4	100.303
1947.53	100.131		1947.53	99.8485
1945.67	99.5567		1945.67	99.4964
1943.81	99.3208		1943.81	99.7775
1941.94	99.5477		1941.94	99.9253
1940.08	99.7096		1940.08	99.5299
1938.22	99.6974		1938.22	99.2006
1936.35	99.7115		1936.35	99.3144
1934.49	99.8647		1934.49	99.5026
1932.62	99.779		1932.62	99.5637
1930.76	99.648		1930.76	99.8762
1928.9	99.8067		1928.9	99.7478
1927.03	99.6939		1927.03	99.5232
1925.17	99.6859		1925.17	99.4122
1923.31	99.9294		1923.31	99.5068
1921.44	100.217		1921.44	99.6759
1919.58	99.9981		1919.58	99.6361
1917.72	99.5702		1917.72	99.5141
1915.85	99.528		1915.85	99.502
1913.99	99.6367		1913.99	99.6701
1912.12	99.7871		1912.12	99.6447
1910.26	99.7644		1910.26	99.6025
1908.4	99.8617		1908.4	99.9373
1906.53	99.936		1906.53	99.726
1904.67	99.7836		1904.67	99.314
1902.81	99.6764		1902.81	99.3563
1900.94	99.7137		1900.94	99.5425
1899.08	99.8812		1899.08	99.6299
1897.21	99.9244		1897.21	99.6233
1895.35	99.5951		1895.35	99.6751
1893.49	99.4312		1893.49	99.6658
1891.62	99.5825		1891.62	99.4599
1889.76	99.7468		1889.76	99.5589
1887.9	99.7552		1887.9	99.7341
1886.03	99.9331		1886.03	99.6769
1884.17	100.05		1884.17	99.5781
1882.31	99.9179		1882.31	99.4307
1880.44	99.7877		1880.44	99.4554
1878.58	99.608		1878.58	99.6144
1876.71	99.5683		1876.71	99.6062
1874.85	99.6491		1874.85	99.4973
1872.99	99.7258		1872.99	99.2762
1871.12	99.7738		1871.12	99.2212
1869.26	99.6914		1869.26	99.3819
1867.4	99.6768		1867.4	99.5261
1865.53	99.7257		1865.53	99.5915
1863.67	99.7021		1863.67	99.4797
1861.81	99.5747		1861.81	99.4216
1859.94	99.5593		1859.94	99.393
1858.08	99.6527		1858.08	99.3263
1856.21	99.6579		1856.21	99.4178
1854.35	99.5606		1854.35	99.4864
1852.49	99.6031		1852.49	99.396
1850.62	99.6404		1850.62	99.3478
1848.76	99.629		1848.76	99.3617
1846.9	99.7525		1846.9	99.3184
1845.03	99.7168		1845.03	99.3671
1843.17	99.5284		1843.17	99.4807
1841.3	99.5866		1841.3	99.4452
1839.44	99.6789		1839.44	99.4027
1837.58	99.6185		1837.58	99.4043
1835.71	99.5656		1835.71	99.3547
1833.85	99.7083		1833.85	99.2899
1831.99	99.8689		1831.99	99.3983
1830.12	99.7436		1830.12	99.5436
1828.26	99.575		1828.26	99.4544
1826.4	99.6408		1826.4	99.3676
1824.53	99.7204		1824.53	99.4231
1822.67	99.6445		1822.67	99.4525
1820.8	99.658		1820.8	99.4136
1818.94	99.7602		1818.94	99.3214
1817.08	99.8606		1817.08	99.3427
1815.21	99.7081		1815.21	99.3295
1813.35	99.492		1813.35	99.2523
1811.49	99.4969		1811.49	99.3113
1809.62	99.4932		1809.62	99.3292
1807.76	99.4469		1807.76	99.2559
1805.9	99.4464		1805.9	99.204
1804.03	99.4856		1804.03	99.1157
1802.17	99.5064		1802.17	99.0055
1800.3	99.4132		1800.3	99.0091
1798.44	99.3152		1798.44	98.982
1796.58	99.1901		1796.58	98.9423
1794.71	99.1953		1794.71	98.8413
1792.85	99.2406		1792.85	98.7372
1790.99	99.0996		1790.99	98.7614
1789.12	98.9725		1789.12	98.6349
1787.26	98.9482		1787.26	98.527
1785.39	98.857		1785.39	98.454
1783.53	98.726		1783.53	98.3768
1781.67	98.6795		1781.67	98.3633
1779.8	98.683		1779.8	98.4254
1777.94	98.64		1777.94	98.4153
1776.08	98.6573		1776.08	98.3305
1774.21	98.8485		1774.21	98.3209
1772.35	98.9571		1772.35	98.3484
1770.49	99.0041		1770.49	98.436
1768.62	99.0919		1768.62	98.4909
1766.76	99.0905		1766.76	98.5694
1764.89	99.0784		1764.89	98.5565
1763.03	99.0892		1763.03	98.4115
1761.17	99.0177		1761.17	98.329
1759.3	98.9209		1759.3	98.2519
1757.44	98.8206		1757.44	98.1009
1755.58	98.7031		1755.58	97.8772
1753.71	98.5688		1753.71	97.572
1751.85	98.2941		1751.85	97.2972
1749.99	98.0374		1749.99	97.0225
1748.12	97.9088		1748.12	96.5375
1746.26	97.7683		1746.26	96.1918
1744.39	97.5188		1744.39	95.988
1742.53	97.3975		1742.53	95.7705
1740.67	97.5286		1740.67	95.6815
1738.8	97.5677		1738.8	95.6442
1736.94	97.6442		1736.94	95.5409
1735.08	97.6607		1735.08	95.2919
1733.21	97.535		1733.21	95.5081
1731.35	97.6689		1731.35	95.7161
1729.48	97.8119		1729.48	95.744
1727.62	97.8658		1727.62	95.797
1725.76	97.9752		1725.76	95.8518
1723.89	98.0162		1723.89	95.9589
1722.03	98.0506		1722.03	96.0274
1720.17	98.0994		1720.17	95.8832
1718.3	97.9853		1718.3	95.7889
1716.44	97.8816		1716.44	96.043
1714.58	97.8648		1714.58	96.1982
1712.71	97.8333		1712.71	96.2038
1710.85	97.8323		1710.85	96.187
1708.98	97.9243		1708.98	96.2004
1707.12	98.0122		1707.12	96.2139
1705.26	97.9789		1705.26	96.3155
1703.39	97.9476		1703.39	96.3435
1701.53	97.7268		1701.53	96.0528
1699.67	97.1368		1699.67	95.7474
1697.8	96.7718		1697.8	95.3325
1695.94	96.253		1695.94	94.8027
1694.08	95.7818		1694.08	94.5447
1692.21	95.6131		1692.21	94.2938
1690.35	95.7188		1690.35	94.2583
1688.48	96.0784		1688.48	94.5138
1686.62	96.3287		1686.62	94.6554
1684.76	96.5852		1684.76	94.9596
1682.89	97.0322		1682.89	95.7328
1681.03	97.3041		1681.03	96.0157
1679.17	97.3498		1679.17	96.0479
1677.3	97.3787		1677.3	96.0095
1675.44	97.4227		1675.44	96.1425
1673.57	97.4785		1673.57	96.451
1671.71	97.6164		1671.71	96.545
1669.85	97.7454		1669.85	96.6763
1667.98	97.7425		1667.98	96.7858
1666.12	97.7159		1666.12	96.6541
1664.26	97.6583		1664.26	96.3113
1662.39	97.5011		1662.39	95.9847
1660.53	97.2265		1660.53	95.5624
1658.67	96.8276		1658.67	94.8652
1656.8	96.4591		1656.8	93.7891
1654.94	96.1893		1654.94	92.5786
1653.07	94.7959		1653.07	91.0025
1651.21	93.0474		1651.21	89.4004
1649.35	91.5733		1649.35	87.6768
1647.48	89.0644		1647.48	85.1528
1645.62	86.3069		1645.62	82.7071
1643.76	85.4423		1643.76	81.8911
1641.89	86.1598		1641.89	82.467
1640.03	87.7895		1640.03	83.9457
1638.16	89.3617		1638.16	85.2775
1636.3	90.9423		1636.3	86.5304
1634.44	92.717		1634.44	88.4545
1632.57	93.7499		1632.57	89.6227
1630.71	94.3368		1630.71	90.2208
1628.85	94.8347		1628.85	90.7416
1626.98	95.3794		1626.98	91.5019
1625.12	95.7899		1625.12	92.1352
1623.26	96.1798		1623.26	92.8898
1621.39	96.5511		1621.39	93.5901
1619.53	96.798		1619.53	93.7576
1617.66	96.8729		1617.66	93.7011
1615.8	96.7549		1615.8	93.8291
1613.94	96.6617		1613.94	93.8657
1612.07	96.5286		1612.07	93.5649
1610.21	96.31		1610.21	93.0609
1608.35	96.0166		1608.35	92.5217
1606.48	95.8676		1606.48	92.175
1604.62	95.9342		1604.62	92.0374
1602.76	96.0896		1602.76	92.1075
1600.89	96.2178		1600.89	92.328
1599.03	96.2573		1599.03	92.5495
1597.16	96.2536		1597.16	92.6541
1595.3	96.2781		1595.3	92.7266
1593.44	96.3137		1593.44	92.7277
1591.57	96.4034		1591.57	92.7114
1589.71	96.459		1589.71	92.7562
1587.85	96.4781		1587.85	92.8514
1585.98	96.4406		1585.98	93.0138
1584.12	96.455		1584.12	93.2627
1582.25	96.592		1582.25	93.5839
1580.39	96.8056		1580.39	93.9297
1578.53	97.1018		1578.53	94.1628
1576.66	97.3767		1576.66	94.3828
1574.8	97.5374		1574.8	94.9434
1572.94	97.6698		1572.94	95.2485
1571.07	97.7854		1571.07	95.2352
1569.21	97.8317		1569.21	95.3635
1567.35	97.9525		1567.35	95.6408
1565.48	98.116		1565.48	95.8182
1563.62	98.297		1563.62	95.9582
1561.75	98.479		1561.75	95.9544
1559.89	98.4853		1559.89	96.0646
1558.03	98.5803		1558.03	97.0283
1556.16	98.8151		1556.16	97.5853
1554.3	98.7824		1554.3	97.6146
1552.44	98.7548		1552.44	97.6405
1550.57	98.7886		1550.57	97.7215
1548.71	98.8742		1548.71	97.7844
1546.85	99.0328		1546.85	97.791
1544.98	99.0123		1544.98	97.7785
1543.12	99.0051		1543.12	97.7288
1541.25	99.0495		1541.25	97.7011
1539.39	98.7727		1539.39	97.98
1537.53	98.7153		1537.53	98.1069
1535.66	98.8734		1535.66	97.9594
1533.8	98.8971		1533.8	97.8051
1531.94	98.7665		1531.94	97.7507
1530.07	98.704		1530.07	97.545
1528.21	98.663		1528.21	97.253
1526.34	98.3456		1526.34	96.8054
1524.48	97.8114		1524.48	95.9464
1522.62	97.2961		1522.62	94.7427
1520.75	96.5847		1520.75	93.3802
1518.89	96.0875		1518.89	92.2788
1517.03	95.6605		1517.03	91.3186
1515.16	95.3361		1515.16	90.7502
1513.3	95.391		1513.3	90.7525
1511.44	95.8373		1511.44	91.5048
1509.57	96.4364		1509.57	92.4354
1507.71	96.9029		1507.71	93.3937
1505.84	97.3759		1505.84	95.0793
1503.98	97.7141		1503.98	95.9662
1502.12	97.8595		1502.12	96.1415
1500.25	97.9134		1500.25	96.2425
1498.39	97.9166		1498.39	96.3469
1496.53	97.8279		1496.53	96.4063
1494.66	97.734		1494.66	96.4605
1492.8	97.7439		1492.8	96.3449
1490.94	97.7334		1490.94	96.0537
1489.07	97.5193		1489.07	95.7783
1487.21	97.1619		1487.21	95.304
1485.34	96.8012		1485.34	94.5694
1483.48	96.3801		1483.48	93.7002
1481.62	95.859		1481.62	92.8825
1479.75	95.4355		1479.75	92.4496
1477.89	95.1507		1477.89	92.26
1476.03	94.8695		1476.03	92.0728
1474.16	94.434		1474.16	91.5783
1472.3	93.3866		1472.3	90.5162
1470.43	91.965		1470.43	88.9475
1468.57	90.539		1468.57	86.9888
1466.71	89.2092		1466.71	85.0762
1464.84	88.1347		1464.84	83.6198
1462.98	87.534		1462.98	83.0306
1461.12	86.9718		1461.12	82.6058
1459.25	86.1554		1459.25	81.8395
1457.39	84.641		1457.39	80.6585
1455.53	82.867		1455.53	79.7153
1453.66	81.6087		1453.66	78.8515
1451.8	80.7983		1451.8	78.2006
1449.93	80.3851		1449.93	77.6874
1448.07	80.1629		1448.07	77.3713
1446.21	80.0501		1446.21	77.3245
1444.34	79.8783		1444.34	77.2491
1442.48	79.3755		1442.48	76.8953
1440.62	78.5078		1440.62	76.1663
1438.75	77.2466		1438.75	74.9564
1436.89	76.1838		1436.89	74.0598
1435.03	76.7324		1435.03	74.7531
1433.16	78.1351		1433.16	76.0081
1431.3	79.7678		1431.3	77.3611
1429.43	81.8726		1429.43	78.9522
1427.57	84.0348		1427.57	80.4454
1425.71	85.8794		1425.71	81.7743
1423.84	87.7896		1423.84	83.5796
1421.98	89.426		1421.98	85.2728
1420.12	90.5454		1420.12	86.4546
1418.25	91.8096		1418.25	88.1597
1416.39	92.8475		1416.39	89.4191
1414.52	93.3952		1414.52	89.7206
1412.66	93.4849		1412.66	89.3079
1410.8	93.3017		1410.8	88.6848
1408.93	93.1124		1408.93	88.2779
1407.07	93.2425		1407.07	88.499
1405.21	93.7073		1405.21	89.5113
1403.34	94.3373		1403.34	90.86
1401.48	94.8236		1401.48	91.736
1399.62	95.1433		1399.62	92.3663
1397.75	95.2782		1397.75	92.8328
1395.89	95.2778		1395.89	93.0097
1394.02	95.1871		1394.02	93.104
1392.16	95.0298		1392.16	93.0367
1390.3	94.719		1390.3	92.6606
1388.43	94.2265		1388.43	92.0315
1386.57	93.3607		1386.57	91.1344
1384.71	92.2696		1384.71	90.0247
1382.84	90.9388		1382.84	88.4852
1380.98	89.0547		1380.98	86.3466
1379.11	86.2665		1379.11	83.2671
1377.25	83.8162		1377.25	80.3703
1375.39	83.1186		1375.39	78.9745
1373.52	84.1077		1373.52	79.0825
1371.66	85.4865		1371.66	79.6619
1369.8	86.6899		1369.8	80.2196
1367.93	87.7677		1367.93	80.8352
1366.07	88.5679		1366.07	81.3528
1364.21	88.9326		1364.21	81.5725
1362.34	89.2492		1362.34	82.0972
1360.48	90.0255		1360.48	83.3322
1358.61	91.1969		1358.61	84.9374
1356.75	92.3181		1356.75	86.4595
1354.89	93.2362		1354.89	87.7541
1353.02	93.915		1353.02	88.865
1351.16	94.5222		1351.16	89.9139
1349.3	95.0771		1349.3	90.8836
1347.43	95.5081		1347.43	91.7295
1345.57	95.7707		1345.57	92.3212
1343.71	95.8897		1343.71	92.6377
1341.84	95.9498		1341.84	92.7419
1339.98	95.9298		1339.98	92.6973
1338.11	95.6451		1338.11	92.4022
1336.25	95.2149		1336.25	91.8407
1334.39	94.8386		1334.39	91.3165
1332.52	94.6302		1332.52	91.1645
1330.66	94.6589		1330.66	91.3537
1328.8	94.8694		1328.8	91.7898
1326.93	95.1553		1326.93	92.3218
1325.07	95.5076		1325.07	92.8891
1323.2	95.9057		1323.2	93.4159
1321.34	96.2421		1321.34	93.8368
1319.48	96.3828		1319.48	94.0254
1317.61	96.3762		1317.61	93.9868
1315.75	96.2145		1315.75	93.791
1313.89	95.8654		1313.89	93.3543
1312.02	95.4181		1312.02	92.7423
1310.16	95.0867		1310.16	92.1904
1308.3	94.9652		1308.3	91.8846
1306.43	94.9681		1306.43	91.7959
1304.57	95.0114		1304.57	91.8315
1302.7	95.1338		1302.7	92.0441
1300.84	95.3602		1300.84	92.4027
1298.98	95.6653		1298.98	92.796
1297.11	95.8312		1297.11	93.0907
1295.25	95.8006		1295.25	93.1545
1293.39	95.628		1293.39	92.9362
1291.52	95.3348		1291.52	92.5637
1289.66	95.0143		1289.66	92.1552
1287.8	94.8532		1287.8	91.9219
1285.93	94.8404		1285.93	91.8359
1284.07	95.0083		1284.07	91.7994
1282.2	95.1944		1282.2	91.5668
1280.34	95.1825		1280.34	90.9379
1278.48	94.9699		1278.48	90.0084
1276.61	94.5959		1276.61	89.0904
1274.75	94.2239		1274.75	88.4246
1272.89	94.0369		1272.89	88.0425
1271.02	93.9272		1271.02	87.8024
1269.16	93.7447		1269.16	87.6397
1267.29	93.4348		1267.29	87.4576
1265.43	92.7726		1265.43	87.1764
1263.57	91.6286		1263.57	86.6984
1261.7	90.5495		1261.7	86.285
1259.84	90.2755		1259.84	86.4431
1257.98	90.9309		1257.98	87.185
1256.11	91.9697		1256.11	88.1053
1254.25	92.8287		1254.25	88.9075
1252.39	93.3093		1252.39	89.339
1250.52	93.4284		1250.52	89.4344
1248.66	93.1627		1248.66	89.1893
1246.79	92.7017		1246.79	88.8372
1244.93	92.3412		1244.93	88.6645
1243.07	92.2895		1243.07	88.7385
1241.2	92.4801		1241.2	89.0529
1239.34	92.7656		1239.34	89.4649
1237.48	93.089		1237.48	89.8562
1235.61	93.4234		1235.61	90.1652
1233.75	93.6911		1233.75	90.3383
1231.89	93.8683		1231.89	90.3594
1230.02	93.8823		1230.02	90.2231
1228.16	93.8636		1228.16	90.0395
1226.29	93.9713		1226.29	89.916
1224.43	94.2784		1224.43	89.973
1222.57	94.6586		1222.57	90.1196
1220.7	94.9372		1220.7	90.3681
1218.84	95.1975		1218.84	90.6836
1216.98	95.4116		1216.98	91.052
1215.11	95.5488		1215.11	91.4002
1213.25	95.6864		1213.25	91.6406
1211.38	95.7069		1211.38	91.8164
1209.52	95.5832		1209.52	91.9231
1207.66	95.4143		1207.66	91.9632
1205.79	95.3233		1205.79	92.0561
1203.93	95.3402		1203.93	92.1318
1202.07	95.2805		1202.07	92.0373
1200.2	95.0401		1200.2	91.7336
1198.34	94.8625		1198.34	91.4769
1196.48	94.9602		1196.48	91.4445
1194.61	95.2159		1194.61	91.53
1192.75	95.3863		1192.75	91.5858
1190.88	95.4417		1190.88	91.64
1189.02	95.5396		1189.02	91.6839
1187.16	95.646		1187.16	91.5629
1185.29	95.5738		1185.29	91.2083
1183.43	95.307		1183.43	90.6654
1181.57	95.0103		1181.57	90.1129
1179.7	94.7131		1179.7	89.7244
1177.84	94.5258		1177.84	89.5638
1175.98	94.38		1175.98	89.5345
1174.11	94.2238		1174.11	89.5228
1172.25	94.3679		1172.25	89.8418
1170.38	94.775		1170.38	90.5681
1168.52	95.0129		1168.52	91.2312
1166.66	94.9536		1166.66	91.5468
1164.79	94.5918		1164.79	91.4533
1162.93	93.9754		1162.93	90.9451
1161.07	93.2007		1161.07	90.214
1159.2	92.2369		1159.2	89.3019
1157.34	91.1286		1157.34	88.1975
1155.47	90.4358		1155.47	87.4789
1153.61	90.7703		1153.61	87.6847
1151.75	91.4261		1151.75	88.0373
1149.88	91.2173		1149.88	87.4463
1148.02	90.4953		1148.02	86.3604
1146.16	90.6892		1146.16	86.3371
1144.29	91.9859		1144.29	87.6733
1142.43	93.4345		1142.43	89.3611
1140.57	94.3869		1140.57	90.6637
1138.7	94.8739		1138.7	91.395
1136.84	95.1766		1136.84	91.7323
1134.97	95.3512		1134.97	91.927
1133.11	95.3077		1133.11	92.0462
1131.25	95.1917		1131.25	92.0163
1129.38	95.0152		1129.38	91.8767
1127.52	94.8044		1127.52	91.726
1125.66	94.7375		1125.66	91.5801
1123.79	94.6537		1123.79	91.2979
1121.93	94.4163		1121.93	90.8285
1120.07	94.0012		1120.07	90.1914
1118.2	93.4952		1118.2	89.3731
1116.34	93.0242		1116.34	88.35
1114.47	92.5459		1114.47	87.346
1112.61	92.1483		1112.61	86.5168
1110.75	91.8852		1110.75	86.0044
1108.88	91.6915		1108.88	86.0849
1107.02	91.6984		1107.02	86.7285
1105.16	91.9533		1105.16	87.7356
1103.29	92.2838		1103.29	88.7765
1101.43	92.5316		1101.43	89.6664
1099.56	92.7702		1099.56	90.4764
1097.7	92.9801		1097.7	91.1109
1095.84	93.1137		1095.84	91.4689
1093.97	93.0723		1093.97	91.489
1092.11	92.7604		1092.11	91.1481
1090.25	92.5197		1090.25	90.7346
1088.38	92.5888		1088.38	90.5967
1086.52	92.7107		1086.52	90.4579
1084.66	92.6544		1084.66	89.7213
1082.79	92.3594		1082.79	88.4248
1080.93	91.8714		1080.93	86.991
1079.06	91.4492		1079.06	85.8018
1077.2	91.3587		1077.2	85.2656
1075.34	91.6314		1075.34	85.5567
1073.47	92.2519		1073.47	86.7439
1071.61	93.1355		1071.61	88.5879
1069.75	93.9259		1069.75	90.3395
1067.88	94.3422		1067.88	91.5131
1066.02	94.5268		1066.02	92.2365
1064.15	94.6152		1064.15	92.6506
1062.29	94.5761		1062.29	92.8133
1060.43	94.4072		1060.43	92.8092
1058.56	94.1258		1058.56	92.6119
1056.7	93.5841		1056.7	92.1843
1054.84	92.7484		1054.84	91.3653
1052.97	91.774		1052.97	90.2315
1051.11	91.0755		1051.11	89.3173
1049.25	91.0674		1049.25	88.9616
1047.38	91.4924		1047.38	88.8588
1045.52	91.7835		1045.52	88.6169
1043.65	91.7792		1043.65	88.0922
1041.79	91.5328		1041.79	87.4765
1039.93	91.1868		1039.93	87.0252
1038.06	90.9908		1038.06	86.8057
1036.2	90.8749		1036.2	86.5947
1034.34	90.7576		1034.34	86.2711
1032.47	90.6378		1032.47	86.0863
1030.61	90.4736		1030.61	86.157
1028.75	90.3339		1028.75	86.3995
1026.88	90.2204		1026.88	86.6547
1025.02	90.0031		1025.02	86.6561
1023.15	89.6789		1023.15	86.2988
1021.29	89.2273		1021.29	85.5002
1019.43	88.6163		1019.43	84.3125
1017.56	88.0917		1017.56	83.3769
1015.7	88.0689		1015.7	83.313
1013.84	88.6936		1013.84	84.1129
1011.97	89.6217		1011.97	85.5036
1010.11	90.685		1010.11	87.1209
1008.24	91.9285		1008.24	88.6953
1006.38	93.1158		1006.38	90.1167
1004.52	93.9827		1004.52	91.175
1002.65	94.6307		1002.65	91.8795
1000.79	95.0444		1000.79	92.3796
998.927	95.1581		998.927	92.7178
997.063	95.2247		997.063	92.8541
995.199	95.2887		995.199	92.8977
993.336	95.2139		993.336	92.883
991.472	95.0186		991.472	92.7656
989.608	94.7685		989.608	92.5989
987.745	94.5981		987.745	92.4474
985.881	94.6669		985.881	92.4122
984.017	94.8852		984.017	92.5352
982.154	95.1424		982.154	92.6037
980.29	95.3649		980.29	92.6392
978.426	95.5544		978.426	92.7415
976.563	95.7259		976.563	92.8036
974.699	95.8941		974.699	92.841
972.835	96.048		972.835	92.8312
970.972	96.0941		970.972	92.7673
969.108	96.0136		969.108	92.694
967.244	95.8109		967.244	92.6842
965.38	95.4579		965.38	92.5848
963.517	94.8923		963.517	92.1614
961.653	94.0586		961.653	91.3598
959.789	93.0039		959.789	90.3011
957.926	92.1314		957.926	89.3301
956.062	91.932		956.062	89.0631
954.198	92.2369		954.198	89.2524
952.335	92.0438		952.335	88.9
950.471	90.946		950.471	87.7594
948.607	89.8132		948.607	86.6527
946.744	89.6666		946.744	86.6516
944.88	90.6417		944.88	87.8394
943.016	92.1651		943.016	89.4589
941.153	93.6574		941.153	90.9271
939.289	94.8065		939.289	92.2401
937.425	95.5664		937.425	93.3888
935.562	96.0694		935.562	94.1396
933.698	96.349		933.698	94.4262
931.834	96.4292		931.834	94.4304
929.971	96.4075		929.971	94.3344
928.107	96.2447		928.107	94.1197
926.243	95.8609		926.243	93.7466
924.38	95.3612		924.38	93.2444
922.516	94.5755		922.516	92.4309
920.652	93.4188		920.652	91.2591
918.789	91.967		918.789	89.6598
916.925	89.4753		916.925	87.1004
915.061	86.5515		915.061	84.1884
913.198	86.2038		913.198	83.7864
911.334	88.752		911.334	86.3759
909.47	91.4137		909.47	89.1593
907.607	92.7502		907.607	90.6787
905.743	93.1171		905.743	91.0468
903.879	92.7811		903.879	90.7584
902.016	91.9289		902.016	90.0189
900.152	90.7162		900.152	88.6995
898.288	88.7441		898.288	86.6729
896.425	85.749		896.425	83.6629
894.561	81.729		894.561	79.5218
892.697	76.5151		892.697	74.3788
890.834	70.2935		890.834	68.5359
888.97	63.9271		888.97	62.7044
887.106	59.4074		887.106	58.6316
885.243	59.035		885.243	58.2129
883.379	63.3285		883.379	62.0252
881.515	70.3399		881.515	68.5015
879.652	77.2987		879.652	75.0332
877.788	82.7819		877.788	80.2877
875.924	86.6561		875.924	84.2396
874.061	89.3032		874.061	87.0445
872.197	91.1248		872.197	88.9849
870.333	92.5409		870.333	90.3877
868.47	93.6507		868.47	91.3523
866.606	94.3789		866.606	91.9801
864.742	94.875		864.742	92.4375
862.879	95.247		862.879	92.841
861.015	95.5789		861.015	93.1613
859.151	95.8261		859.151	93.3914
857.288	95.8108		857.288	93.5192
855.424	95.7964		855.424	93.4884
853.56	95.8016		853.56	93.2917
851.697	95.8169		851.697	93.1918
849.833	95.869		849.833	93.1687
847.969	95.9269		847.969	93.0733
846.106	95.9301		846.106	92.9273
844.242	95.9049		844.242	92.8856
842.378	95.8336		842.378	92.6946
840.515	95.6566		840.515	92.3818
838.651	95.4445		838.651	91.7714
836.787	95.1315		836.787	91.0108
834.924	94.7785		834.924	90.762
833.06	94.7981		833.06	91.0317
831.196	95.1869		831.196	91.4081
829.333	95.4294		829.333	91.6604
827.469	95.4003		827.469	92.2925
825.605	95.1914		825.605	93.0813
823.742	94.9181		823.742	93.5152
821.878	94.6721		821.878	93.5661
820.014	94.3885		820.014	93.3993
818.151	93.8217		818.151	93.2145
816.287	93.1445		816.287	92.7888
814.423	92.5604		814.423	92.2624
812.56	92.2165		812.56	91.7889
810.696	91.8093		810.696	91.0788
808.832	90.8979		808.832	90.0151
806.969	89.499		806.969	88.5967
805.105	87.6794		805.105	86.7992
803.241	85.5677		803.241	84.4611
801.378	83.1988		801.378	81.7473
799.514	80.6983		799.514	79.214
797.65	78.7933		797.65	77.6882
795.787	79.5082		795.787	78.6646
793.923	83.0265		793.923	82.0665
792.059	86.1893		792.059	85.1261
790.196	86.8359		790.196	85.7532
788.332	86.4414		788.332	85.2295
786.468	87.1018		786.468	85.6186
784.605	87.6368		784.605	85.8873
782.741	87.2688		782.741	85.2634
780.877	87.6771		780.877	85.5269
779.014	89.8266		779.014	87.7153
777.15	92.6434		777.15	90.3225
775.286	94.647		775.286	92.1228
773.423	95.6638		773.423	93.2176
771.559	96.2273		771.559	93.8955
769.695	96.5621		769.695	94.2234
767.832	96.7025		767.832	94.3925
765.968	96.6366		765.968	94.4477
764.104	96.164		764.104	94.1062
762.241	95.5908		762.241	93.41
760.377	95.1974		760.377	92.8317
758.513	94.8185		758.513	92.6408
756.65	94.8551		756.65	92.7244
754.786	95.4109		754.786	93.1193
752.922	95.7971		752.922	93.3524
751.059	95.697		751.059	93.1758
749.195	95.5838		749.195	93.1021
747.331	96.016		747.331	93.5675
745.468	96.8389		745.468	94.4536
743.604	97.3564		743.604	95.2051
741.74	97.5515		741.74	95.4405
739.877	97.6999		739.877	95.4974
738.013	97.7673		738.013	95.5719
736.149	97.8389		736.149	95.602
734.286	97.8416		734.286	95.5949
732.422	97.7564		732.422	95.3793
730.558	97.6092		730.558	95.1513
728.695	97.4512		728.695	95.0152
726.831	97.3193		726.831	94.9135
724.967	97.3291		724.967	94.8907
723.104	97.3624		723.104	94.84
721.24	97.1949		721.24	94.6533
719.376	97.117		719.376	94.5227
717.513	97.2456		717.513	94.8255
715.649	97.5362		715.649	95.2282
713.785	97.6504		713.785	95.3997
711.922	97.7132		711.922	95.6328
710.058	97.8315		710.058	95.9379
708.194	97.862		708.194	96.0993
706.331	97.7703		706.331	96.0702
704.467	97.4552		704.467	95.7396
702.603	97.1652		702.603	95.5031
700.74	97.3013		700.74	95.7196
698.876	97.635		698.876	96.0405
697.012	97.8485		697.012	96.1761
695.149	98.0706		695.149	96.3253
693.285	98.0855		693.285	96.4404
691.421	98.0533		691.421	96.3055
689.557	98.1144		689.557	96.0736
687.694	98.1884		687.694	95.9336
685.83	98.2793		685.83	95.9903
683.966	98.3244		683.966	95.9864
682.103	98.2312		682.103	95.9393
680.239	98.2271		680.239	96.018
678.375	98.2603		678.375	96.2888
676.512	98.3969		676.512	96.6006
674.648	98.5628		674.648	96.7515
672.784	98.5996		672.784	96.8174
670.921	98.5186		670.921	96.5664
669.057	98.305		669.057	96.1636
667.193	98.0996		667.193	96.2815
665.33	98.1346		665.33	96.5768
663.466	98.1441		663.466	96.5547
661.602	98.2866		661.602	96.5187
659.739	98.5267		659.739	96.3197
657.875	98.6525		657.875	96.292
656.011	98.5065		656.011	96.55
654.148	98.538		654.148	96.6978
652.284	98.6572		652.284	96.51
650.42	98.6142		650.42	96.334
648.557	98.4417		648.557	96.3842
646.693	98.413		646.693	96.3822
644.829	98.3309		644.829	96.0963
642.966	97.9259		642.966	95.7007
641.102	97.4624		641.102	95.1913
639.238	97.4129		639.238	95.1914
637.375	97.7583		637.375	95.742
635.511	98.0252		635.511	96.0952
633.647	98.3156		633.647	96.231
631.784	98.5468		631.784	96.2552
629.92	98.5941		629.92	96.3218
628.056	98.5321		628.056	96.4339
626.193	98.5575		626.193	96.4495
624.329	98.7604		624.329	96.462
622.465	98.7974		622.465	96.2342
620.602	98.536		620.602	96.103
618.738	98.4505		618.738	96.2853
616.874	98.6163		616.874	96.2514
615.011	98.4688		615.011	96.2911
613.147	98.294		613.147	96.5651
611.283	98.3919		611.283	96.5314
609.42	98.3711		609.42	96.4847
607.556	98.1217		607.556	96.4159
605.692	98.1221		605.692	96.0945
603.829	98.2598		603.829	96.0404
601.965	98.239		601.965	96.075
600.101	98.3609		600.101	96.04
598.238	98.2932		598.238	96.2502
596.374	98.1538		596.374	96.0887
594.51	97.9929		594.51	95.8085
592.647	97.9395		592.647	95.8155
590.783	97.8327		590.783	95.7776
588.919	97.9159		588.919	95.5379
587.056	97.8519		587.056	95.5041
585.192	97.4688		585.192	95.3036
583.328	97.3784		583.328	95.0807
581.465	97.4359		581.465	94.9933
579.601	97.5409		579.601	94.8197
577.737	97.3618		577.737	94.5883
575.874	97.1199		575.874	94.4152
574.01	97.1599		574.01	94.1142
572.146	97.2503		572.146	94.1824
570.283	96.8757		570.283	94.534
568.419	96.6375		568.419	94.7516
566.555	96.7053		566.555	94.8886
564.692	96.7408		564.692	95.2574
562.828	97.1484		562.828	95.1981
560.964	97.2043		560.964	95.0227
559.101	96.6965		559.101	95.0222
557.237	96.3581		557.237	95.009
555.373	96.2457		555.373	94.3136
553.51	95.9377		553.51	93.3477
551.646	95.4981		551.646	92.538
549.782	94.9202		549.782	91.9197
547.919	93.7482		547.919	91.1384
546.055	92.3851		546.055	89.7156
544.191	91.0992		544.191	88.0046
542.328	90.4172		542.328	87.1715
540.464	90.3674		540.464	87.4603
538.6	90.9916		538.6	88.3333
536.737	91.9109		536.737	89.3808
534.873	92.5711		534.873	90.3074
533.009	92.7803		533.009	90.6466
531.146	92.8945		531.146	90.4282
529.282	93.066		529.282	90.1385
527.418	93.391		527.418	90.1624
525.555	93.711		525.555	90.1254
523.691	92.8344		523.691	90.4593
521.827	92.1354		521.827	90.5638
519.964	92.8999		519.964	90.4774
518.1	94.1536		518.1	91.0172
516.236	94.9796		516.236	91.8381
514.373	95.2736		514.373	92.5556
512.509	95.6422		512.509	92.9319
510.645	96.0876		510.645	93.103
508.782	95.9986		508.782	93.1182
506.918	95.7959		506.918	92.9516
505.054	95.6372		505.054	92.976
503.191	95.7543		503.191	93.1353
501.327	95.9256		501.327	93.3153
499.463	95.6035		499.463	92.9636
497.6	95.2998		497.6	92.2705
495.736	95.1181		495.736	92.0528
493.872	94.952		493.872	92.3776
492.009	94.9398		492.009	92.352
490.145	94.8868		490.145	91.8351
488.281	94.6997		488.281	91.9241
486.418	94.7248		486.418	92.3132
484.554	95.0828		484.554	92.3122
482.69	95.8054		482.69	92.4663
480.827	95.7842		480.827	93.0105
478.963	95.468		478.963	93.6562
477.099	95.8258		477.099	93.5369
475.236	96.0518		475.236	93.4742
473.372	95.4734		473.372	93.27
471.508	94.7318		471.508	93.4426
469.645	95.0177		469.645	92.7271
467.781	95.4533		467.781	91.9836
465.917	95.5353		465.917	93.2275
464.054	96.7261		464.054	94.5241
462.19	97.9739		462.19	94.7564
460.326	97.7521		460.326	94.8075
458.463	97.6105		458.463	94.5926
456.599	97.4616		456.599	94.5285
454.735	97.2987		454.735	94.2471
452.872	96.5922		452.872	94.6621
451.008	96.9884		451.008	95.0768
449.144	97.5159		449.144	94.0898
447.281	97.5278		447.281	94.1316
445.417	96.7916		445.417	94.1085
443.553	95.4703		443.553	94.0797
441.69	94.5191		441.69	93.8808
439.826	94.4986		439.826	92.785
437.962	94.9692		437.962	91.4899
436.099	94.8157		436.099	89.597
434.235	91.6435		434.235	86.5933
432.371	88.374		432.371	84.6284
430.508	86.4293		430.508	83.284
428.644	85.5149		428.644	81.7691
426.78	87.2752		426.78	83.418
424.917	89.3184		424.917	87.126
423.053	91.5258		423.053	90.6749
421.189	92.9507		421.189	92.7976
419.326	94.5892		419.326	91.2141
417.462	94.2091		417.462	92.0708
415.598	94.5873		415.598	94.1729
413.734	96.7232		413.734	93.6187
411.871	95.6175		411.871	93.332
410.007	93.2169		410.007	93.217
408.143	94.5235		408.143	91.0971
406.28	98.7186		406.28	90.8821
404.416	98.9881		404.416	94.308
402.552	97.7245		402.552	94.8114
400.689	94.7806		400.689	93.044

## Sheet: limoneno
wavenumber	%Transmittance			Column1.1	Column1.2	Column1.3	Column1.4	Column1.5	Column1.6
4022	94.584	0.94584		4022	0.9459	0.9459	0.9459	0.9458	0.9457
4017	94.548	0.94548		4017	0.9456	0.9456	0.9455	0.9454	0.9453
4012	94.502	0.94502		4012	0.9452	0.9451	0.945	0.9449	0.9449
4007	94.46	0.9446		4007	0.9448	0.9447	0.9446	0.9445	0.9444
4002	94.42	0.9442		4002	0.9444	0.9443	0.9442	0.9441	0.944
3997	94.374	0.94374		3997	0.9439	0.9438	0.9437	0.9437	0.9436
3992	94.332	0.94332		3992	0.9435	0.9434	0.9433	0.9432	0.9432
3987	94.282	0.94282		3987	0.9431	0.943	0.9428	0.9427	0.9425
3982	94.226	0.94226		3982	0.9425	0.9424	0.9423	0.9421	0.942
3977	94.166	0.94166		3977	0.9418	0.9418	0.9417	0.9416	0.9414
3972	94.116	0.94116		3972	0.9413	0.9412	0.9411	0.9411	0.9411
3967	94.1	0.941		3967	0.941	0.941	0.941	0.941	0.941
3962	94.092	0.94092		3962	0.941	0.9409	0.9409	0.9409	0.9409
3957	94.084	0.94084		3957	0.9409	0.9409	0.9408	0.9408	0.9408
3952	94.088	0.94088		3952	0.9408	0.9408	0.9409	0.9409	0.941
3947	94.108	0.94108		3947	0.941	0.9411	0.9411	0.9411	0.9411
3942	94.128	0.94128		3942	0.9412	0.9412	0.9413	0.9413	0.9414
3937	94.148	0.94148		3937	0.9414	0.9415	0.9415	0.9415	0.9415
3932	94.168	0.94168		3932	0.9416	0.9416	0.9417	0.9417	0.9418
3927	94.19	0.9419		3927	0.9418	0.9418	0.9418	0.942	0.9421
3922	94.24	0.9424		3922	0.9421	0.9423	0.9424	0.9425	0.9427
3917	94.298	0.94298		3917	0.9428	0.9428	0.943	0.9431	0.9432
3912	94.35	0.9435		3912	0.9433	0.9434	0.9435	0.9436	0.9437
3907	94.408	0.94408		3907	0.9438	0.944	0.9441	0.9442	0.9443
3902	94.456	0.94456		3902	0.9444	0.9445	0.9446	0.9446	0.9447
3897	94.482	0.94482		3897	0.9447	0.9448	0.9448	0.9449	0.9449
3892	94.508	0.94508		3892	0.945	0.945	0.9451	0.9451	0.9452
3887	94.532	0.94532		3887	0.9452	0.9453	0.9453	0.9454	0.9454
3882	94.556	0.94556		3882	0.9455	0.9455	0.9456	0.9456	0.9456
3877	94.542	0.94542		3877	0.9455	0.9455	0.9454	0.9454	0.9453
3872	94.522	0.94522		3872	0.9453	0.9452	0.9452	0.9452	0.9452
3867	94.502	0.94502		3867	0.9451	0.9451	0.945	0.945	0.9449
3862	94.482	0.94482		3862	0.9449	0.9448	0.9448	0.9448	0.9448
3857	94.47	0.9447		3857	0.9447	0.9447	0.9447	0.9447	0.9447
3852	94.48	0.9448		3852	0.9448	0.9448	0.9448	0.9448	0.9448
3847	94.488	0.94488		3847	0.9448	0.9449	0.9449	0.9449	0.9449
3842	94.492	0.94492		3842	0.9449	0.9449	0.9449	0.9449	0.945
3837	94.5	0.945		3837	0.945	0.945	0.945	0.945	0.945
3832	94.516	0.94516		3832	0.9451	0.9451	0.9451	0.9452	0.9453
3827	94.572	0.94572		3827	0.9454	0.9456	0.9457	0.9459	0.946
3822	94.642	0.94642		3822	0.9462	0.9463	0.9464	0.9465	0.9467
3817	94.712	0.94712		3817	0.9468	0.947	0.9471	0.9473	0.9474
3812	94.784	0.94784		3812	0.9475	0.9477	0.9478	0.948	0.9482
3807	94.862	0.94862		3807	0.9483	0.9485	0.9486	0.9488	0.9489
3802	94.932	0.94932		3802	0.9491	0.9492	0.9493	0.9494	0.9496
3797	94.998	0.94998		3797	0.9497	0.9499	0.95	0.9501	0.9502
3792	95.06	0.9506		3792	0.9504	0.9505	0.9506	0.9507	0.9508
3787	95.118	0.95118		3787	0.9509	0.9511	0.9512	0.9513	0.9514
3782	95.174	0.95174		3782	0.9515	0.9516	0.9518	0.9518	0.952
3777	95.23	0.9523		3777	0.9521	0.9521	0.9523	0.9525	0.9525
3772	95.29	0.9529		3772	0.9527	0.9528	0.9528	0.953	0.9532
3767	95.348	0.95348		3767	0.9533	0.9534	0.9535	0.9536	0.9536
3762	95.368	0.95368		3762	0.9536	0.9536	0.9537	0.9537	0.9538
3757	95.384	0.95384		3757	0.9538	0.9538	0.9538	0.9539	0.9539
3752	95.406	0.95406		3752	0.954	0.954	0.9541	0.9541	0.9541
3747	95.422	0.95422		3747	0.9541	0.9542	0.9542	0.9543	0.9543
3742	95.438	0.95438		3742	0.9543	0.9543	0.9544	0.9544	0.9545
3737	95.454	0.95454		3737	0.9545	0.9545	0.9545	0.9546	0.9546
3732	95.472	0.95472		3732	0.9547	0.9547	0.9547	0.9547	0.9548
3727	95.492	0.95492		3727	0.9548	0.9549	0.9549	0.955	0.955
3722	95.508	0.95508		3722	0.955	0.955	0.9551	0.9551	0.9552
3717	95.524	0.95524		3717	0.9552	0.9552	0.9552	0.9553	0.9553
3712	95.542	0.95542		3712	0.9554	0.9554	0.9554	0.9554	0.9555
3707	95.558	0.95558		3707	0.9555	0.9556	0.9556	0.9556	0.9556
3702	95.578	0.95578		3702	0.9557	0.9557	0.9558	0.9558	0.9559
3697	95.598	0.95598		3697	0.9559	0.956	0.956	0.956	0.956
3692	95.618	0.95618		3692	0.9561	0.9561	0.9562	0.9562	0.9563
3687	95.634	0.95634		3687	0.9563	0.9563	0.9563	0.9564	0.9564
3682	95.656	0.95656		3682	0.9565	0.9565	0.9566	0.9566	0.9566
3677	95.672	0.95672		3677	0.9566	0.9567	0.9567	0.9568	0.9568
3672	95.692	0.95692		3672	0.9568	0.9568	0.957	0.957	0.957
3667	95.708	0.95708		3667	0.957	0.9571	0.9571	0.9571	0.9571
3662	95.736	0.95736		3662	0.9573	0.9573	0.9574	0.9574	0.9574
3657	95.748	0.95748		3657	0.9574	0.9575	0.9575	0.9575	0.9575
3652	95.776	0.95776		3652	0.9577	0.9577	0.9578	0.9578	0.9578
3647	95.788	0.95788		3647	0.9578	0.9578	0.9578	0.958	0.958
3642	95.818	0.95818		3642	0.9581	0.9581	0.9582	0.9582	0.9583
3637	95.834	0.95834		3637	0.9583	0.9583	0.9583	0.9584	0.9584
3632	95.858	0.95858		3632	0.9585	0.9585	0.9586	0.9586	0.9587
3627	95.874	0.95874		3627	0.9587	0.9587	0.9587	0.9588	0.9588
3622	95.892	0.95892		3622	0.9589	0.9589	0.9589	0.9589	0.959
3617	95.904	0.95904		3617	0.959	0.959	0.959	0.9591	0.9591
3612	95.916	0.95916		3612	0.9591	0.9591	0.9592	0.9592	0.9592
3607	95.912	0.95912		3607	0.9592	0.9592	0.9591	0.9591	0.959
3602	95.886	0.95886		3602	0.959	0.9589	0.9589	0.9588	0.9587
3597	95.852	0.95852		3597	0.9586	0.9586	0.9585	0.9585	0.9584
3592	95.828	0.95828		3592	0.9584	0.9583	0.9583	0.9582	0.9582
3587	95.79	0.9579		3587	0.9581	0.958	0.9578	0.9578	0.9578
3582	95.764	0.95764		3582	0.9578	0.9577	0.9577	0.9575	0.9575
3577	95.736	0.95736		3577	0.9575	0.9574	0.9573	0.9573	0.9573
3572	95.714	0.95714		3572	0.9573	0.9571	0.9571	0.9571	0.9571
3567	95.696	0.95696		3567	0.957	0.957	0.957	0.957	0.9568
3562	95.68	0.9568		3562	0.9568	0.9568	0.9568	0.9568	0.9568
3557	95.662	0.95662		3557	0.9567	0.9567	0.9566	0.9566	0.9565
3552	95.646	0.95646		3552	0.9565	0.9565	0.9565	0.9564	0.9564
3547	95.628	0.95628		3547	0.9563	0.9563	0.9563	0.9563	0.9562
3542	95.612	0.95612		3542	0.9562	0.9561	0.9561	0.9561	0.9561
3537	95.598	0.95598		3537	0.956	0.956	0.956	0.956	0.9559
3532	95.59	0.9559		3532	0.9559	0.9559	0.9559	0.9559	0.9559
3527	95.578	0.95578		3527	0.9558	0.9558	0.9558	0.9558	0.9557
3522	95.566	0.95566		3522	0.9557	0.9557	0.9557	0.9556	0.9556
3517	95.558	0.95558		3517	0.9556	0.9556	0.9556	0.9556	0.9555
3512	95.546	0.95546		3512	0.9555	0.9555	0.9555	0.9554	0.9554
3507	95.528	0.95528		3507	0.9553	0.9553	0.9553	0.9553	0.9552
3502	95.516	0.95516		3502	0.9552	0.9552	0.9552	0.9551	0.9551
3497	95.502	0.95502		3497	0.9551	0.9551	0.955	0.955	0.9549
3492	95.478	0.95478		3492	0.9549	0.9548	0.9548	0.9547	0.9547
3487	95.452	0.95452		3487	0.9546	0.9546	0.9545	0.9545	0.9544
3482	95.422	0.95422		3482	0.9544	0.9543	0.9542	0.9541	0.9541
3477	95.392	0.95392		3477	0.954	0.954	0.9539	0.9539	0.9538
3472	95.362	0.95362		3472	0.9538	0.9537	0.9536	0.9535	0.9535
3467	95.332	0.95332		3467	0.9534	0.9534	0.9533	0.9533	0.9532
3462	95.298	0.95298		3462	0.9532	0.9531	0.953	0.9528	0.9528
3457	95.27	0.9527		3457	0.9528	0.9528	0.9527	0.9527	0.9525
3452	95.25	0.9525		3452	0.9525	0.9525	0.9525	0.9525	0.9525
3447	95.234	0.95234		3447	0.9524	0.9524	0.9523	0.9523	0.9523
3442	95.214	0.95214		3442	0.9523	0.9521	0.9521	0.9521	0.9521
3437	95.196	0.95196		3437	0.952	0.952	0.952	0.952	0.9518
3432	95.18	0.9518		3432	0.9518	0.9518	0.9518	0.9518	0.9518
3427	95.162	0.95162		3427	0.9517	0.9517	0.9516	0.9516	0.9515
3422	95.15	0.9515		3422	0.9515	0.9515	0.9515	0.9515	0.9515
3417	95.14	0.9514		3417	0.9514	0.9514	0.9514	0.9514	0.9514
3412	95.136	0.95136		3412	0.9514	0.9514	0.9514	0.9513	0.9513
3407	95.13	0.9513		3407	0.9513	0.9513	0.9513	0.9513	0.9513
3402	95.126	0.95126		3402	0.9513	0.9513	0.9513	0.9512	0.9512
3397	95.108	0.95108		3397	0.9512	0.9512	0.9511	0.951	0.9509
3392	95.07	0.9507		3392	0.9509	0.9508	0.9507	0.9506	0.9505
3387	95.028	0.95028		3387	0.9504	0.9504	0.9503	0.9502	0.9501
3382	94.99	0.9499		3382	0.9501	0.95	0.9499	0.9498	0.9497
3377	94.948	0.94948		3377	0.9496	0.9496	0.9495	0.9494	0.9493
3372	94.91	0.9491		3372	0.9493	0.9492	0.9491	0.949	0.9489
3367	94.842	0.94842		3367	0.9487	0.9486	0.9484	0.9483	0.9481
3362	94.768	0.94768		3362	0.948	0.9478	0.9477	0.9475	0.9474
3357	94.688	0.94688		3357	0.9471	0.9471	0.9468	0.9468	0.9466
3352	94.626	0.94626		3352	0.9465	0.9464	0.9463	0.9461	0.946
3347	94.552	0.94552		3347	0.9458	0.9457	0.9455	0.9454	0.9452
3342	94.482	0.94482		3342	0.9451	0.9449	0.9448	0.9447	0.9446
3337	94.438	0.94438		3337	0.9445	0.9445	0.9444	0.9443	0.9442
3332	94.402	0.94402		3332	0.9442	0.9441	0.944	0.9439	0.9439
3327	94.36	0.9436		3327	0.9438	0.9437	0.9436	0.9435	0.9434
3322	94.322	0.94322		3322	0.9434	0.9433	0.9432	0.9431	0.9431
3317	94.282	0.94282		3317	0.943	0.9428	0.9428	0.9428	0.9427
3312	94.254	0.94254		3312	0.9427	0.9425	0.9425	0.9425	0.9425
3307	94.238	0.94238		3307	0.9424	0.9424	0.9424	0.9424	0.9423
3302	94.214	0.94214		3302	0.9423	0.9421	0.9421	0.9421	0.9421
3297	94.188	0.94188		3297	0.942	0.942	0.9418	0.9418	0.9418
3292	94.168	0.94168		3292	0.9418	0.9417	0.9417	0.9416	0.9416
3287	94.152	0.94152		3287	0.9416	0.9416	0.9415	0.9415	0.9414
3282	94.128	0.94128		3282	0.9414	0.9413	0.9413	0.9412	0.9412
3277	94.112	0.94112		3277	0.9412	0.9412	0.9411	0.9411	0.941
3272	94.096	0.94096		3272	0.941	0.941	0.941	0.9409	0.9409
3267	94.082	0.94082		3267	0.9409	0.9409	0.9408	0.9408	0.9407
3262	94.066	0.94066		3262	0.9407	0.9407	0.9407	0.9406	0.9406
3257	94.052	0.94052		3257	0.9406	0.9406	0.9405	0.9405	0.9404
3252	94.034	0.94034		3252	0.9404	0.9404	0.9404	0.9403	0.9402
3247	93.994	0.93994		3247	0.9401	0.94	0.9399	0.9399	0.9398
3242	93.972	0.93972		3242	0.9397	0.9396	0.9395	0.9394	0.9404
3237	93.882	0.93882		3237	0.9391	0.939	0.9388	0.9387	0.9385
3232	93.806	0.93806		3232	0.9384	0.9382	0.9381	0.9378	0.9378
3227	93.728	0.93728		3227	0.9375	0.9375	0.9373	0.9371	0.937
3222	93.648	0.93648		3222	0.9368	0.9367	0.9365	0.9363	0.9361
3217	93.544	0.93544		3217	0.9359	0.9357	0.9354	0.9352	0.935
3212	93.43	0.9343		3212	0.9348	0.9346	0.9344	0.934	0.9337
3207	93.228	0.93228		3207	0.9332	0.9328	0.9323	0.9318	0.9313
3202	92.996	0.92996		3202	0.9309	0.9304	0.93	0.9295	0.929
3197	92.758	0.92758		3197	0.9285	0.9281	0.9275	0.9271	0.9267
3192	92.528	0.92528		3192	0.9262	0.9257	0.9253	0.9248	0.9244
3187	92.292	0.92292		3187	0.9239	0.9234	0.9228	0.9225	0.922
3182	92.062	0.92062		3182	0.9216	0.9211	0.9206	0.9201	0.9197
3177	91.824	0.91824		3177	0.9192	0.9187	0.9182	0.9178	0.9173
3172	91.576	0.91576		3172	0.9168	0.9163	0.9158	0.9152	0.9147
3167	91.288	0.91288		3167	0.9141	0.9136	0.913	0.9124	0.9113
3162	90.812	0.90812		3162	0.9103	0.9092	0.9081	0.907	0.906
3157	90.268	0.90268		3157	0.9049	0.9038	0.9027	0.9017	0.9003
3152	89.61	0.8961		3152	0.8989	0.8975	0.8961	0.8947	0.8933
3147	88.908	0.88908		3147	0.8918	0.8905	0.8891	0.8877	0.8863
3142	88.21	0.8821		3142	0.8849	0.8835	0.8821	0.8807	0.8793
3137	87.502	0.87502		3137	0.8778	0.8765	0.8751	0.8737	0.872
3132	86.686	0.86686		3132	0.8704	0.8686	0.8668	0.8651	0.8634
3127	85.626	0.85626		3127	0.8616	0.8599	0.8566	0.8533	0.8499
3122	84.054	0.84054		3122	0.8465	0.8435	0.8405	0.8375	0.8347
3117	82.454	0.82454		3117	0.8318	0.829	0.8249	0.8208	0.8162
3112	80.138	0.80138		3112	0.8118	0.8068	0.8018	0.7961	0.7904
3107	76.592	0.76592		3107	0.7824	0.7744	0.7668	0.7593	0.7467
3102	58.34	0.5834		3102	0.7341	0.6511	0.5683	0.5106	0.4529
3097	36.068	0.36068		3097	0.4016	0.3504	0.3504	0.35	0.351
3092	35.556	0.35556		3092	0.3516	0.3534	0.355	0.3576	0.3602
3087	36.762	0.36762		3087	0.3627	0.3653	0.3677	0.37	0.3724
3082	38.124	0.38124		3082	0.3748	0.3776	0.3804	0.3846	0.3888
3077	45.468	0.45468		3077	0.4104	0.4321	0.4545	0.477	0.4994
3072	56.682	0.56682		3072	0.5219	0.5443	0.5668	0.5893	0.6118
3067	61.226	0.61226		3067	0.6155	0.6172	0.615	0.6109	0.6027
3062	57.828	0.57828		3062	0.5946	0.5864	0.5783	0.5701	0.562
3057	54.882	0.54882		3057	0.5538	0.5457	0.5458	0.5459	0.5529
3052	57.738	0.57738		3052	0.5607	0.569	0.5774	0.5857	0.5941
3047	61.904	0.61904		3047	0.6024	0.6107	0.619	0.6274	0.6357
3042	64.812	0.64812		3042	0.6441	0.6471	0.6501	0.6499	0.6494
3037	58.248	0.58248		3037	0.63	0.6102	0.5838	0.5574	0.531
3032	45.186	0.45186		3032	0.5046	0.4782	0.4519	0.4255	0.3991
3027	31.95	0.3195		3027	0.3727	0.3462	0.3199	0.2735	0.2852
3022	29.43	0.2943		3022	0.2769	0.2856	0.2943	0.303	0.3117
3017	33.778	0.33778		3017	0.3204	0.3291	0.3378	0.3464	0.3552
3012	37.986	0.37986		3012	0.3639	0.3726	0.3812	0.3876	0.394
3007	36.068	0.36068		3007	0.3832	0.3726	0.35	0.3926	0.305
3002	26.284	0.26284		3002	0.2825	0.2699	0.2573	0.2539	0.2506
2997	21.274	0.21274		2997	0.2391	0.2276	0.2129	0.1983	0.1858
2992	12.604	0.12604		2992	0.1733	0.1527	0.1321	0.1014	0.0707
2987	1.986	0.01986		2987	0.0425	0.0145	0.0143	0.0141	0.0139
2982	1.472	0.01472		2982	0.0137	0.0137	0.0172	0.0142	0.0148
2977	2.932	0.02932		2977	0.0196	0.0245	0.0293	0.0342	0.039
2972	5.356	0.05356		2972	0.0439	0.0487	0.0536	0.0584	0.0632
2967	7.762	0.07762		2967	0.068	0.0729	0.0777	0.0853	0.0842
2962	8.264	0.08264		2962	0.0861	0.0859	0.0858	0.0804	0.075
2957	4.434	0.04434		2957	0.064	0.053	0.043	0.033	0.0287
2952	1.978	0.01978		2952	0.0245	0.0218	0.0194	0.0175	0.0157
2947	1.256	0.01256		2947	0.0146	0.0135	0.0126	0.0116	0.0105
2942	0.928	0.00928		2942	0.0096	0.0094	0.0093	0.0091	0.009
2937	0.854	0.00854		2937	0.0088	0.0087	0.0085	0.0084	0.0083
2932	0.806	0.00806		2932	0.0082	0.0081	0.008	0.008	0.008
2927	0.812	0.00812		2927	0.0081	0.0081	0.0081	0.0081	0.0082
2922	0.858	0.00858		2922	0.0083	0.0084	0.0086	0.0087	0.0089
2917	0.946	0.00946		2917	0.009	0.0092	0.0094	0.0097	0.01
2912	1.116	0.01116		2912	0.0104	0.0108	0.0112	0.0115	0.0119
2907	1.32	0.0132		2907	0.0123	0.0127	0.0132	0.0137	0.0141
2902	1.566	0.01566		2902	0.0146	0.0151	0.0157	0.0162	0.0167
2897	1.866	0.01866		2897	0.0173	0.0179	0.0185	0.0194	0.0202
2892	2.27	0.0227		2892	0.0209	0.0218	0.0228	0.0235	0.0245
2887	3.098	0.03098		2887	0.0263	0.0281	0.0306	0.0331	0.0368
2882	4.83	0.0483		2882	0.0407	0.0445	0.0483	0.0521	0.0559
2877	5.576	0.05576		2877	0.0576	0.0593	0.0566	0.054	0.0513
2872	4.322	0.04322		2872	0.0486	0.0459	0.0432	0.0405	0.0379
2867	3.552	0.03552		2867	0.0352	0.0325	0.0322	0.032	0.0457
2862	7.32	0.0732		2862	0.0594	0.0693	0.0792	0.0791	0.079
2857	7.046	0.07046		2857	0.0769	0.0748	0.0708	0.0669	0.0629
2852	5.094	0.05094		2852	0.0589	0.0549	0.051	0.0469	0.043
2847	3.944	0.03944		2847	0.0392	0.0354	0.0354	0.0354	0.0518
2842	10.192	0.10192		2842	0.0683	0.0851	0.1019	0.1187	0.1356
2837	18.6	0.186		2837	0.1524	0.1692	0.186	0.2028	0.2196
2832	28.052	0.28052		2832	0.2364	0.2534	0.2705	0.3043	0.338
2827	38.606	0.38606		2827	0.3574	0.3766	0.3868	0.3971	0.4124
2822	49.23	0.4923		2822	0.4278	0.4688	0.5099	0.5216	0.5334
2817	56.818	0.56818		2817	0.5447	0.556	0.5672	0.5785	0.5945
2812	62.97	0.6297		2812	0.6106	0.6193	0.628	0.6395	0.6511
2807	71.134	0.71134		2807	0.6701	0.6893	0.7134	0.7375	0.7464
2802	77.078	0.77078		2802	0.7554	0.7635	0.7715	0.7784	0.7851
2797	79.902	0.79902		2797	0.7908	0.7965	0.7996	0.8026	0.8056
2792	81.296	0.81296		2792	0.8085	0.811	0.8135	0.8151	0.8167
2787	82.182	0.82182		2787	0.8183	0.82	0.8218	0.8236	0.8254
2782	83.054	0.83054		2782	0.8273	0.829	0.8308	0.8321	0.8335
2777	83.676	0.83676		2777	0.8346	0.8357	0.8367	0.8378	0.839
2772	84.28	0.8428		2772	0.8402	0.8415	0.8428	0.8441	0.8454
2767	84.796	0.84796		2767	0.8463	0.8471	0.848	0.8488	0.8496
2762	85.114	0.85114		2762	0.8504	0.8509	0.8514	0.8515	0.8515
2757	85.032	0.85032		2757	0.8515	0.8514	0.8506	0.8498	0.8483
2752	84.24	0.8424		2752	0.8468	0.8448	0.8428	0.8401	0.8375
2747	82.776	0.82776		2747	0.8343	0.8311	0.8278	0.8245	0.8211
2742	80.922	0.80922		2742	0.8178	0.8144	0.8111	0.8046	0.7982
2737	77.802	0.77802		2737	0.7939	0.7897	0.7864	0.7832	0.7369
2732	69.1	0.691		2732	0.6908	0.6905	0.6901	0.6901	0.6935
2727	71.314	0.71314		2727	0.6925	0.6949	0.7096	0.7244	0.7443
2722	80.402	0.80402		2722	0.7642	0.7841	0.804	0.8239	0.8439
2717	86.742	0.86742		2717	0.8548	0.8658	0.8692	0.8725	0.8748
2712	88.036	0.88036		2712	0.877	0.8788	0.8806	0.882	0.8834
2707	88.626	0.88626		2707	0.8844	0.8854	0.8863	0.8871	0.8881
2702	89.068	0.89068		2702	0.889	0.8898	0.8907	0.8915	0.8924
2697	89.368	0.89368		2697	0.8928	0.8934	0.8937	0.8941	0.8944
2692	89.52	0.8952		2692	0.8947	0.895	0.8953	0.8954	0.8956
2687	89.528	0.89528		2687	0.8956	0.8956	0.8954	0.8952	0.8946
2682	88.98	0.8898		2682	0.894	0.8923	0.8907	0.8875	0.8845
2677	87.302	0.87302		2677	0.8809	0.8773	0.8724	0.8675	0.867
2672	86.636	0.86636		2672	0.8665	0.8664	0.8664	0.8663	0.8662
2667	87.234	0.87234		2667	0.8675	0.8691	0.872	0.875	0.8781
2662	88.862	0.88862		2662	0.8812	0.8846	0.8881	0.8924	0.8968
2657	90.444	0.90444		2657	0.8995	0.9023	0.9047	0.9071	0.9086
2652	91.158	0.91158		2652	0.9101	0.9108	0.9116	0.9123	0.9131
2647	91.482	0.91482		2647	0.9137	0.9143	0.9148	0.9154	0.9159
2642	91.686	0.91686		2642	0.9164	0.9166	0.9168	0.9171	0.9174
2637	91.746	0.91746		2637	0.9175	0.9175	0.9175	0.9175	0.9173
2632	91.37	0.9137		2632	0.9171	0.9154	0.9136	0.912	0.9104
2627	90.54	0.9054		2627	0.9088	0.9071	0.9054	0.9036	0.9021
2622	89.966	0.89966		2622	0.9009	0.9003	0.8997	0.899	0.8984
2617	89.916	0.89916		2617	0.8984	0.8984	0.899	0.8997	0.9003
2612	90.248	0.90248		2612	0.901	0.9017	0.9024	0.9032	0.9041
2607	90.662	0.90662		2607	0.9049	0.9058	0.9066	0.9075	0.9083
2602	91.066	0.91066		2602	0.9091	0.9099	0.9108	0.9114	0.9121
2597	91.376	0.91376		2597	0.9127	0.9133	0.9138	0.9144	0.9146
2592	91.538	0.91538		2592	0.9149	0.9151	0.9154	0.9156	0.9159
2587	91.64	0.9164		2587	0.9161	0.9164	0.9165	0.9165	0.9165
2582	91.62	0.9162		2582	0.9165	0.9164	0.9163	0.916	0.9158
2577	91.498	0.91498		2577	0.9155	0.9153	0.915	0.9147	0.9144
2572	91.396	0.91396		2572	0.9142	0.9139	0.9139	0.9138	0.914
2567	91.508	0.91508		2567	0.9142	0.9145	0.915	0.9156	0.9161
2562	91.796	0.91796		2562	0.9166	0.9171	0.9178	0.9187	0.9196
2557	92.228	0.92228		2557	0.9205	0.9214	0.9223	0.9232	0.924
2552	92.636	0.92636		2552	0.9249	0.9256	0.9264	0.9271	0.9278
2547	92.88	0.9288		2547	0.9283	0.9288	0.9289	0.929	0.929
2542	92.86	0.9286		2542	0.929	0.9288	0.9287	0.9284	0.9281
2537	92.688	0.92688		2537	0.9277	0.9273	0.9268	0.9264	0.9262
2532	92.61	0.9261		2532	0.9261	0.9261	0.9261	0.9261	0.9261
2527	92.63	0.9263		2527	0.9261	0.9261	0.9262	0.9264	0.9267
2522	92.772	0.92772		2522	0.9271	0.9274	0.9277	0.928	0.9284
2517	93.07	0.9307		2517	0.9291	0.9299	0.9307	0.9315	0.9323
2512	93.446	0.93446		2512	0.9331	0.9338	0.9346	0.9351	0.9357
2507	93.69	0.9369		2507	0.9361	0.9366	0.937	0.9374	0.9374
2502	93.764	0.93764		2502	0.9375	0.9375	0.9377	0.9377	0.9378
2497	93.732	0.93732		2497	0.9378	0.938	0.9375	0.9371	0.9362
2492	93.402	0.93402		2492	0.9354	0.9347	0.934	0.9333	0.9327
2487	93.09	0.9309		2487	0.9321	0.9315	0.9309	0.9303	0.9297
2482	92.806	0.92806		2482	0.9291	0.9286	0.9281	0.9275	0.927
2477	92.58	0.9258		2477	0.9265	0.926	0.9257	0.9255	0.9253
2472	92.492	0.92492		2472	0.9251	0.9249	0.9249	0.9248	0.9249
2467	92.554	0.92554		2467	0.9251	0.9253	0.9255	0.9258	0.926
2462	92.664	0.92664		2462	0.9262	0.9264	0.9267	0.9268	0.9271
2457	92.778	0.92778		2457	0.9273	0.9275	0.9278	0.928	0.9283
2452	92.97	0.9297		2452	0.9287	0.9292	0.9297	0.9302	0.9307
2447	93.216	0.93216		2447	0.9312	0.9318	0.9321	0.9327	0.933
2442	93.402	0.93402		2442	0.9334	0.9337	0.934	0.9343	0.9347
2437	93.564	0.93564		2437	0.935	0.9353	0.9356	0.936	0.9363
2432	93.69	0.9369		2432	0.9366	0.9368	0.937	0.937	0.9371
2427	93.708	0.93708		2427	0.9371	0.9371	0.9371	0.9371	0.937
2422	93.684	0.93684		2422	0.937	0.9368	0.9368	0.9368	0.9368
2417	93.66	0.9366		2417	0.9367	0.9367	0.9366	0.9366	0.9364
2412	93.606	0.93606		2412	0.9363	0.9362	0.9361	0.9359	0.9358
2407	93.546	0.93546		2407	0.9357	0.9356	0.9355	0.9354	0.9351
2402	93.45	0.9345		2402	0.9349	0.9347	0.9345	0.9343	0.9341
2397	93.332	0.93332		2397	0.9338	0.9336	0.9333	0.9331	0.9328
2392	93.2	0.932		2392	0.9325	0.9323	0.932	0.9317	0.9315
2387	93.088	0.93088		2387	0.9313	0.9311	0.9309	0.9307	0.9304
2382	92.992	0.92992		2382	0.9302	0.93	0.9299	0.9298	0.9297
2377	92.938	0.92938		2377	0.9296	0.9295	0.9294	0.9293	0.9291
2372	92.888	0.92888		2372	0.929	0.9289	0.9288	0.9288	0.9289
2367	92.902	0.92902		2367	0.9289	0.929	0.929	0.9291	0.9291
2362	92.932	0.92932		2362	0.9292	0.9292	0.9293	0.9294	0.9295
2357	93.012	0.93012		2357	0.9296	0.9298	0.9301	0.9304	0.9307
2352	93.156	0.93156		2352	0.931	0.9313	0.9316	0.9318	0.9321
2347	93.316	0.93316		2347	0.9325	0.9328	0.9331	0.9335	0.9339
2342	93.512	0.93512		2342	0.9343	0.9347	0.9351	0.9355	0.936
2337	93.712	0.93712		2337	0.9364	0.9368	0.9371	0.9375	0.9378
2332	93.882	0.93882		2332	0.9383	0.9385	0.9388	0.9391	0.9394
2327	94.018	0.94018		2327	0.9396	0.9399	0.9402	0.9405	0.9407
2322	94.148	0.94148		2322	0.941	0.9412	0.9415	0.9417	0.942
2317	94.258	0.94258		2317	0.9421	0.9424	0.9425	0.9428	0.9431
2312	94.38	0.9438		2312	0.9434	0.9436	0.9438	0.944	0.9442
2307	94.428	0.94428		2307	0.9442	0.9443	0.9443	0.9443	0.9443
2302	94.446	0.94446		2302	0.9444	0.9444	0.9445	0.9445	0.9445
2297	94.406	0.94406		2297	0.9444	0.9443	0.9441	0.9439	0.9436
2292	94.298	0.94298		2292	0.9434	0.9432	0.943	0.9428	0.9425
2287	94.196	0.94196		2287	0.9424	0.9421	0.942	0.9418	0.9415
2282	94.08	0.9408		2282	0.9413	0.9411	0.9409	0.9405	0.9402
2277	93.924	0.93924		2277	0.9399	0.9396	0.9392	0.9389	0.9386
2272	93.758	0.93758		2272	0.9383	0.9378	0.9375	0.9373	0.937
2267	93.602	0.93602		2267	0.9366	0.9363	0.936	0.9357	0.9355
2262	93.496	0.93496		2262	0.9353	0.9351	0.935	0.9348	0.9346
2257	93.404	0.93404		2257	0.9344	0.9342	0.934	0.9339	0.9337
2252	93.3	0.933		2252	0.9335	0.9332	0.933	0.9328	0.9325
2247	93.198	0.93198		2247	0.9324	0.9321	0.932	0.9318	0.9316
2242	93.14	0.9314		2242	0.9314	0.9313	0.9313	0.9314	0.9316
2237	93.214	0.93214		2237	0.9318	0.932	0.9321	0.9323	0.9325
2232	93.32	0.9332		2232	0.9328	0.933	0.9332	0.9334	0.9336
2227	93.428	0.93428		2227	0.9338	0.9341	0.9343	0.9345	0.9347
2222	93.542	0.93542		2222	0.935	0.9352	0.9354	0.9356	0.9359
2217	93.636	0.93636		2217	0.9361	0.9363	0.9364	0.9365	0.9365
2212	93.668	0.93668		2212	0.9366	0.9366	0.9367	0.9367	0.9368
2207	93.68	0.9368		2207	0.9368	0.9368	0.9368	0.9368	0.9368
2202	93.706	0.93706		2202	0.937	0.937	0.9371	0.9371	0.9371
2197	93.73	0.9373		2197	0.9371	0.9373	0.9373	0.9374	0.9374
2192	93.754	0.93754		2192	0.9375	0.9375	0.9375	0.9375	0.9377
2187	93.774	0.93774		2187	0.9377	0.9377	0.9377	0.9378	0.9378
2182	93.78	0.9378		2182	0.9378	0.9378	0.9378	0.9378	0.9378
2177	93.78	0.9378		2177	0.9378	0.9378	0.9378	0.9378	0.9378
2172	93.802	0.93802		2172	0.938	0.938	0.938	0.938	0.9381
2167	93.822	0.93822		2167	0.9381	0.9382	0.9382	0.9383	0.9383
2162	93.838	0.93838		2162	0.9383	0.9383	0.9384	0.9384	0.9385
2157	93.862	0.93862		2157	0.9385	0.9386	0.9386	0.9387	0.9387
2152	93.878	0.93878		2152	0.9387	0.9387	0.9388	0.9388	0.9389
2147	93.91	0.9391		2147	0.9389	0.939	0.9391	0.9392	0.9393
2142	93.968	0.93968		2142	0.9394	0.9395	0.9397	0.9398	0.94
2137	94.034	0.94034		2137	0.9401	0.9402	0.9403	0.9405	0.9406
2132	94.102	0.94102		2132	0.9408	0.9409	0.941	0.9411	0.9413
2127	94.142	0.94142		2127	0.9413	0.9414	0.9414	0.9415	0.9415
2122	94.16	0.9416		2122	0.9416	0.9416	0.9416	0.9416	0.9416
2117	94.112	0.94112		2117	0.9414	0.9413	0.9411	0.941	0.9408
2112	94.038	0.94038		2112	0.9407	0.9405	0.9404	0.9402	0.9401
2107	93.962	0.93962		2107	0.9399	0.9398	0.9396	0.9395	0.9393
2102	93.88	0.9388		2102	0.9392	0.939	0.9388	0.9386	0.9384
2097	93.768	0.93768		2097	0.9381	0.9378	0.9377	0.9375	0.9373
2092	93.668	0.93668		2092	0.9371	0.9368	0.9367	0.9365	0.9363
2087	93.554	0.93554		2087	0.936	0.9358	0.9355	0.9353	0.9351
2082	93.438	0.93438		2082	0.9349	0.9346	0.9344	0.9341	0.9339
2077	93.332	0.93332		2077	0.9336	0.9334	0.9333	0.9332	0.9331
2072	93.294	0.93294		2072	0.9331	0.933	0.933	0.9328	0.9328
2067	93.27	0.9327		2067	0.9328	0.9328	0.9327	0.9327	0.9325
2062	93.262	0.93262		2062	0.9325	0.9325	0.9327	0.9327	0.9327
2057	93.278	0.93278		2057	0.9327	0.9328	0.9328	0.9328	0.9328
2052	93.28	0.9328		2052	0.9328	0.9328	0.9328	0.9328	0.9328
2047	93.264	0.93264		2047	0.9328	0.9328	0.9327	0.9325	0.9324
2042	93.202	0.93202		2042	0.9323	0.9321	0.9321	0.9318	0.9318
2037	93.128	0.93128		2037	0.9316	0.9315	0.9313	0.9311	0.9309
2032	93.036	0.93036		2032	0.9308	0.9306	0.9304	0.9301	0.9299
2027	92.928	0.92928		2027	0.9297	0.9295	0.9293	0.9291	0.9288
2022	92.806	0.92806		2022	0.9286	0.9283	0.9281	0.9278	0.9275
2017	92.728	0.92728		2017	0.9275	0.9274	0.9273	0.9271	0.9271
2012	92.74	0.9274		2012	0.9271	0.9271	0.9271	0.9275	0.9282
2007	93.018	0.93018		2007	0.9288	0.9295	0.9301	0.9307	0.9318
2002	93.9	0.939		2002	0.9331	0.936	0.939	0.942	0.9449
1997	94.956	0.94956		1997	0.9478	0.9497	0.9499	0.9501	0.9503
1992	95.024	0.95024		1992	0.9504	0.9504	0.9504	0.9501	0.9499
1987	94.912	0.94912		1987	0.9496	0.9494	0.9491	0.9489	0.9486
1982	94.802	0.94802		1982	0.9484	0.9481	0.948	0.9478	0.9478
1977	94.74	0.9474		1977	0.9477	0.9475	0.9474	0.9473	0.9471
1972	94.6	0.946		1972	0.947	0.9465	0.946	0.9455	0.945
1967	94.362	0.94362		1967	0.9446	0.9441	0.9436	0.9431	0.9427
1962	94.132	0.94132		1962	0.9421	0.9418	0.9413	0.9409	0.9405
1957	93.954	0.93954		1957	0.94	0.9396	0.9395	0.9394	0.9392
1952	93.958	0.93958		1952	0.9391	0.9391	0.9395	0.9399	0.9403
1947	94.15	0.9415		1947	0.9407	0.9411	0.9415	0.9418	0.9424
1942	94.384	0.94384		1942	0.9428	0.9434	0.9439	0.9443	0.9448
1937	94.614	0.94614		1937	0.9453	0.9458	0.9462	0.9466	0.9468
1932	94.804	0.94804		1932	0.9473	0.9477	0.948	0.9484	0.9488
1927	94.962	0.94962		1927	0.9491	0.9494	0.9496	0.9499	0.9501
1922	95.082	0.95082		1922	0.9504	0.9506	0.9509	0.9511	0.9511
1917	95.124	0.95124		1917	0.9512	0.9512	0.9512	0.9513	0.9513
1912	95.128	0.95128		1912	0.9514	0.9514	0.9514	0.9512	0.951
1907	95.04	0.9504		1907	0.9508	0.9506	0.9504	0.9502	0.95
1902	94.932	0.94932		1902	0.9498	0.9496	0.9493	0.9491	0.9488
1897	94.796	0.94796		1897	0.9486	0.9484	0.9482	0.9475	0.9471
1892	94.566	0.94566		1892	0.9465	0.9459	0.9456	0.9453	0.945
1887	94.422	0.94422		1887	0.9447	0.9445	0.9442	0.9439	0.9438
1882	94.332	0.94332		1882	0.9436	0.9435	0.9433	0.9432	0.943
1877	94.228	0.94228		1877	0.9428	0.9427	0.9424	0.942	0.9415
1872	94.034	0.94034		1872	0.9411	0.9407	0.9403	0.94	0.9396
1867	93.938	0.93938		1867	0.9427	0.939	0.9387	0.9384	0.9381
1862	93.742	0.93742		1862	0.9378	0.9375	0.9374	0.9373	0.9371
1857	93.742	0.93742		1857	0.9371	0.9373	0.9375	0.9375	0.9377
1852	93.808	0.93808		1852	0.9378	0.938	0.9381	0.9382	0.9383
1847	93.86	0.9386		1847	0.9384	0.9385	0.9386	0.9387	0.9388
1842	93.878	0.93878		1842	0.9389	0.9389	0.9388	0.9387	0.9386
1837	93.828	0.93828		1837	0.9385	0.9384	0.9383	0.9382	0.938
1832	93.73	0.9373		1832	0.9378	0.9375	0.9373	0.9371	0.9368
1827	93.538	0.93538		1827	0.9363	0.9359	0.9354	0.9349	0.9344
1822	93.282	0.93282		1822	0.9339	0.9334	0.9328	0.9323	0.9317
1817	92.95	0.9295		1817	0.9312	0.9304	0.9295	0.9286	0.9278
1812	92.484	0.92484		1812	0.9268	0.9259	0.9249	0.9239	0.9227
1807	91.698	0.91698		1807	0.921	0.9193	0.9175	0.915	0.9121
1802	90.062	0.90062		1802	0.9094	0.9055	0.9012	0.8961	0.8909
1797	87.536	0.87536		1797	0.8861	0.8812	0.8762	0.8699	0.8634
1792	84.22	0.8422		1792	0.8573	0.8475	0.8415	0.8354	0.8293
1787	81.118	0.81118		1787	0.8233	0.8171	0.8111	0.8051	0.7993
1782	79.846	0.79846		1782	0.7985	0.7981	0.7978	0.7984	0.7995
1777	82.726	0.82726		1777	0.8068	0.8164	0.8268	0.8385	0.8478
1772	87.272	0.87272		1772	0.8568	0.8659	0.874	0.8809	0.886
1767	89.582	0.89582		1767	0.8902	0.8931	0.8961	0.8988	0.9009
1762	90.694	0.90694		1762	0.9031	0.9052	0.9073	0.9088	0.9103
1757	91.476	0.91476		1757	0.9118	0.9133	0.9148	0.9162	0.9177
1752	92.174	0.92174		1752	0.9191	0.9205	0.9218	0.923	0.9243
1747	92.734	0.92734		1747	0.9255	0.9266	0.9274	0.9282	0.929
1742	93.086	0.93086		1742	0.9298	0.9304	0.9309	0.9314	0.9318
1737	93.38	0.9338		1737	0.9325	0.933	0.9335	0.9355	0.9345
1732	93.464	0.93464		1732	0.9346	0.9347	0.9347	0.9347	0.9345
1727	93.228	0.93228		1727	0.9342	0.9338	0.9333	0.9312	0.9289
1722	91.562	0.91562		1722	0.9247	0.9198	0.9154	0.9109	0.9073
1717	89.814	0.89814		1717	0.9041	0.9008	0.898	0.8953	0.8925
1712	88.836	0.88836		1712	0.8896	0.8882	0.8887	0.8875	0.8878
1707	89.014	0.89014		1707	0.888	0.8888	0.8901	0.8913	0.8925
1702	89.612	0.89612		1702	0.894	0.8953	0.8964	0.8971	0.8978
1697	89.966	0.89966		1697	0.8985	0.8989	0.8993	0.8996	0.902
1692	89.872	0.89872		1692	0.8998	0.8994	0.8989	0.8985	0.897
1687	88.994	0.88994		1687	0.8951	0.8932	0.8903	0.8871	0.884
1682	86.962	0.86962		1682	0.8805	0.8761	0.8717	0.8654	0.8544
1677	76.712	0.76712		1677	0.805	0.7548	0.7544	0.7606	0.7608
1672	79.25	0.7925		1672	0.7715	0.7821	0.7928	0.8036	0.8125
1667	81.366	0.81366		1667	0.8141	0.8145	0.8133	0.8132	0.8132
1662	80.766	0.80766		1662	0.8125	0.8108	0.8094	0.8055	0.8001
1657	73.008	0.73008		1657	0.7919	0.7764	0.7512	0.6942	0.6367
1652	46.418	0.46418		1652	0.5792	0.5217	0.4642	0.4066	0.3492
1647	17.984	0.17984		1647	0.2917	0.2342	0.1767	0.1192	0.0774
1642	8.584	0.08584		1642	0.0785	0.0755	0.0754	0.0759	0.1239
1637	30.818	0.30818		1637	0.1853	0.2468	0.3082	0.3696	0.431
1632	55.836	0.55836		1632	0.4925	0.5059	0.5423	0.6062	0.6449
1627	71.154	0.71154		1627	0.6808	0.6978	0.7155	0.7269	0.7367
1622	76.012	0.76012		1622	0.7444	0.7519	0.7596	0.768	0.7767
1617	79.566	0.79566		1617	0.7835	0.7903	0.7964	0.8012	0.8069
1612	82.126	0.82126		1612	0.8118	0.8164	0.8217	0.826	0.8304
1607	83.436	0.83436		1607	0.8333	0.8341	0.8349	0.8354	0.8341
1602	83.176	0.83176		1602	0.8357	0.835	0.8328	0.8296	0.8257
1597	81.39	0.8139		1597	0.8215	0.8165	0.8124	0.8096	0.8095
1592	81.104	0.81104		1592	0.81	0.8099	0.8104	0.8115	0.8134
1587	81.956	0.81956		1587	0.8151	0.8168	0.8194	0.822	0.8245
1582	83.268	0.83268		1582	0.827	0.8295	0.8324	0.8356	0.8389
1577	84.922	0.84922		1577	0.8421	0.8454	0.8491	0.8528	0.8567
1572	86.628	0.86628		1572	0.8605	0.8635	0.8665	0.8695	0.8714
1567	87.626	0.87626		1567	0.8732	0.875	0.8765	0.8777	0.8789
1562	88.226	0.88226		1562	0.8801	0.8813	0.8825	0.8833	0.8841
1557	88.642	0.88642		1557	0.8849	0.8857	0.8865	0.8873	0.8877
1552	88.888	0.88888		1552	0.8881	0.8886	0.889	0.8893	0.8894
1547	88.978	0.88978		1547	0.8895	0.8897	0.8898	0.8899	0.89
1542	89.018	0.89018		1542	0.8902	0.8902	0.8902	0.8902	0.8901
1537	88.984	0.88984		1537	0.8901	0.89	0.89	0.8897	0.8894
1532	88.822	0.88822		1532	0.889	0.8886	0.8882	0.8878	0.8875
1527	88.626	0.88626		1527	0.8871	0.8867	0.8863	0.8859	0.8853
1522	88.34	0.8834		1522	0.8847	0.884	0.8834	0.8828	0.8821
1517	88.004	0.88004		1517	0.8815	0.8809	0.8802	0.8793	0.8783
1512	87.518	0.87518		1512	0.8771	0.8762	0.8752	0.8742	0.8732
1507	86.82	0.8682		1507	0.872	0.8701	0.8682	0.8663	0.8644
1502	85.826	0.85826		1502	0.8625	0.8606	0.8587	0.8561	0.8534
1497	84.514	0.84514		1497	0.8507	0.848	0.8453	0.8424	0.8393
1492	82.982	0.82982		1492	0.8363	0.8332	0.8301	0.827	0.8225
1487	80.952	0.80952		1487	0.8183	0.8139	0.8096	0.8051	0.8007
1482	78.512	0.78512		1482	0.7962	0.7918	0.7862	0.7793	0.7721
1477	74.392	0.74392		1477	0.7651	0.755	0.7444	0.7337	0.7214
1472	68.63	0.6863		1472	0.7088	0.6975	0.6861	0.6751	0.664
1467	60.934	0.60934		1467	0.6494	0.6301	0.6073	0.5879	0.572
1462	49.88	0.4988		1462	0.556	0.5384	0.5202	0.5023	0.3771
1457	20.598	0.20598		1457	0.3226	0.268	0.2134	0.1589	0.067
1452	6.176	0.06176		1452	0.0626	0.0619	0.0614	0.0614	0.0615
1447	7.032	0.07032		1447	0.0637	0.0678	0.0714	0.0737	0.075
1442	6.532	0.06532		1442	0.0753	0.074	0.0694	0.0604	0.0475
1437	3.778	0.03778		1437	0.0414	0.0388	0.0344	0.0373	0.037
1432	4.976	0.04976		1432	0.037	0.0425	0.0496	0.0564	0.0633
1427	16.312	0.16312		1427	0.0792	0.1178	0.162	0.2062	0.2504
1422	38.3	0.383		1422	0.2946	0.3388	0.383	0.4272	0.4714
1417	57.094	0.57094		1417	0.5156	0.5556	0.5745	0.5948	0.6142
1412	64.74	0.6474		1412	0.6282	0.639	0.6493	0.6565	0.664
1407	68.764	0.68764		1407	0.6735	0.681	0.6895	0.6958	0.6984
1402	70.272	0.70272		1402	0.7007	0.7022	0.7036	0.7028	0.7043
1397	70.316	0.70316		1397	0.7043	0.7043	0.7036	0.7025	0.7011
1392	69.116	0.69116		1392	0.6992	0.6958	0.6922	0.6882	0.6804
1387	64.552	0.64552		1387	0.6726	0.6603	0.6469	0.6318	0.616
1382	54.438	0.54438		1382	0.5994	0.5798	0.5571	0.5365	0.4491
1377	17.778	0.17778		1377	0.2898	0.1427	0.1451	0.1424	0.1689
1372	28.766	0.28766		1372	0.2084	0.2481	0.2877	0.3273	0.3668
1367	48.56	0.4856		1367	0.4064	0.446	0.4856	0.5252	0.5648
1362	67.472	0.67472		1362	0.6044	0.6425	0.6847	0.7103	0.7317
1357	76.488	0.76488		1357	0.7615	0.7646	0.7653	0.7661	0.7669
1352	77.72	0.7772		1352	0.7681	0.7694	0.7706	0.7831	0.7948
1347	81.208	0.81208		1347	0.8044	0.8114	0.8138	0.8151	0.8157
1342	81.548	0.81548		1342	0.8196	0.8158	0.8153	0.8143	0.8124
1337	79.314	0.79314		1337	0.8094	0.8028	0.7949	0.7843	0.7743
1332	75.49	0.7549		1332	0.7635	0.7558	0.7522	0.7515	0.7515
1327	76.826	0.76826		1327	0.746	0.7557	0.7678	0.7803	0.7915
1322	81.056	0.81056		1322	0.8007	0.8099	0.8132	0.8142	0.8148
1317	79.874	0.79874		1317	0.8151	0.8145	0.8082	0.7915	0.7644
1312	72.682	0.72682		1312	0.7498	0.7405	0.7296	0.7051	0.7091
1307	71.746	0.71746		1307	0.7092	0.7093	0.7143	0.7228	0.7317
1302	77.6	0.776		1302	0.7412	0.7608	0.7783	0.7944	0.8053
1297	80.47	0.8047		1297	0.8083	0.8065	0.8062	0.8036	0.7989
1292	76.878	0.76878		1292	0.7918	0.7841	0.7718	0.7528	0.7434
1287	73.68	0.7368		1287	0.7375	0.7347	0.73	0.7361	0.7457
1282	78.064	0.78064		1282	0.76	0.7707	0.7854	0.7918	0.7953
1277	80.448	0.80448		1277	0.7972	0.7996	0.8018	0.8078	0.816
1272	83.798	0.83798		1272	0.8245	0.8315	0.839	0.8453	0.8496
1267	85.188	0.85188		1267	0.8508	0.8514	0.8517	0.8541	0.8514
1262	84.408	0.84408		1262	0.8504	0.8492	0.8459	0.8404	0.8345
1257	78.676	0.78676		1257	0.8241	0.7975	0.7758	0.7682	0.7682
1252	77.154	0.77154		1252	0.7696	0.7711	0.7718	0.7724	0.7728
1247	74.856	0.74856		1247	0.7721	0.7675	0.7603	0.7275	0.7154
1242	70.586	0.70586		1242	0.7062	0.7076	0.7048	0.7051	0.7056
1237	71.62	0.7162		1237	0.7092	0.7135	0.7178	0.7197	0.7208
1232	72.19	0.7219		1232	0.7217	0.7218	0.7218	0.7217	0.7225
1227	74.424	0.74424		1227	0.724	0.7328	0.7438	0.7548	0.7658
1222	79.864	0.79864		1222	0.7767	0.7876	0.7987	0.8096	0.8206
1217	84.804	0.84804		1217	0.8316	0.8425	0.8535	0.856	0.8566
1212	84.664	0.84664		1212	0.8565	0.8564	0.8504	0.8401	0.8298
1207	79.888	0.79888		1207	0.8195	0.8092	0.7989	0.7886	0.7782
1202	74.722	0.74722		1202	0.7678	0.7575	0.7472	0.7369	0.7267
1197	75.172	0.75172		1197	0.726	0.7255	0.7415	0.7691	0.7965
1192	87.392	0.87392		1192	0.824	0.8515	0.879	0.9033	0.9118
1187	93.236	0.93236		1187	0.925	0.9315	0.9349	0.9351	0.9353
1182	93.702	0.93702		1182	0.9354	0.9361	0.9368	0.9377	0.9391
1177	95.05	0.9505		1177	0.9417	0.9492	0.9528	0.9544	0.9544
1172	95.328	0.95328		1172	0.9544	0.9544	0.954	0.9531	0.9505
1167	93.562	0.93562		1167	0.9471	0.9431	0.9374	0.9296	0.9209
1162	88.866	0.88866		1162	0.9135	0.9062	0.8932	0.8764	0.854
1157	55.264	0.55264		1157	0.7551	0.629	0.5029	0.4371	0.4391
1152	54.252	0.54252		1152	0.4854	0.52	0.5546	0.5766	0.576
1147	48.288	0.48288		1147	0.5603	0.4844	0.4396	0.4418	0.4883
1142	73.646	0.73646		1142	0.5736	0.6589	0.7443	0.8296	0.8759
1137	91.318	0.91318		1137	0.8892	0.9003	0.9157	0.9265	0.9342
1132	95.05	0.9505		1132	0.9412	0.9483	0.9521	0.9548	0.9561
1127	95.682	0.95682		1127	0.9568	0.9573	0.9573	0.956	0.9567
1122	94.764	0.94764		1122	0.9563	0.954	0.9504	0.9461	0.9314
1117	86.03	0.8603		1117	0.9064	0.8814	0.8563	0.8313	0.8261
1112	84.186	0.84186		1112	0.829	0.8316	0.8388	0.8498	0.8601
1107	86.518	0.86518		1107	0.8616	0.8627	0.8642	0.8667	0.8707
1102	92.642	0.92642		1102	0.8978	0.9205	0.9293	0.9381	0.9464
1097	95.402	0.95402		1097	0.951	0.9528	0.9543	0.9556	0.9564
1092	95.672	0.95672		1092	0.9571	0.9574	0.9575	0.9571	0.9545
1087	94.164	0.94164		1087	0.953	0.9491	0.9431	0.9366	0.9264
1082	91.31	0.9131		1082	0.9201	0.9156	0.9123	0.9095	0.908
1077	91.152	0.91152		1077	0.9078	0.904	0.9114	0.9151	0.9193
1072	93.078	0.93078		1072	0.9236	0.9278	0.9312	0.9345	0.9368
1067	93.864	0.93864		1067	0.9388	0.9389	0.9457	0.9363	0.9335
1062	91.06	0.9106		1062	0.9305	0.9249	0.9173	0.9023	0.878
1057	76.158	0.76158		1057	0.8392	0.8004	0.7615	0.7228	0.684
1052	60.07	0.6007		1052	0.6451	0.6064	0.585	0.5848	0.5822
1047	69.794	0.69794		1047	0.6047	0.6512	0.698	0.7446	0.7912
1042	81.446	0.81446		1042	0.8025	0.8087	0.8147	0.8204	0.826
1037	84.81	0.8481		1037	0.8321	0.8394	0.8484	0.8581	0.8625
1032	86.676	0.86676		1032	0.8646	0.8671	0.8673	0.8674	0.8674
1027	79.568	0.79568		1027	0.8606	0.8336	0.7975	0.7614	0.7253
1022	66.428	0.66428		1022	0.6965	0.6815	0.6654	0.6449	0.6331
1017	61.298	0.61298		1017	0.6249	0.6173	0.6105	0.607	0.6052
1012	61.976	0.61976		1012	0.6045	0.6034	0.6032	0.6278	0.6599
1007	75.616	0.75616		1007	0.6919	0.7241	0.7561	0.7883	0.8204
1002	87.188	0.87188		1002	0.8525	0.8751	0.8775	0.8775	0.8768
997	87.224	0.87224		997	0.8758	0.8744	0.8724	0.8703	0.8683
992	86.254	0.86254		992	0.8665	0.8646	0.8627	0.8608	0.8581
987	84.36	0.8436		987	0.8546	0.8503	0.845	0.8364	0.8317
982	83.894	0.83894		982	0.8265	0.8305	0.8318	0.8459	0.86
977	90.124	0.90124		977	0.8741	0.8881	0.9021	0.9163	0.9256
972	93.104	0.93104		972	0.9278	0.93	0.9314	0.9327	0.9333
967	93.22	0.9322		967	0.9333	0.9333	0.9327	0.932	0.9297
962	89.608	0.89608		962	0.927	0.9217	0.9153	0.8787	0.8377
957	72.03	0.7203		957	0.7968	0.7558	0.7149	0.674	0.66
952	74.338	0.74338		952	0.6561	0.7146	0.7483	0.7821	0.8158
947	87.728	0.87728		947	0.8496	0.8727	0.8821	0.8893	0.8927
942	89.798	0.89798		942	0.8948	0.8967	0.8982	0.8997	0.9005
937	90.098	0.90098		937	0.9011	0.9011	0.9012	0.9011	0.9004
932	89.704	0.89704		932	0.8998	0.899	0.8973	0.8955	0.8936
927	87.854	0.87854		927	0.8897	0.8855	0.8798	0.874	0.8637
922	77.608	0.77608		922	0.8499	0.8299	0.7743	0.7201	0.7062
917	49.52	0.4952		917	0.6549	0.5751	0.4952	0.4153	0.3355
912	27.77	0.2777		912	0.2556	0.2264	0.2252	0.3035	0.3778
907	56.382	0.56382		907	0.4521	0.5262	0.6005	0.6201	0.6202
902	50.366	0.50366		902	0.6203	0.5598	0.5029	0.446	0.3893
897	22.364	0.22364		897	0.3324	0.2756	0.2188	0.1619	0.1295
892	2.898	0.02898		892	0.0512	0.0413	0.026	0.0154	0.011
887	0.63	0.0063		887	0.0086	0.0074	0.0067	0.0026	0.0062
882	6.198	0.06198		882	0.009	0.0128	0.0274	0.0886	0.1721
877	40.454	0.40454		877	0.2556	0.3392	0.3957	0.5023	0.5299
872	61.268	0.61268		872	0.5575	0.5851	0.6127	0.6403	0.6678
867	74.476	0.74476		867	0.6934	0.705	0.7519	0.7797	0.7938
862	84.854	0.84854		862	0.8147	0.838	0.8538	0.865	0.8712
857	88.742	0.88742		857	0.8775	0.8832	0.8878	0.8924	0.8962
852	90.682	0.90682		852	0.9	0.9038	0.907	0.9101	0.9132
847	92.016	0.92016		847	0.9159	0.918	0.9202	0.9223	0.9244
842	92.812	0.92812		842	0.926	0.9274	0.9282	0.9291	0.9299
837	93.18	0.9318		837	0.9307	0.9313	0.9318	0.9324	0.9328
832	93.278	0.93278		832	0.9328	0.9328	0.9328	0.9328	0.9327
827	93.188	0.93188		827	0.9325	0.9323	0.9321	0.9316	0.9309
822	92.75	0.9275		822	0.9303	0.9296	0.928	0.9261	0.9235
817	90.864	0.90864		817	0.9195	0.9155	0.9103	0.903	0.8949
812	85.95	0.8595		812	0.8838	0.8725	0.8612	0.8498	0.8302
807	63.076	0.63076		807	0.7978	0.6654	0.6204	0.5635	0.5067
802	33.598	0.33598		802	0.4498	0.3929	0.3359	0.2791	0.2222
797	17.386	0.17386		797	0.1515	0.1508	0.1565	0.189	0.2215
792	31.894	0.31894		792	0.254	0.2865	0.3189	0.3514	0.3839
787	46.04	0.4604		787	0.4164	0.4292	0.4386	0.4574	0.5604
782	82.742	0.82742		782	0.6964	0.8124	0.8336	0.881	0.9137
777	93.666	0.93666		777	0.9263	0.9341	0.9384	0.9412	0.9433
772	94.628	0.94628		772	0.9449	0.9462	0.9462	0.9463	0.9478
767	93.686	0.93686		767	0.9477	0.9464	0.9443	0.9374	0.9085
762	82.448	0.82448		762	0.88	0.8515	0.8231	0.7946	0.7732
757	78.016	0.78016		757	0.7708	0.7728	0.7756	0.786	0.7956
752	89.578	0.89578		752	0.8444	0.8701	0.8958	0.9215	0.9471
747	96.732	0.96732		747	0.9574	0.963	0.9677	0.9721	0.9764
742	98.46	0.9846		742	0.9801	0.9825	0.9849	0.9868	0.9887
737	99.22	0.9922		737	0.9904	0.9913	0.9921	0.9931	0.9941
732	99.492	0.99492		732	0.9945	0.995	0.9951	0.9951	0.9949
727	99.348	0.99348		727	0.9947	0.9945	0.9937	0.9927	0.9918
722	98.786	0.98786		722	0.9907	0.9892	0.9878	0.9864	0.9852
717	98.276	0.98276		717	0.9839	0.9832	0.9825	0.9821	0.9821
712	98.31	0.9831		712	0.9823	0.9827	0.9831	0.9835	0.9839
707	98.54	0.9854		707	0.9844	0.9849	0.9854	0.9859	0.9864
702	98.834	0.98834		702	0.987	0.9877	0.9883	0.989	0.9897
697	99.252	0.99252		697	0.9906	0.9914	0.9924	0.9935	0.9947
692	99.866	0.99866		692	0.9959	0.9973	0.9988	1.0002	1.0011
687	99.916	0.99916		687	1.0005	0.9999	0.9993	0.9986	0.9975
682	99.558	0.99558		682	0.9965	0.9958	0.9952	0.9952	0.9952
677	99.762	0.99762		677	0.9956	0.9965	0.9975	0.9987	0.9998
672	100.288	1.00288		672	1.0008	1.0018	1.0028	1.004	1.005
667	100.708	1.00708		667	1.0037	1.0067	1.0075	1.0083	1.0092
662	101.098	1.01098		662	1.0099	1.0104	1.011	1.0115	1.0121
657	101.248	1.01248		657	1.0124	1.0125	1.0125	1.0125	1.0125
652	101.074	1.01074		652	1.0124	1.0121	1.0114	1.0105	1.0073
647	98.378	0.98378		647	1.0032	0.997	0.985	0.9728	0.9609
642	92.672	0.92672		642	0.9488	0.9367	0.9247	0.9125	0.9109
637	93.296	0.93296		637	0.9128	0.9246	0.9335	0.9425	0.9514
632	97.602	0.97602		632	0.9604	0.9693	0.9783	0.9844	0.9877
627	99.652	0.99652		627	0.991	0.9942	0.9967	0.9992	1.0015
622	100.524	1.00524		622	1.0031	1.0046	1.0055	1.0062	1.0068
617	100.846	1.00846		617	1.0075	1.0083	1.0089	1.0088	1.0088
612	100.86	1.0086		612	1.0087	1.0087	1.0087	1.0086	1.0083
607	100.7	1.007		607	1.0078	1.0074	1.007	1.0066	1.0062
602	100.426	1.00426		602	1.0057	1.005	1.0043	1.0035	1.0028
597	99.942	0.99942		597	1.002	1.0012	0.9955	0.9996	0.9988
592	99.64	0.9964		592	0.998	0.9971	0.9965	0.9957	0.9947
587	99.158	0.99158		587	0.9937	0.9925	0.9916	0.9906	0.9895
582	98.686	0.98686		582	0.9885	0.9877	0.9868	0.9861	0.9852
577	98.232	0.98232		577	0.9843	0.9834	0.9825	0.9813	0.9801
572	97.548	0.97548		572	0.9788	0.9775	0.9757	0.9737	0.9717
567	96.33	0.9633		567	0.9691	0.9664	0.9638	0.9604	0.9568
562	94.058	0.94058		562	0.9531	0.947	0.9408	0.9343	0.9277
557	85.488	0.85488		557	0.9094	0.8762	0.8471	0.8296	0.8121
552	75.96	0.7596		552	0.7946	0.7771	0.7596	0.7421	0.7246
547	67.21	0.6721		547	0.7071	0.6896	0.6721	0.6546	0.6371
542	60.18	0.6018		542	0.6196	0.6021	0.5874	0.5859	0.614
537	75.684	0.75684		537	0.6615	0.7093	0.7568	0.8045	0.8521
532	88.582	0.88582		532	0.8936	0.8932	0.893	0.8808	0.8685
527	83.188	0.83188		527	0.8563	0.8441	0.8318	0.8197	0.8075
522	77.548	0.77548		522	0.7951	0.783	0.7708	0.764	0.7645
517	87.368	0.87368		517	0.8072	0.8791	0.8913	0.8938	0.897
512	92.294	0.92294		512	0.9006	0.9078	0.9217	0.9354	0.9492
507	95.564	0.95564		507	0.9553	0.9553	0.9553	0.9558	0.9565
502	87.05	0.8705		502	0.9236	0.8812	0.8497	0.8492	0.8488
497	84.91	0.8491		497	0.8483	0.8486	0.8491	0.8495	0.85
492	85.546	0.85546		492	0.8514	0.8535	0.8556	0.8575	0.8593
487	86.492	0.86492		487	0.8612	0.863	0.8649	0.8668	0.8687
482	87.2975	0.872975		482	0.8707	0.8724	0.8737	0.8751
