# Supplementary material for: Laboratory evaluation of a bio-insecticide candidate from tangerine peel extracts against Trialeurodes vaporariorum (Homoptera: Aleyrodidae)
Source: PeerJ journal article supplement (doi:10.7717/peerj.16885), 2024-03-19

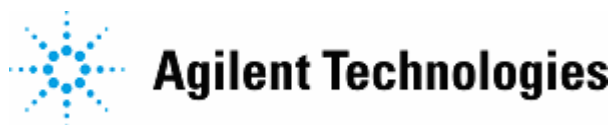

Sample ID:Pais 14-04-22 liquid

Sample Scans:8

Background Scans:8

Resolution:4

System Status:Good

File Location:C:\Users\Public\Documents\Agilent\MicroLab\Results\\Pais 14-04-22 liquid\_4-14-2022T9-28-39 AM.a2r

Method

Name:C:\Users\Public\Documents\Agilent\MicroLab\Methods\HR-400-4000 TRA.a2m

User:QUIMICA

Date/Time:04/14/2022 9:28:39 AM

Range:4000 - 400

Apodization:Happ-Genzel

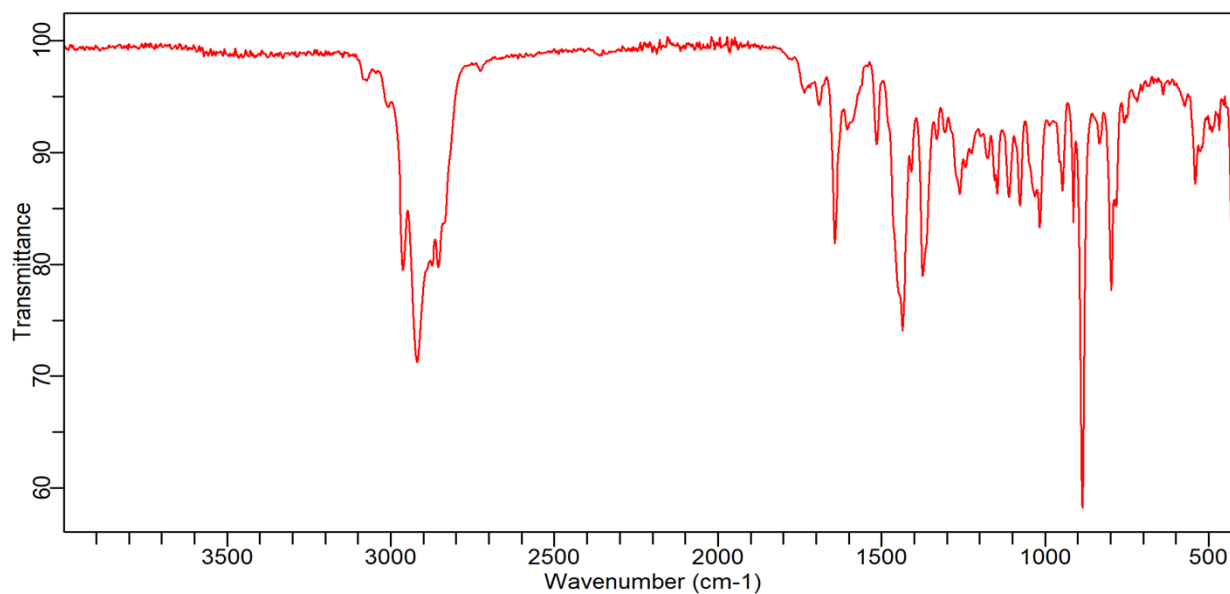

Supplement: FTIRSpectra.zip [file HEX_4-14-2022T9-28-39 AM.pdf › FTIRSpectra/HEX_4-14-2022T9-28-39 AM.pdf]
