# Supplementary material for: Laboratory evaluation of a bio-insecticide candidate from tangerine peel extracts against Trialeurodes vaporariorum (Homoptera: Aleyrodidae)
Source: PeerJ journal article supplement (doi:10.7717/peerj.16885), 2024-03-19

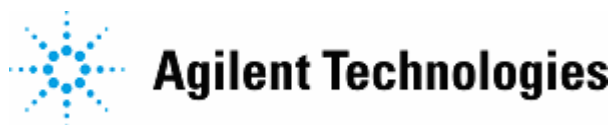

Sample ID: Limoneno-pais

Sample Scans: 8

Background Scans: 8

Resolution: 4

System Status: Good

File Location: C:\Users\Public\Documents\Agilent\MicroLab\Results\\Limoneno-pais\_2-17-2022T2-42-00 PM.a2r

Method

Name: C:\Users\Public\Documents\Agilent\MicroLab\Methods\HR-400-4000 TRA.a2m

User: QUIMICA

Date/Time: 02/17/2022 2:42:00 PM

Range: 4000 - 400

Apodization: Happ-Genzel

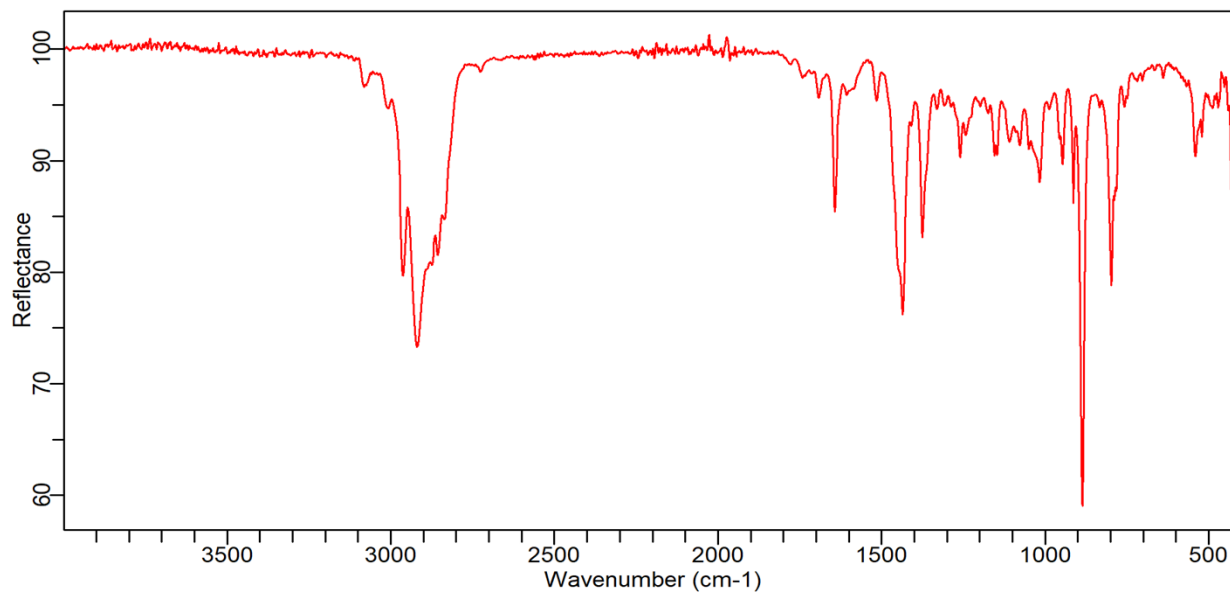

Supplement: FTIRSpectra.zip [file PET_2-17-2022T2-42-00 PM.pdf › FTIRSpectra/PET_2-17-2022T2-42-00 PM.pdf]
